# Supplementary material for: A Comprehensive Network Pharmacology-Based Strategy to Investigate Multiple Mechanisms of HeChan Tablet on Lung Cancer
Source: Evid Based Complement Alternat Med. 2020 May 30;2020:7658342. doi: 10.1155/2020/7658342 (PMC7277035; doi:10.1155/2020/7658342)
Supplement: Supplementary Materials — Supplementary file 1: compounds and putative target genes of HCT. Supplementary file 2: 507 common target genes among HCT and related genes of lung cancer. Supplementary file 3: 34 common target genes among HCT and known therapeutic genes of lung cancer. Supplementary file 4: hub gene information of common HCT-related genes of lung cancer PPI network. Supplementary file 5: hub gene information of HCT-known therapeutic genes of lung cancer PPI network, Supplementary file 6: information of hub genes filtered by PPI networks. [file 7658342.f1.zip]

Archive with 6 entries (6 files):
- 7658342.f1/Supplementary file 1 _ECAM_3084837.xlsx
- 7658342.f1/Supplementary file 2_ECAM_3084838.xlsx
- 7658342.f1/Supplementary file 3_ECAM_3084839.xlsx
- 7658342.f1/Supplementary file 4_ECAM_3084840.xlsx
- 7658342.f1/Supplementary file 5_ECAM_3084841.xlsx
- 7658342.f1/Supplementary file 6_ECAM_3084842.xlsx
