# Supplementary material for: A Comprehensive Network Pharmacology-Based Strategy to Investigate Multiple Mechanisms of HeChan Tablet on Lung Cancer
Source: Evid Based Complement Alternat Med. 2020 May 30;2020:7658342. doi: 10.1155/2020/7658342 (PMC7277035; doi:10.1155/2020/7658342)
Supplement: Supplementary Materials — Supplementary file 1: compounds and putative target genes of HCT. Supplementary file 2: 507 common target genes among HCT and related genes of lung cancer. Supplementary file 3: 34 common target genes among HCT and known therapeutic genes of lung cancer. Supplementary file 4: hub gene information of common HCT-related genes of lung cancer PPI network. Supplementary file 5: hub gene information of HCT-known therapeutic genes of lung cancer PPI network, Supplementary file 6: information of hub genes filtered by PPI networks. [file 7658342.f1.zip › 7658342.f1/Supplementary file 1 _ECAM_3084837.xlsx]

## Sheet: Table S1
Compounds	Targets Genes	Herbs
24-Ethylcholest-4-en-3-one	PGR	BX
24-Ethylcholest-4-en-3-one	NR3C2	BX
Cavidine	PTGS1	BX
Cavidine	CHRM3	BX
Cavidine	KCNH2	BX
Cavidine	CHRM1	BX
Cavidine	ADRB1	BX
Cavidine	SCN5A	BX
Cavidine	CHRM5	BX
Cavidine	PTGS2	BX
Cavidine	HTR3A	BX
Cavidine	ADRA2C	BX
Cavidine	CHRM4	BX
Cavidine	RXRA	BX
Cavidine	OPRD1	BX
Cavidine	ADRA1B	BX
Cavidine	ADRB2	BX
Cavidine	ADRA1D	BX
Cavidine	OPRM1	BX
Cavidine	RXRB	BX
Cavidine	CALM1	BX
Cavidine	SLC6A4	BX
Cavidine	F7	BX
Cavidine	PDE10A	BX
baicalein	PTGS1	BX
baicalein	AR	BX
baicalein	PTGS2	BX
baicalein	PDE3A	BX
baicalein	PRSS1	BX
baicalein	NCOA2	BX
baicalein	NCOA1	BX
baicalein	CALM1	BX
baicalein	RELA	BX
baicalein	AKT1	BX
baicalein	VEGFA	BX
baicalein	BCL2	BX
baicalein	FOS	BX
baicalein	MMP9	BX
baicalein	CASP3	BX
baicalein	TP53	BX
baicalein	HIF1A	BX
baicalein	MPO	BX
baicalein	AHR	BX
baicalein	CYCS	BX
baicalein	NFATC1	BX
baicalein	EGLN1	BX
baicalein	NOX5	BX
baicalein	APOD	BX
beta-sitosterol	PGR	BX
beta-sitosterol	NCOA2	BX
beta-sitosterol	PTGS1	BX
beta-sitosterol	PTGS2	BX
beta-sitosterol	KCNH2	BX
beta-sitosterol	CHRM3	BX
beta-sitosterol	CHRM1	BX
beta-sitosterol	SCN5A	BX
beta-sitosterol	CHRM4	BX
beta-sitosterol	PDE3A	BX
beta-sitosterol	ADRA1A	BX
beta-sitosterol	CHRM2	BX
beta-sitosterol	ADRA1B	BX
beta-sitosterol	ADRB2	BX
beta-sitosterol	CHRNA2	BX
beta-sitosterol	SLC6A4	BX
beta-sitosterol	OPRM1	BX
beta-sitosterol	GABRA1	BX
beta-sitosterol	BCL2	BX
beta-sitosterol	JUN	BX
beta-sitosterol	CASP3	BX
beta-sitosterol	CASP8	BX
beta-sitosterol	PRKCA	BX
beta-sitosterol	TGFB1	BX
beta-sitosterol	MAP2	BX
Stigmasterol	PGR	BX
Stigmasterol	NR3C2	BX
Stigmasterol	NCOA2	BX
Stigmasterol	ADH1C	BX
Stigmasterol	RXRA	BX
Stigmasterol	NCOA1	BX
Stigmasterol	PTGS1	BX
Stigmasterol	PTGS2	BX
Stigmasterol	ADRA2A	BX
Stigmasterol	SLC6A2	BX
Stigmasterol	SLC6A3	BX
Stigmasterol	ADRB2	BX
Stigmasterol	AKR1B1	BX
Stigmasterol	PLAU	BX
Stigmasterol	LTA4H	BX
Stigmasterol	MAOB	BX
Stigmasterol	MAOA	BX
Stigmasterol	CTRB1	BX
Stigmasterol	CHRM3	BX
Stigmasterol	CHRM1	BX
Stigmasterol	ADRB1	BX
Stigmasterol	SCN5A	BX
Stigmasterol	ADRA1A	BX
Stigmasterol	CHRM2	BX
Stigmasterol	ADRA1B	BX
Stigmasterol	GABRA1	BX
gondoic acid	PTGS1	BX
gondoic acid	NCOA2	BX
coniferin	CHRM3	BX
coniferin	CHRM1	BX
coniferin	ESR1	BX
coniferin	AR	BX
coniferin	SCN5A	BX
coniferin	PPARG	BX
coniferin	PTGS2	BX
coniferin	PDE3A	BX
coniferin	ADRA1B	BX
coniferin	ADRB2	BX
coniferin	ADRA1D	BX
coniferin	OPRM1	BX
coniferin	CCNA2	BX
coniferin	NCOA2	BX
coniferin	NCOA1	BX
10,13-eicosadienoic	PTGS1	BX
10,13-eicosadienoic	NCOA2	BX
(3S,6S)-3-(benzyl)-6-(4-hydroxybenzyl)piperazine-2,5-quinone	AR	BX
(3S,6S)-3-(benzyl)-6-(4-hydroxybenzyl)piperazine-2,5-quinone	PTGS2	BX
(3S,6S)-3-(benzyl)-6-(4-hydroxybenzyl)piperazine-2,5-quinone	ADRB2	BX
(3S,6S)-3-(benzyl)-6-(4-hydroxybenzyl)piperazine-2,5-quinone	CALM1	BX
Cycloartenol	NR3C2	BX
beta-D-Ribofuranoside, xanthine-9	PNP	BX
beta-D-Ribofuranoside, xanthine-9	PTGS2	BX
Cavidine	F10	BX
Cavidine	HTR2A	BX
Cavidine	HTR2C	BX
Cavidine	TOP2A	BX
Cavidine	HSP90AB1	BX
Cavidine	DRD1	BX
baicalein	HSP90AB1	BX
baicalein	DPP4?	BX
baicalein	PIK3CG	BX
baicalein	BAX	BX
baicalein	FOSL1	BX
baicalein	FOSL2	BX
baicalein	CDC2	BX
baicalein	CCNB1	BX
baicalein	IGF2	BX
baicalein	ALOX12	BX
baicalein	TDRD7	BX
baicalein	FABP5	BX
Baicalin	F10	BX
beta-sitosterol	HSP90AB1	BX
beta-sitosterol	PIK3CG	BX
beta-sitosterol	DRD1	BX
beta-sitosterol	HTR2A	BX
beta-sitosterol	GABRA5	BX
beta-sitosterol	CHRNA7	BX
beta-sitosterol	bax	BX
beta-sitosterol	CASP9	BX
beta-sitosterol	PON1	BX
Stigmasterol	IGHG1	BX
Stigmasterol	HTR2A	BX
Stigmasterol	CHRNA7	BX
coniferin	TOP2	BX
coniferin	CDK2	BX
coniferin	LACTB2	BX
coniferin	CHRNA7	BX
coniferin	IGHG1	BX
coniferin	PIM1	BX
(S)-Serine	CBS	BX
(S)-Serine	SPTLC1	BX
(S)-Serine	CBSL	BX
(S)-Serine	SPTLC2	BX
(S)-Serine	AGXT	BX
(S)-Serine	SARS	BX
(S)-Serine	SDS	BX
(S)-Serine	SRR	BX
(S)-Serine	SDSL	BX
(S)-Serine	SPTLC3	BX
(S)-Serine	GPT2	BX
(S)-Serine	ABAT	BX
(S)-Serine	SLC7A8	BX
(S)-Serine	NFS1	BX
(S)-Serine	SLC1A4	BX
(S)-Serine	AARS2	BX
(S)-Serine	PHYKPL	BX
(S)-Serine	GPT	BX
(S)-Serine	AARS	BX
(S)-Serine	SLC36A1	BX
(S)-Serine	AGXT2	BX
(S)-Serine	KYNU	BX
(S)-Serine	AZIN2	BX
(S)-Serine	ASL	BX
(S)-Serine	TARS	BX
(S)-Serine	THNSL1	BX
(S)-Serine	NOS2	BX
(S)-Serine	SLC7A3	BX
(S)-Serine	TARS2	BX
(S)-Serine	ASS1	BX
(S)-Serine	SLC7A1	BX
(S)-Serine	SLC7A4	BX
(S)-Serine	NOS3	BX
(S)-Serine	ARG2	BX
(S)-Serine	SLC26A6	BX
(S)-Serine	MTRR	BX
(S)-Serine	DAO	BX
(S)-Serine	ORMDL3	BX
(S)-Serine	SARS2	BX
(S)-Serine	CTH	BX
(S)-Serine	GSTP1	BX
(S)-Tyrosine	TPH2	BX
(S)-Tyrosine	TPH1	BX
(S)-Tyrosine	PAH	BX
(S)-Tyrosine	SLC7A8	BX
(S)-Tyrosine	ADRA2A	BX
(S)-Tyrosine	FARS2	BX
(S)-Tyrosine	DRD2	BX
(S)-Tyrosine	FARSA	BX
(S)-Tyrosine	DDC	BX
(S)-Tyrosine	DRD4	BX
(S)-Tyrosine	DRD3	BX
(S)-Tyrosine	FARSB	BX
(S)-Tyrosine	DRD5	BX
(S)-Tyrosine	DRD1	BX
(S)-Tyrosine	BCO2	BX
(S)-Tyrosine	PNMT	BX
(S)-Tyrosine	CXCL8	BX
(S)-Tyrosine	GPR143	BX
1-Octene	KCND1	BX
1-Octene	KCNA3	BX
1-Octene	PRKAB1	BX
1-Octene	ADH1A	BX
1-Octene	KCNA10	BX
1-Octene	GAMT	BX
1-Octene	KCNC3	BX
1-Octene	KCNA1	BX
1-Octene	KCNA2	BX
1-Octene	TPO	BX
1-Octene	CAT	BX
1-Octene	KCNB1	BX
1-Octene	ADH1B	BX
1-Octene	DLG4	BX
1-Octene	KCNC2	BX
1-Octene	KCNC1	BX
1-Octene	ADH1C	BX
1-Octene	KCNB2	BX
1-Octene	KCNA5	BX
1-Octene	RNASE1	BX
1-Octene	KCND2	BX
1-Octene	ALDH2	BX
1-Octene	KCNA4	BX
1-Octene	KCNA7	BX
1-Octene	KCNA6	BX
1-Octene	KCND3	BX
1-Octene	GUCY1B3	BX
1-Octene	GATM	BX
1-Octene	KCNK4	BX
1-Octene	IYD	BX
1-Octene	KCNQ1	BX
9-Heptadecanol	TRPV3	BX
9-Heptadecanol	OPRK1	BX
9-Heptadecanol	TRPM8	BX
9-Heptadecanol	TRPA1	BX
9-Heptadecanol	KCNK4	BX
Beta-Aminobutyric Acid	CACNA2D1	BX
Beta-Aminobutyric Acid	PLAT	BX
Beta-Aminobutyric Acid	CACNA1A	BX
Beta-Aminobutyric Acid	GRIN3B	BX
Beta-Aminobutyric Acid	CACNA2D2	BX
Beta-Aminobutyric Acid	GRIN2A	BX
Beta-Aminobutyric Acid	PLG	BX
Beta-Aminobutyric Acid	CACNA1B	BX
Beta-Aminobutyric Acid	GRIN2C	BX
Beta-Aminobutyric Acid	GRIN2B	BX
Beta-Aminobutyric Acid	GRIN3A	BX
Beta-Aminobutyric Acid	GRIN2D	BX
Beta-Aminobutyric Acid	ADORA1	BX
Beta-Aminobutyric Acid	GRIN1	BX
Beta-Aminobutyric Acid	DLL1	BX
Beta-Aminobutyric Acid	RIPK1	BX
Beta-Aminobutyric Acid	ASCL1	BX
Beta-Aminobutyric Acid	EPHX2	BX
Beta-Aminobutyric Acid	ADA	BX
Beta-Aminobutyric Acid	HAP1	BX
Choline	PLD1	BX
Choline	PCYT1A	BX
Choline	PCYT1B	BX
Choline	PHOSPHO1	BX
Choline	ACHE	BX
Choline	PLD2	BX
Choline	BCHE	BX
Choline	COLQ	BX
Coniine	CPT2	BX
Coniine	CPT1A	BX
Coniine	GABRB3	BX
Dauricine	ACHE	BX
Dauricine	CHRNA2	BX
Dauricine	HTR3A	BX
Dauricine	CHRM2	BX
Ephedrine	SLC6A3	BX
Ephedrine	ATF4	BX
Ephedrine	ADRA1A	BX
Ephedrine	ADRB2	BX
Ephedrine	JDP2	BX
Ephedrine	IL2	BX
Ephedrine	ADRA2A	BX
Ephedrine	ATF3	BX
Ephedrine	TNF	BX
Ephedrine	ATF2	BX
Ephedrine	ATF1	BX
Ephedrine	ADRB1	BX
Ephedrine	NFATC1	BX
Ephedrine	ATF5	BX
Ephedrine	JUN	BX
Ephedrine	SLC6A4	BX
Ephedrine	ACHE	BX
Ephedrine	SLC18A2	BX
Ephedrine	ATF7	BX
Ephedrine	ATF6	BX
Ephedrine	FOS	BX
Ephedrine	SLC6A2	BX
Ephedrine	DRD1	BX
Ephedrine	APLP1	BX
Ephedrine	SLC17A7	BX
Ephedrine	DDIT3	BX
Ephedrine	ARRB2	BX
Ephedrine	RAB7A	BX
Ephedrine	SLC18A1	BX
Ephedrine	CEND1	BX
Ephedrine	IL2RA	BX
Ephedrine	PARK7	BX
Ephedrine	COLQ	BX
Ephedrine	CALCOCO2	BX
Ephedrine	CREB1	BX
Ephedrine	WNT11	BX
Ephedrine	DAB2	BX
Ephedrine	SLC22A1	BX
Ephedrine	ADRA2C	BX
Ephedrine	BCHE	BX
Ephedrine	LTA	BX
Ephedrine	HERPUD1	BX
Ephedrine	RXRA	BX
Gamma-Aminobutyric Acid	CACNA2D1	BX
Gamma-Aminobutyric Acid	PLAT	BX
Gamma-Aminobutyric Acid	CACNA1A	BX
Gamma-Aminobutyric Acid	GRIN3B	BX
Gamma-Aminobutyric Acid	CACNA2D2	BX
Gamma-Aminobutyric Acid	GRIN2A	BX
Gamma-Aminobutyric Acid	PLG	BX
Gamma-Aminobutyric Acid	CACNA1B	BX
Gamma-Aminobutyric Acid	GRIN2C	BX
Gamma-Aminobutyric Acid	GRIN2B	BX
Gamma-Aminobutyric Acid	GRIN3A	BX
Gamma-Aminobutyric Acid	GRIN2D	BX
Gamma-Aminobutyric Acid	ADORA1	BX
Gamma-Aminobutyric Acid	GRIN1	BX
Gamma-Aminobutyric Acid	DLL1	BX
Gamma-Aminobutyric Acid	RIPK1	BX
Gamma-Aminobutyric Acid	ASCL1	BX
Gamma-Aminobutyric Acid	EPHX2	BX
Gamma-Aminobutyric Acid	ADA	BX
Gamma-Aminobutyric Acid	HAP1	BX
Gamma-Sitosterol	ESR1	BX
Gamma-Sitosterol	PGR	BX
Gamma-Sitosterol	VDR	BX
Gamma-Sitosterol	CYP27B1	BX
Gamma-Sitosterol	GC	BX
Gamma-Sitosterol	SNW1	BX
Guanosine	POLA1	BX
Guanosine	ADORA2A	BX
Guanosine	POLB	BX
Guanosine	DNMT1	BX
Homoharringtonine	RPL3	BX
L-Alanine	GPT2	BX
L-Alanine	ABAT	BX
L-Alanine	SLC7A8	BX
L-Alanine	NFS1	BX
L-Alanine	SLC1A4	BX
L-Alanine	AARS2	BX
L-Alanine	PHYKPL	BX
L-Alanine	GPT	BX
L-Alanine	AARS	BX
L-Alanine	AGXT	BX
L-Alanine	SLC36A1	BX
L-Alanine	AGXT2	BX
L-Alanine	KYNU	BX
L-Alanine	CBS	BX
L-Alanine	SPTLC1	BX
L-Alanine	CBSL	BX
L-Alanine	SPTLC2	BX
L-Alanine	SARS	BX
L-Alanine	SDS	BX
L-Alanine	SRR	BX
L-Alanine	SLC1A5	BX
L-Alanine	GOT2	BX
L-Alanine	BAAT	BX
L-Alanine	OAZ3	BX
L-Alanine	SHMT1	BX
L-Alanine	SLC1A1	BX
L-Alanine	SLC7A2	BX
L-Alanine	GCSH	BX
L-Alanine	PPAT	BX
L-Alanine	ACY3	BX
L-Alanine	ASPA	BX
L-Alanine	IARS2	BX
L-Alanine	GLRA2	BX
L-Alanine	ALAS1	BX
L-Alanine	BCAT1	BX
L-Alanine	GCAT	BX
L-Alanine	SLC38A3	BX
L-Alanine	VARS	BX
L-Alanine	SLC25A15	BX
L-Alanine	ADSSL1	BX
L-Alanine	VDAC3	BX
L-Alanine	GSS	BX
L-Alanine	ASNS	BX
L-Alanine	GLRA3	BX
L-Alanine	DARS2	BX
L-Alanine	GRIN3B	BX
L-Alanine	LCMT1	BX
L-Alanine	GRIN2A	BX
L-Alanine	GOT1	BX
L-Alanine	GNMT	BX
L-Alanine	GLRB	BX
L-Alanine	GLYAT	BX
L-Alanine	ASPH	BX
L-Alanine	GPR18	BX
L-Alanine	CTPS1	BX
L-Alanine	SLC25A12	BX
L-Alanine	GLYATL1	BX
L-Alanine	GATM	BX
L-Alanine	LARS	BX
L-Alanine	ARG1	BX
L-Alanine	NARS2	BX
L-Alanine	TNNC1	BX
L-Alanine	DARS	BX
L-Alanine	GRIN2C	BX
L-Alanine	OAT	BX
L-Alanine	GLDC	BX
L-Alanine	VDAC2	BX
L-Alanine	OAZ2	BX
L-Alanine	PIPOX	BX
L-Alanine	SLC25A2	BX
L-Alanine	GARS	BX
L-Alanine	SHMT2	BX
L-Alanine	ALAS2	BX
L-Alanine	VDAC1	BX
L-Alanine	SLC6A9	BX
L-Alanine	SLC7A3	BX
L-Alanine	ASRGL1	BX
L-Alanine	GLYATL2	BX
L-Alanine	SLC32A1	BX
L-Alanine	OAZ1	BX
L-Alanine	KARS	BX
L-Alanine	LARS2	BX
L-Alanine	RNASE1	BX
L-Alanine	ASS1	BX
L-Alanine	ADSS	BX
L-Alanine	SLC7A1	BX
L-Alanine	ACADSB	BX
L-Alanine	SLC6A5	BX
L-Alanine	SLC7A4	BX
L-Alanine	CAD	BX
L-Alanine	PCCB	BX
L-Alanine	OTC	BX
L-Alanine	GLUL	BX
L-Alanine	ARG2	BX
L-Alanine	IARS	BX
L-Alanine	BCAT2	BX
L-Alanine	ACY1	BX
L-Alanine	SLC25A13	BX
L-Alanine	GLRA1	BX
L-Alanine	LYZ	BX
L-Alanine	LCMT2	BX
L-Alanine	PAICS	BX
L-Alanine	NARS	BX
L-Alanine	PCK1	BX
L-Alanine	CCBL1	BX
L-Alanine	PCCA	BX
L-Alanine	ASPG	BX
L-Alanine	AZIN2	BX
L-Alanine	GAMT	BX
L-Alanine	ASL	BX
L-Alanine	TLR4	BX
L-Alanine	ASNSD1	BX
L-Alanine	SLC26A6	BX
L-Alanine	ISCU	BX
L-Alanine	SLC1A2	BX
L-Alanine	TFAP2B	BX
L-Alanine	HCN3	BX
L-Alanine	ALDH5A1	BX
L-Alanine	BACE1	BX
L-Alanine	ICMT	BX
L-Alanine	AMT	BX
L-Alanine	TYW5	BX
L-Alanine	HLCS	BX
L-Alanine	SLC1A3	BX
L-Alanine	TDO2	BX
L-Alanine	SLC38A7	BX
L-Alanine	CTPS2	BX
L-Alanine	HIF1AN	BX
L-Alanine	CPS1	BX
L-Alanine	LGSN	BX
L-Alanine	ACOT8	BX
L-Alanine	VARS2	BX
L-Alanine	TNNT2	BX
L-Alanine	PISD	BX
L-Alanine	FXN	BX
L-Alanine	TYMS	BX
L-Arginine	CAMLG	BX
L-Arginine	PPP3R2	BX
L-Arginine	PPIA	BX
L-Arginine	PPIF	BX
L-Arginine	TWIST1	BX
L-Histidine	SLC38A3	BX
L-Histidine	HDC	BX
L-Histidine	HAL	BX
L-Histidine	HARS	BX
L-Histidine	WARS2	BX
L-Histidine	WARS	BX
L-Histidine	PCK1	BX
L-Histidine	PRG3	BX
L-Histidine	SLC38A7	BX
L-Histidine	HARS2	BX
Methionine	BHMT2	BX
Methionine	MTRR	BX
Methionine	METAP2	BX
Methionine	MTR	BX
Methionine	BHMT	BX
Methionine	GSTP1	BX
Methionine	TRAF2	BX
Methionine	CBS	BX
Methionine	COMT	BX
Methyl Eicosanoate	NPR1	BX
Phenylalanine	SLC7A8	BX
Phenylalanine	TH	BX
Phenylalanine	TAT	BX
Phenylalanine	FARS2	BX
Phenylalanine	PAH	BX
Phenylalanine	FARSA	BX
Phenylalanine	FARSB	BX
Phenylalanine	YARS	BX
Phenylalanine	YARS2	BX
Phenylalanine	BCO2	BX
Phenylalanine	PNMT	BX
Phenylalanine	DDC	BX
Proline	P3H3	BX
Proline	PPIG	BX
Proline	PPIC	BX
Proline	PYCR1	BX
Proline	PRODH	BX
Proline	PARS2	BX
Proline	PPIA	BX
Proline	SLC6A14	BX
Proline	PPIF	BX
Proline	EPRS	BX
Proline	P4HA1	BX
Proline	PPIH	BX
Proline	PYCR2	BX
Proline	L3HYPDH	BX
Proline	PROSC	BX
Proline	PYCRL	BX
Proline	P3H2	BX
Proline	SLC6A7	BX
Proline	P4HA2	BX
Proline	P3H1	BX
Proline	PPIB	BX
Proline	TWIST1	BX
Proline	CRTAP	BX
Proline	EARS2	BX
Proline	PRODH2	BX
Proline	P4HB	BX
Trigonelline	PLAT	BX
Trigonelline	HCAR2	BX
Trigonelline	THBD	BX
Trigonelline	PPARG	BX
Trigonelline	QPRT	BX
Trigonelline	BCL2	BX
Trigonelline	FABP2	BX
Trigonelline	CFTR	BX
Trigonelline	HCAR3	BX
Trigonelline	PTGS1	BX
Trigonelline	PTGS2	BX
Trigonelline	NNMT	BX
Trigonelline	APOA2	BX
Trigonelline	TCAF1	BX
Trigonelline	IL1B	BX
Trigonelline	IL13	BX
Trigonelline	C1QTNF3	BX
Trigonelline	KCNE2	BX
Trigonelline	ANXA1	BX
Trigonelline	SERPINB7	BX
Valine	BCAT1	BX
Valine	VARS	BX
Valine	PCCB	BX
Valine	IARS2	BX
Valine	TARS	BX
Valine	LCMT1	BX
Valine	THNSL1	BX
Valine	LARS	BX
Valine	TARS2	BX
Valine	LARS2	BX
Valine	ACADSB	BX
Valine	IARS	BX
Valine	BCAT2	BX
Valine	LCMT2	BX
Valine	SLC1A5	BX
Valine	GOT2	BX
Valine	GPT2	BX
Valine	BAAT	BX
Valine	OAZ3	BX
Valine	SHMT1	BX
Valine	ABAT	BX
Valine	SLC1A1	BX
Valine	SLC7A2	BX
Valine	GCSH	BX
Valine	SLC7A8	BX
Valine	PPAT	BX
Valine	ACY3	BX
Valine	ASPA	BX
Valine	GLRA2	BX
Valine	ALAS1	BX
Valine	GCAT	BX
Valine	SLC38A3	BX
Valine	NFS1	BX
Valine	SLC25A15	BX
Valine	SLC1A4	BX
Valine	ADSSL1	BX
Valine	VDAC3	BX
Valine	GSS	BX
Valine	ASNS	BX
Valine	GLRA3	BX
Valine	DARS2	BX
Valine	GRIN3B	BX
Valine	GRIN2A	BX
Valine	GOT1	BX
Valine	GNMT	BX
Valine	GLRB	BX
Valine	GLYAT	BX
Valine	AARS2	BX
Valine	ASPH	BX
Valine	GPR18	BX
Valine	CTPS1	BX
Valine	SLC25A12	BX
Valine	PHYKPL	BX
Valine	GLYATL1	BX
Valine	GATM	BX
Valine	ARG1	BX
Valine	NARS2	BX
Valine	TNNC1	BX
Valine	DARS	BX
Valine	GRIN2C	BX
Valine	OAT	BX
Valine	GLDC	BX
Valine	VDAC2	BX
Valine	OAZ2	BX
Valine	PIPOX	BX
Valine	SLC25A2	BX
Valine	GARS	BX
Valine	GPT	BX
Valine	AARS	BX
Valine	SHMT2	BX
Valine	ALAS2	BX
Valine	VDAC1	BX
Valine	SLC6A9	BX
Valine	SLC7A3	BX
Valine	ASRGL1	BX
Valine	GLYATL2	BX
Valine	SLC32A1	BX
Valine	OAZ1	BX
Valine	KARS	BX
Valine	AGXT	BX
Valine	RNASE1	BX
Valine	ASS1	BX
Valine	ADSS	BX
Valine	SLC7A1	BX
Valine	SLC36A1	BX
Valine	SLC6A5	BX
Valine	SLC7A4	BX
Valine	CAD	BX
Valine	OTC	BX
Valine	GLUL	BX
Valine	AGXT2	BX
Valine	ARG2	BX
Valine	ACY1	BX
Valine	KYNU	BX
Valine	SLC25A13	BX
Valine	GLRA1	BX
Valine	LYZ	BX
Valine	PAICS	BX
Valine	NARS	BX
Valine	PCK1	BX
Valine	CCBL1	BX
Valine	PCCA	BX
Valine	ASPG	BX
Valine	AZIN2	BX
Valine	GAMT	BX
Valine	ASL	BX
Valine	TLR4	BX
Valine	ASNSD1	BX
Valine	SLC26A6	BX
Valine	ISCU	BX
Valine	SLC1A2	BX
Valine	TFAP2B	BX
Valine	HCN3	BX
Valine	ALDH5A1	BX
Valine	BACE1	BX
Valine	ICMT	BX
Valine	AMT	BX
Valine	TYW5	BX
Valine	HLCS	BX
Valine	SLC1A3	BX
Valine	TDO2	BX
Valine	SLC38A7	BX
Valine	CTPS2	BX
Valine	HIF1AN	BX
Valine	CPS1	BX
Valine	LGSN	BX
Valine	ACOT8	BX
Valine	VARS2	BX
Valine	TNNT2	BX
Valine	PISD	BX
Valine	FXN	BX
Valine	TYMS	BX
7-Dehydrocholesterol	VDR	GCP
7-Dehydrocholesterol	CYP27B1	GCP
7-Dehydrocholesterol	GC	GCP
7-Dehydrocholesterol	SNW1	GCP
Adrenaline	ADRA1A	GCP
Adrenaline	ADRB2	GCP
Adrenaline	ADRA2A	GCP
Adrenaline	TNF	GCP
Adrenaline	ADRB1	GCP
Adrenaline	ADRA1D	GCP
Adrenaline	PAH	GCP
Adrenaline	ADRA1B	GCP
Adrenaline	ADRA2C	GCP
Adrenaline	ADRB3	GCP
Adrenaline	ADRA2B	GCP
Adrenaline	MAPK1	GCP
Adrenaline	PIK3R3	GCP
Adrenaline	PIK3R1	GCP
Adrenaline	SLC18A1	GCP
Adrenaline	SLC18A2	GCP
Adrenaline	PIK3R2	GCP
Adrenaline	PHKG2	GCP
Adrenaline	APLP1	GCP
Adrenaline	CHRNA7	GCP
Adrenaline	PIK3CA	GCP
Adrenaline	ARRB2	GCP
Adrenaline	RAB7A	GCP
Adrenaline	INS	GCP
Adrenaline	CALCOCO2	GCP
Adrenaline	ARRDC3	GCP
Adrenaline	LTA	GCP
Adrenaline	CALCA	GCP
Adrenaline	RXRA	GCP
Bufothionine	SCNN1A	GCP
Bufothionine	KCNJ8	GCP
Bufothionine	ADRA1A	GCP
Bufothionine	SCN1A	GCP
Bufothionine	SCNN1G	GCP
Bufothionine	HTR2A	GCP
Bufothionine	ADRB2	GCP
Bufothionine	ACACB	GCP
Bufothionine	MTAP	GCP
Bufothionine	ADRA2A	GCP
Bufothionine	TLR8	GCP
Bufothionine	ADRB1	GCP
Bufothionine	APRT	GCP
Bufothionine	ADRA1D	GCP
Bufothionine	PECR	GCP
Bufothionine	HRH1	GCP
Bufothionine	PRKAA1	GCP
Bufothionine	HTR7	GCP
Bufothionine	HRH2	GCP
Bufothionine	ADRA1B	GCP
Bufothionine	SCNN1D	GCP
Bufothionine	ADRA2C	GCP
Bufothionine	AOC3	GCP
Bufothionine	P4HA1	GCP
Bufothionine	SRPK2	GCP
Bufothionine	TLR7	GCP
Bufothionine	KCNJ1	GCP
Bufothionine	AGTR1	GCP
Bufothionine	ADRB3	GCP
Bufothionine	ACP1	GCP
Bufothionine	SCNN1B	GCP
Bufothionine	CYP2B6	GCP
Bufothionine	ADRA2B	GCP
Bufothionine	SLC6A2	GCP
Bufothionine	SAXO1	GCP
Bufothionine	SCT	GCP
Bufothionine	UGCG	GCP
Bufothionine	PHKG2	GCP
Bufothionine	APLP1	GCP
Bufothionine	ADK	GCP
Bufothionine	ACACA	GCP
Bufothionine	CHRNA7	GCP
Bufothionine	PNP	GCP
Bufothionine	ARRB2	GCP
Bufothionine	RAB7A	GCP
Bufothionine	PRKAA2	GCP
Bufothionine	HTR2C	GCP
Bufothionine	HSP90AB1	GCP
Bufothionine	ALDH3A2	GCP
Bufothionine	INS	GCP
Bufothionine	CALCOCO2	GCP
Bufothionine	SLC22A1	GCP
Bufothionine	AOC2	GCP
Bufothionine	ARRDC3	GCP
Bufothionine	CALCA	GCP
Bufothionine	HPRT1	GCP
Bufothionine	ACTN2	GCP
Campesterol	ESR1	GCP
Campesterol	PGR	GCP
Cholesterol	VDR	GCP
Cholesterol	CYP27B1	GCP
Cholesterol	GC	GCP
Cholesterol	SNW1	GCP
Dehydrobufotenine	PDE7B	GCP
Dehydrobufotenine	PDE5A	GCP
Dehydrobufotenine	PDE9A	GCP
Dehydrobufotenine	PDE4A	GCP
Dehydrobufotenine	RYR1	GCP
Dehydrobufotenine	CYP17A1	GCP
Dehydrobufotenine	PDE3A	GCP
Dehydrobufotenine	ADORA2A	GCP
Dehydrobufotenine	ITPR1	GCP
Dehydrobufotenine	PDE6A	GCP
Dehydrobufotenine	PRKDC	GCP
Dehydrobufotenine	PIK3CD	GCP
Dehydrobufotenine	ESR1	GCP
Dehydrobufotenine	PDE3B	GCP
Dehydrobufotenine	PGD	GCP
Dehydrobufotenine	PIK3CA	GCP
Dehydrobufotenine	ADORA2B	GCP
Dehydrobufotenine	PDE1A	GCP
Dehydrobufotenine	PDE4D	GCP
Dehydrobufotenine	PGR	GCP
Dehydrobufotenine	PIK3CB	GCP
Dehydrobufotenine	ITPR2	GCP
Dehydrobufotenine	PDE1B	GCP
Dehydrobufotenine	OPRK1	GCP
Dehydrobufotenine	PDE7A	GCP
Dehydrobufotenine	ITPR3	GCP
Dehydrobufotenine	POLA2	GCP
Dehydrobufotenine	PDE4C	GCP
Dehydrobufotenine	PDE10A	GCP
Dehydrobufotenine	PDE1C	GCP
Dehydrobufotenine	ATM	GCP
Dehydrobufotenine	PDE6B	GCP
Dehydrobufotenine	PDE4B	GCP
Dehydrobufotenine	PDE2A	GCP
Dehydrobufotenine	ADORA1	GCP
Dehydrobufotenine	CYP19A1	GCP
Dehydrobufotenine	PDE8B	GCP
Dehydrobufotenine	NT5E	GCP
Dehydrobufotenine	HDAC2	GCP
Dehydrobufotenine	PDE6C	GCP
Dehydrobufotenine	PDE11A	GCP
Dehydrobufotenine	PDE8A	GCP
Dehydrobufotenine	NR3C2	GCP
Dehydrobufotenine	RINT1	GCP
Dehydrobufotenine	RIPK1	GCP
Dehydrobufotenine	PIK3R1	GCP
Dehydrobufotenine	WNT4	GCP
Dehydrobufotenine	TACR2	GCP
Dehydrobufotenine	AMPD3	GCP
Dehydrobufotenine	CX3CR1	GCP
Dehydrobufotenine	ADA	GCP
Dehydrobufotenine	HAP1	GCP
Dehydrobufotenine	IDNK	GCP
Gamma-Aminobutyric Acid	CACNA2D1	GCP
Gamma-Aminobutyric Acid	PLAT	GCP
Gamma-Aminobutyric Acid	CACNA1A	GCP
Gamma-Aminobutyric Acid	GRIN3B	GCP
Gamma-Aminobutyric Acid	CACNA2D2	GCP
Gamma-Aminobutyric Acid	GRIN2A	GCP
Gamma-Aminobutyric Acid	PLG	GCP
Gamma-Aminobutyric Acid	CACNA1B	GCP
Gamma-Aminobutyric Acid	GRIN2C	GCP
Gamma-Aminobutyric Acid	GRIN2B	GCP
Gamma-Aminobutyric Acid	GRIN3A	GCP
Gamma-Aminobutyric Acid	GRIN2D	GCP
Gamma-Aminobutyric Acid	ADORA1	GCP
Gamma-Aminobutyric Acid	GRIN1	GCP
Gamma-Aminobutyric Acid	DLL1	GCP
Gamma-Aminobutyric Acid	RIPK1	GCP
Gamma-Aminobutyric Acid	ASCL1	GCP
Gamma-Aminobutyric Acid	EPHX2	GCP
Gamma-Aminobutyric Acid	ADA	GCP
Gamma-Aminobutyric Acid	HAP1	GCP
Gamma-Sitosterol	ESR1	GCP
Gamma-Sitosterol	PGR	GCP
Gamma-Sitosterol	VDR	GCP
Gamma-Sitosterol	CYP27B1	GCP
Gamma-Sitosterol	GC	GCP
Gamma-Sitosterol	SNW1	GCP
Morphine	OPRD1	GCP
Morphine	OPRK1	GCP
Morphine	OPRM1	GCP
Morphine	CHRNG	GCP
Morphine	KCNK1	GCP
Morphine	CHRNA4	GCP
Morphine	CHRNB3	GCP
Morphine	CHRNA7	GCP
Morphine	SCN5A	GCP
Morphine	CHRNA1	GCP
Morphine	CHRNA10	GCP
Morphine	CHRNA3	GCP
Morphine	CHRNB2	GCP
Morphine	ACHE	GCP
Morphine	KCNH2	GCP
Morphine	CHRNE	GCP
Morphine	CHRNA2	GCP
Morphine	CHRNA6	GCP
Morphine	GP9	GCP
Morphine	KCNN4	GCP
Morphine	KCNK6	GCP
Morphine	CHRND	GCP
Morphine	BCHE	GCP
Morphine	CHRNA9	GCP
Morphine	CHRFAM7A	GCP
Morphine	CHRNA5	GCP
Morphine	CHRNB4	GCP
Morphine	CHRNB1	GCP
Morphine	WLS	GCP
Serotonin	ADRA1A	GCP
Serotonin	ESRRG	GCP
Serotonin	ESR2	GCP
Serotonin	ADRA2A	GCP
Serotonin	ESR1	GCP
Serotonin	ADRA1D	GCP
Serotonin	ADRA1B	GCP
Serotonin	ADRA2C	GCP
Serotonin	ADRA2B	GCP
Serotonin	PHKG2	GCP
Serotonin	APLP1	GCP
Serotonin	CHRNA7	GCP
Serotonin	INS	GCP
Serotonin	CALCA	GCP
Tryptanthrin	HTR4	GCP
Tryptanthrin	GABRA2	GCP
Tryptanthrin	PROS1	GCP
Tryptanthrin	PROZ	GCP
Tryptanthrin	AVPR1A	GCP
Tryptanthrin	NQO2	GCP
Tryptanthrin	HTR1B	GCP
Tryptanthrin	GABRA3	GCP
Tryptanthrin	F7	GCP
Tryptanthrin	F9	GCP
Tryptanthrin	GGCX	GCP
Tryptanthrin	F10	GCP
Tryptanthrin	VKORC1	GCP
Tryptanthrin	JUN	GCP
Tryptanthrin	PROC	GCP
Tryptanthrin	OPRM1	GCP
Tryptanthrin	AGTR2	GCP
Tryptanthrin	BGLAP	GCP
Tryptanthrin	PTGS1	GCP
Tryptanthrin	AVPR2	GCP
Tryptanthrin	HTR1A	GCP
Tryptanthrin	PTGS2	GCP
Tryptanthrin	HTR3A	GCP
Tryptanthrin	GABRA1	GCP
Tryptanthrin	NQO1	GCP
Tryptanthrin	AGTR1	GCP
Tryptanthrin	VKORC1L1	GCP
Tryptanthrin	F2	GCP
Tryptanthrin	AGT	GCP
Tryptanthrin	CBR4	GCP
Tryptanthrin	AVP	GCP
Tryptanthrin	PAX2	GCP
Tryptanthrin	DAB2	GCP
Tryptanthrin	MGP	GCP
Tryptanthrin	F3	GCP
Tryptanthrin	WLS	GCP
Tryptanthrin	GPR27	GCP
Tryptanthrin	SERPINB7	GCP
Tryptanthrin	ACTN2	GCP
Truflex OBP	CHRM1	YXC
Truflex OBP	SCN5A	YXC
Truflex OBP	SLC6A2	YXC
Truflex OBP	ADRA1B	YXC
Truflex OBP	SLC6A3	YXC
Truflex OBP	ADRB2	YXC
Truflex OBP	PDE3A	YXC
vittadinoside_qt	PGR	YXC
vittadinoside_qt	NR3C2	YXC
Mandenol	PTGS1	YXC
Mandenol	PTGS2	YXC
Mandenol	NCOA2	YXC
Sitosteryl acetate	PGR	YXC
7-O-Methyleriodictyol	PTGS1	YXC
7-O-Methyleriodictyol	PTGS2	YXC
7-O-Methyleriodictyol	CALM1	YXC
beta-sitosterol	PGR	YXC
beta-sitosterol	NCOA2	YXC
beta-sitosterol	PTGS1	YXC
beta-sitosterol	PTGS2	YXC
beta-sitosterol	KCNH2	YXC
beta-sitosterol	CHRM3	YXC
beta-sitosterol	CHRM1	YXC
beta-sitosterol	SCN5A	YXC
beta-sitosterol	CHRM4	YXC
beta-sitosterol	PDE3A	YXC
beta-sitosterol	ADRA1A	YXC
beta-sitosterol	CHRM2	YXC
beta-sitosterol	ADRA1B	YXC
beta-sitosterol	ADRB2	YXC
beta-sitosterol	CHRNA2	YXC
beta-sitosterol	SLC6A4	YXC
beta-sitosterol	OPRM1	YXC
beta-sitosterol	GABRA1	YXC
beta-sitosterol	BCL2	YXC
beta-sitosterol	JUN	YXC
beta-sitosterol	CASP3	YXC
beta-sitosterol	CASP8	YXC
beta-sitosterol	PRKCA	YXC
beta-sitosterol	TGFB1	YXC
beta-sitosterol	MAP2	YXC
Stigmasterol	PGR	YXC
Stigmasterol	NR3C2	YXC
Stigmasterol	NCOA2	YXC
Stigmasterol	ADH1C	YXC
Stigmasterol	RXRA	YXC
Stigmasterol	NCOA1	YXC
Stigmasterol	PTGS1	YXC
Stigmasterol	PTGS2	YXC
Stigmasterol	ADRA2A	YXC
Stigmasterol	SLC6A2	YXC
Stigmasterol	SLC6A3	YXC
Stigmasterol	ADRB2	YXC
Stigmasterol	AKR1B1	YXC
Stigmasterol	PLAU	YXC
Stigmasterol	LTA4H	YXC
Stigmasterol	MAOB	YXC
Stigmasterol	MAOA	YXC
Stigmasterol	CTRB1	YXC
Stigmasterol	CHRM3	YXC
Stigmasterol	CHRM1	YXC
Stigmasterol	ADRB1	YXC
Stigmasterol	SCN5A	YXC
Stigmasterol	ADRA1A	YXC
Stigmasterol	CHRM2	YXC
Stigmasterol	ADRA1B	YXC
Stigmasterol	GABRA1	YXC
campesterol	PGR	YXC
poriferasterol monoglucoside_qt	PGR	YXC
poriferasterol monoglucoside_qt	NCOA2	YXC
CLR	PGR	YXC
CLR	NR3C2	YXC
CLR	NCOA2	YXC
7-O-Methyleriodictyol	HSP90AB1	YXC
beta-sitosterol	HSP90AB1	YXC
beta-sitosterol	PIK3CG	YXC
beta-sitosterol	DRD1	YXC
beta-sitosterol	GABRA2	YXC
beta-sitosterol	HTR2A	YXC
beta-sitosterol	GABRA5	YXC
beta-sitosterol	GABRA3	YXC
beta-sitosterol	NACHRA7	YXC
beta-sitosterol	BAX	YXC
beta-sitosterol	CASP9?	YXC
beta-sitosterol	PON1	YXC
Stigmasterol	IGHG1	YXC
Stigmasterol	HTR2A	YXC
Stigmasterol	Gabra3	YXC
Stigmasterol	NACHRA7	YXC
Anemonin	CHRM3	YXC
Anemonin	CHRM1	YXC
Anemonin	CHRM2	YXC
Diop	SCN5A	RS
Diop	ADRB2	RS
Diop	CHRM3	RS
Stigmasterol	PGR	RS
Stigmasterol	NR3C2	RS
Stigmasterol	NCOA2	RS
Stigmasterol	ADH1C	RS
Stigmasterol	RXRA	RS
Stigmasterol	NCOA1	RS
Stigmasterol	PTGS1	RS
Stigmasterol	PTGS2	RS
Stigmasterol	ADRA2A	RS
Stigmasterol	SLC6A2	RS
Stigmasterol	SLC6A3	RS
Stigmasterol	ADRB2	RS
Stigmasterol	AKR1B1	RS
Stigmasterol	PLAU	RS
Stigmasterol	LTA4H	RS
Stigmasterol	MAOB	RS
Stigmasterol	MAOA	RS
Stigmasterol	CTRB1	RS
Stigmasterol	CHRM3	RS
Stigmasterol	CHRM1	RS
Stigmasterol	ADRB1	RS
Stigmasterol	SCN5A	RS
Stigmasterol	ADRA1A	RS
Stigmasterol	CHRM2	RS
Stigmasterol	ADRA1B	RS
Stigmasterol	GABRA1	RS
beta-sitosterol	PGR	RS
beta-sitosterol	NCOA2	RS
beta-sitosterol	PTGS1	RS
beta-sitosterol	PTGS2	RS
beta-sitosterol	KCNH2	RS
beta-sitosterol	CHRM3	RS
beta-sitosterol	CHRM1	RS
beta-sitosterol	SCN5A	RS
beta-sitosterol	CHRM4	RS
beta-sitosterol	PDE3A	RS
beta-sitosterol	ADRA1A	RS
beta-sitosterol	CHRM2	RS
beta-sitosterol	ADRA1B	RS
beta-sitosterol	ADRB2	RS
beta-sitosterol	CHRNA2	RS
beta-sitosterol	SLC6A4	RS
beta-sitosterol	OPRM1	RS
beta-sitosterol	GABRA1	RS
beta-sitosterol	BCL2	RS
beta-sitosterol	JUN	RS
beta-sitosterol	CASP3	RS
beta-sitosterol	CASP8	RS
beta-sitosterol	PRKCA	RS
beta-sitosterol	TGFB1	RS
beta-sitosterol	MAP2	RS
Inermin	PTGS1	RS
Inermin	CHRM3	RS
Inermin	SCN5A	RS
Inermin	PTGS2	RS
Inermin	HTR3A	RS
Inermin	RXRA	RS
Inermin	ADRA1B	RS
Inermin	ADRB2	RS
Inermin	ADRA1D	RS
Inermin	SLC6A4	RS
Inermin	PRSS1	RS
Inermin	NCOA1	RS
Inermin	CALM1	RS
kaempferol	NOS2	RS
kaempferol	PTGS1	RS
kaempferol	AR	RS
kaempferol	PPARG	RS
kaempferol	PTGS2	RS
kaempferol	NCOA2	RS
kaempferol	PRSS1	RS
kaempferol	PGR	RS
kaempferol	CHRM1	RS
kaempferol	ACHE	RS
kaempferol	SLC6A2	RS
kaempferol	CHRM2	RS
kaempferol	ADRA1B	RS
kaempferol	GABRA1	RS
kaempferol	F7	RS
kaempferol	CALM1	RS
kaempferol	RELA	RS
kaempferol	IKBKB	RS
kaempferol	IKBKE	RS
kaempferol	AKT1	RS
kaempferol	BCL2	RS
kaempferol	TNF	RS
kaempferol	JUN	RS
kaempferol	CASP3	RS
kaempferol	MAPK8	RS
kaempferol	XDH	RS
kaempferol	MMP1	RS
kaempferol	HMOX1	RS
kaempferol	CYP3A4	RS
kaempferol	CYP1A2	RS
kaempferol	CYP1A1	RS
kaempferol	ICAM1	RS
kaempferol	SELE	RS
kaempferol	VCAM1	RS
kaempferol	NR1I2	RS
kaempferol	CYP1B1	RS
kaempferol	ALOX5	RS
kaempferol	HAS2	RS
kaempferol	GSTP1	RS
kaempferol	AHR	RS
kaempferol	NR1I3	RS
kaempferol	INSR	RS
kaempferol	INSRR	RS
kaempferol	GSTM1	RS
kaempferol	GSTM2	RS
kaempferol	AKR1C3	RS
Aposiopolamine	CHRM3	RS
Aposiopolamine	CHRM1	RS
Aposiopolamine	SLC6A2	RS
Aposiopolamine	SLC6A3	RS
Aposiopolamine	ADRB2	RS
Aposiopolamine	SLC6A4	RS
Aposiopolamine	GABRA1	RS
Deoxyharringtonine	AR	RS
Deoxyharringtonine	NR3C2	RS
Dianthramine	PTGS1	RS
Dianthramine	PTGS2	RS
arachidonate	PTGS1	RS
arachidonate	PTGS2	RS
arachidonate	RXRG	RS
arachidonate	NCOA2	RS
Frutinone A	PTGS1	RS
Frutinone A	AR	RS
Frutinone A	SCN5A	RS
Frutinone A	PPARG	RS
Frutinone A	PTGS2	RS
Frutinone A	RXRA	RS
Frutinone A	PDE3A	RS
Frutinone A	ADRB2	RS
Frutinone A	GABRA1	RS
Frutinone A	ACHE	RS
ginsenoside rh2	TNF	RS
ginsenoside rh2	CASP3	RS
ginsenoside rh2	PTGS2	RS
ginsenoside rh2	NFKBIA	RS
ginsenoside rh2	IL1B	RS
ginsenoside rh2	CASP1	RS
ginsenoside rh2	IFNG	RS
ginsenoside rh2	ADCYAP1	RS
ginsenoside rh2	PSMG1	RS
Ginsenoside-Rh4_qt	NR3C2	RS
Ginsenoside-Rh4_qt	NCOA2	RS
Girinimbin	PTGS1	RS
Girinimbin	SCN5A	RS
Girinimbin	PTGS2	RS
Girinimbin	RXRA	RS
Girinimbin	ADRB2	RS
Girinimbin	GABRA1	RS
Girinimbin	NCOA2	RS
Panaxadiol	NR3C1	RS
suchilactone	KCNH2	RS
suchilactone	SCN5A	RS
suchilactone	PTGS2	RS
suchilactone	F7	RS
suchilactone	ADRB2	RS
suchilactone	NCOA1	RS
suchilactone	CALM1	RS
suchilactone	PTGS1	RS
suchilactone	RXRA	RS
suchilactone	PDE3A	RS
suchilactone	ADRA1D	RS
alexandrin_qt	PGR	RS
Fumarine	PTGS1	RS
Fumarine	CHRM3	RS
Fumarine	KCNH2	RS
Fumarine	CHRM1	RS
Fumarine	SCN5A	RS
Fumarine	CHRM5	RS
Fumarine	PTGS2	RS
Fumarine	HTR3A	RS
Fumarine	F7	RS
Fumarine	CHRM4	RS
Fumarine	OPRD1	RS
Fumarine	ADRA1B	RS
Fumarine	ADRB2	RS
Fumarine	ADRA1D	RS
Fumarine	OPRM1	RS
Fumarine	CALM1	RS
Fumarine	SLC6A4	RS
Fumarine	CACNA1S	RS
Fumarine	PDE3A	RS
Fumarine	SLC6A3	RS
Fumarine	KDR	RS
Fumarine	SIK3	RS
Stigmasterol	PRKACA	RS
Stigmasterol	HTR2A	RS
Stigmasterol	GABRA3	RS
Stigmasterol	CHRNA7	RS
beta-sitosterol	HSP90AA1	RS
beta-sitosterol	PIK3CG	RS
beta-sitosterol	PRKACA	RS
beta-sitosterol	DRD1	RS
beta-sitosterol	GABRA2	RS
beta-sitosterol	HTR2A	RS
beta-sitosterol	GABRA5	RS
beta-sitosterol	GABRA3	RS
beta-sitosterol	CHRNA7	RS
beta-sitosterol	BAX	RS
beta-sitosterol	CASP9	RS
beta-sitosterol	PON1	RS
Inermin	HSP90AA1	RS
Inermin	PIK3CG	RS
Inermin	CHRNA7	RS
Inermin	PRKACA	RS
kaempferol	HSP90AA1	RS
kaempferol	PIK3CG	RS
kaempferol	PRKACA	RS
kaempferol	DPP4	RS
kaempferol	F2	RS
kaempferol	NOS3	RS
kaempferol	GABRA2	RS
kaempferol	TOP2A	RS
kaempferol	BAX	RS
kaempferol	AHSA1	RS
kaempferol	STAT1	RS
kaempferol	PPARG	RS
kaempferol	PSMD3	RS
kaempferol	SLC2A4	RS
kaempferol	DIO1	RS
kaempferol	PPP3CA	RS
Aposiopolamine	DPP4	RS
Dianthramine	HSP90AA1	RS
Frutinone A	F2	RS
Frutinone A	DPP4	RS
Frutinone A	HSP90AA1	RS
Frutinone A	PIK3CG	RS
Frutinone A	CHRNA7	RS
Frutinone A	PRKACA	RS
ginsenoside rh2	BAX	RS
ginsenoside rh2	MAP2K4	RS
ginsenoside rh2	SLC2A4	RS
Girinimbin	PIK3CG	RS
Girinimbin	CHRNA7	RS
Girinimbin	PRKACA	RS
suchilactone	F10	RS
suchilactone	HSP90AA1	RS
suchilactone	KCNMA1	RS
suchilactone	PRKACA	RS
Fumarine	F10	RS
Fumarine	HTR2A	RS
Fumarine	HSP90AA1	RS
Fumarine	PRKACA	RS
Fumarine	TOP2A	RS
Fumarine	DRD1	RS
1-Heptadecanol	TRPV3	RS
1-Heptadecanol	OPRK1	RS
1-Heptadecanol	TRPM8	RS
1-Heptadecanol	TRPA1	RS
1-Heptadecanol	CACNB1	RS
1-Heptadecanol	GRIA4	RS
1-Heptadecanol	GABRA2	RS
1-Heptadecanol	CACNG2	RS
1-Heptadecanol	GABRD	RS
1-Heptadecanol	CHRNA4	RS
1-Heptadecanol	CHRNB3	RS
1-Heptadecanol	GABRB1	RS
1-Heptadecanol	GRIA1	RS
1-Heptadecanol	GLRA2	RS
1-Heptadecanol	KCNJ3	RS
1-Heptadecanol	GABRG3	RS
1-Heptadecanol	VCAM1	RS
1-Heptadecanol	CHRNA7	RS
1-Heptadecanol	KCNJ6	RS
1-Heptadecanol	GABRE	RS
1-Heptadecanol	GABRA3	RS
1-Heptadecanol	SLC29A1	RS
1-Heptadecanol	CACNA1S	RS
1-Heptadecanol	GABRG1	RS
1-Heptadecanol	GABRP	RS
1-Heptadecanol	CHRNA10	RS
1-Heptadecanol	GRIA2	RS
1-Heptadecanol	GABRA4	RS
1-Heptadecanol	CHRNA3	RS
1-Heptadecanol	GABRB2	RS
1-Heptadecanol	CACNA1C	RS
1-Heptadecanol	CHRNB2	RS
1-Heptadecanol	CACNA1D	RS
1-Heptadecanol	HTR3D	RS
1-Heptadecanol	GABRQ	RS
1-Heptadecanol	CHRNA2	RS
1-Heptadecanol	CHRNA6	RS
1-Heptadecanol	GABRB3	RS
1-Heptadecanol	KCNJ5	RS
1-Heptadecanol	GRIN3A	RS
1-Heptadecanol	HTR3B	RS
1-Heptadecanol	GRIA3	RS
1-Heptadecanol	GABRA5	RS
1-Heptadecanol	SLC29A2	RS
1-Heptadecanol	HTR3E	RS
1-Heptadecanol	GABRA6	RS
1-Heptadecanol	HTR3A	RS
1-Heptadecanol	GABRA1	RS
1-Heptadecanol	CHRNA9	RS
1-Heptadecanol	CHRFAM7A	RS
1-Heptadecanol	CHRNA5	RS
1-Heptadecanol	CHRNB4	RS
1-Heptadecanol	KCNJ9	RS
1-Heptadecanol	HTR3C	RS
1-Heptadecanol	GLRA1	RS
1-Heptadecanol	CACNG1	RS
1-Heptadecanol	ADAM8	RS
1-Heptadecanol	SLC28A3	RS
1-Heptadecanol	ADRA1B	RS
1-Heptadecanol	FOXL2	RS
1-Heptadecanol	DMTN	RS
1-Heptadecanol	KCNMA1	RS
1-Tetradecanol	TRPV3	RS
1-Tetradecanol	OPRK1	RS
1-Tetradecanol	TRPM8	RS
1-Tetradecanol	TRPA1	RS
1-Tetradecanol	CACNB1	RS
1-Tetradecanol	GRIA4	RS
1-Tetradecanol	GABRA2	RS
1-Tetradecanol	CACNG2	RS
1-Tetradecanol	GABRD	RS
1-Tetradecanol	CHRNA4	RS
1-Tetradecanol	CHRNB3	RS
1-Tetradecanol	GABRB1	RS
1-Tetradecanol	GRIA1	RS
1-Tetradecanol	GLRA2	RS
1-Tetradecanol	KCNJ3	RS
1-Tetradecanol	GABRG3	RS
1-Tetradecanol	VCAM1	RS
1-Tetradecanol	CHRNA7	RS
1-Tetradecanol	KCNJ6	RS
1-Tetradecanol	GABRE	RS
1-Tetradecanol	GABRA3	RS
1-Tetradecanol	SLC29A1	RS
1-Tetradecanol	CACNA1S	RS
1-Tetradecanol	GABRG1	RS
1-Tetradecanol	GABRP	RS
1-Tetradecanol	CHRNA10	RS
1-Tetradecanol	GRIA2	RS
1-Tetradecanol	GABRA4	RS
1-Tetradecanol	CHRNA3	RS
1-Tetradecanol	GABRB2	RS
1-Tetradecanol	CACNA1C	RS
1-Tetradecanol	CHRNB2	RS
1-Tetradecanol	CACNA1D	RS
1-Tetradecanol	HTR3D	RS
1-Tetradecanol	GABRQ	RS
1-Tetradecanol	CHRNA2	RS
1-Tetradecanol	CHRNA6	RS
1-Tetradecanol	GABRB3	RS
1-Tetradecanol	KCNJ5	RS
1-Tetradecanol	GRIN3A	RS
1-Tetradecanol	HTR3B	RS
1-Tetradecanol	GRIA3	RS
1-Tetradecanol	GABRA5	RS
1-Tetradecanol	SLC29A2	RS
1-Tetradecanol	HTR3E	RS
1-Tetradecanol	GABRA6	RS
1-Tetradecanol	HTR3A	RS
1-Tetradecanol	GABRA1	RS
1-Tetradecanol	CHRNA9	RS
1-Tetradecanol	CHRFAM7A	RS
1-Tetradecanol	CHRNA5	RS
1-Tetradecanol	CHRNB4	RS
1-Tetradecanol	KCNJ9	RS
1-Tetradecanol	HTR3C	RS
1-Tetradecanol	GLRA1	RS
1-Tetradecanol	CACNG1	RS
1-Tetradecanol	ADAM8	RS
1-Tetradecanol	SLC28A3	RS
1-Tetradecanol	ADRA1B	RS
1-Tetradecanol	FOXL2	RS
1-Tetradecanol	DMTN	RS
1-Tetradecanol	KCNMA1	RS
16-Oxoseratenediol	AR	RS
16-Oxoseratenediol	NR3C1	RS
16-Oxoseratenediol	ATP1A1	RS
16-Oxoseratenediol	NOTCH2	RS
20-Hexadecanoylingenol	PRKCA	RS
20-Hexadecanoylingenol	PRKCD	RS
20(S)-Protopanaxadiol	VDR	RS
20(S)-Protopanaxadiol	GC	RS
3,5-Dimethyl-4-Methoxybenzoic Acid	RXRB	RS
3,5-Dimethyl-4-Methoxybenzoic Acid	RARG	RS
3,5-Dimethyl-4-Methoxybenzoic Acid	RARB	RS
3,5-Dimethyl-4-Methoxybenzoic Acid	RXRG	RS
3,5-Dimethyl-4-Methoxybenzoic Acid	PTGS1	RS
3,5-Dimethyl-4-Methoxybenzoic Acid	PTGS2	RS
3,5-Dimethyl-4-Methoxybenzoic Acid	RARA	RS
3,5-Dimethyl-4-Methoxybenzoic Acid	PPARA	RS
3,5-Dimethyl-4-Methoxybenzoic Acid	RXRA	RS
3,5-Dimethyl-4-Methoxybenzoic Acid	TP53	RS
3,5-Dimethyl-4-Methoxybenzoic Acid	TNF	RS
3,5-Dimethyl-4-Methoxybenzoic Acid	HNRNPK	RS
3,5-Dimethyl-4-Methoxybenzoic Acid	COL27A1	RS
3,5-Dimethyl-4-Methoxybenzoic Acid	SERPINB7	RS
Adenine	ADORA2A	RS
Adenine	ADORA2B	RS
Adenine	ADORA3	RS
Adenine	ADORA1	RS
Adenosine	ADORA2A	RS
Adenosine	ADORA2B	RS
Adenosine	ADORA3	RS
Adenosine	ADORA1	RS
Adenosine	FBP1	RS
Adenosine	PRKAB1	RS
Adenosine	ACSS2	RS
Adenosine	POLE	RS
Adenosine	POLE3	RS
Adenosine	ADCY1	RS
Adenosine	POLA1	RS
Adenosine	RRM2B	RS
Adenosine	ADK	RS
Adenosine	PNP	RS
Adenosine	PDE4D	RS
Adenosine	RRM2	RS
Adenosine	PRKAA1	RS
Adenosine	CREB1	RS
Adenosine	ACSS1	RS
Adenosine	PIM1	RS
Adenosine	PYGL	RS
Adenosine	POLE2	RS
Adenosine	HINT1	RS
Adenosine	ACSL1	RS
Adenosine	PDE4B	RS
Adenosine	PRKAB2	RS
Adenosine	POLE4	RS
Adenosine	RRM1	RS
Adenosine	RIPK1	RS
Adenosine	TACR2	RS
Adenosine	CX3CR1	RS
Adenosine	ADA	RS
Adenosine	HAP1	RS
Adenosine Triphosphate	ABCC2	RS
Adenosine Triphosphate	AKT1	RS
Adenosine Triphosphate	ACVR1	RS
Adenosine Triphosphate	ASNA1	RS
Adenosine Triphosphate	ADRBK2	RS
Adenosine Triphosphate	ACSS2	RS
Adenosine Triphosphate	ACVRL1	RS
Adenosine Triphosphate	ADCY1	RS
Adenosine Triphosphate	NT5C2	RS
Adenosine Triphosphate	AMHR2	RS
Adenosine Triphosphate	TNK2	RS
Adenosine Triphosphate	ASNS	RS
Adenosine Triphosphate	ABL2	RS
Adenosine Triphosphate	ADRBK1	RS
Adenosine Triphosphate	PRKAA1	RS
Adenosine Triphosphate	ABCC9	RS
Adenosine Triphosphate	ACSS1	RS
Adenosine Triphosphate	ABL1	RS
Adenosine Triphosphate	AFG3L2	RS
Adenosine Triphosphate	CDK15	RS
Adenosine Triphosphate	ASS1	RS
Adenosine Triphosphate	ACVR1B	RS
Adenosine Triphosphate	ACSL1	RS
Adenosine Triphosphate	ABCA1	RS
Adenosine Triphosphate	NAE1	RS
Adenosine Triphosphate	APAF1	RS
Adenosine Triphosphate	ABCC8	RS
Adenosine Triphosphate	ALK	RS
Adenosine Triphosphate	ABCB11	RS
Adenosine Triphosphate	ABCB1	RS
Adenosine Triphosphate	ABCG1	RS
Adenosine Triphosphate	ARAF	RS
Adenosine Triphosphate	SLC25A4	RS
Adenosine Triphosphate	FBP1	RS
Adenosine Triphosphate	PRKAB1	RS
Adenosine Triphosphate	POLA1	RS
Adenosine Triphosphate	DCK	RS
Adenosine Triphosphate	ADK	RS
Adenosine Triphosphate	PDE4D	RS
Adenosine Triphosphate	CREB1	RS
Adenosine Triphosphate	PIM1	RS
Adenosine Triphosphate	PYGL	RS
Adenosine Triphosphate	HINT1	RS
Adenosine Triphosphate	PDE4B	RS
Adenosine Triphosphate	PRKAB2	RS
Adenosine Triphosphate	RRM1	RS
Adenosine Triphosphate	SLC25A5	RS
Adenosine Triphosphate	SLC25A6	RS
Adenosine Triphosphate	ATF4	RS
Adenosine Triphosphate	SAXO1	RS
Adenosine Triphosphate	XBP1	RS
Adenosine Triphosphate	RALA	RS
Adenosine Triphosphate	UGCG	RS
Adenosine Triphosphate	ASNSD1	RS
Adenosine Triphosphate	SMAD3	RS
Adenosine Triphosphate	CASP9	RS
Adenosine Triphosphate	TGFBR2	RS
Adenosine Triphosphate	UBA3	RS
Adenosine Triphosphate	APRT	RS
Adenosine Triphosphate	PRKAA2	RS
Adenosine Triphosphate	FBP2	RS
Adenosine Triphosphate	AK9	RS
Adenosine Triphosphate	BICD1	RS
Adenosine Triphosphate	JAG1	RS
Adenosine Triphosphate	CTNNB1	RS
Adenosine Triphosphate	VLDLR	RS
Adenosine Triphosphate	ABCA7	RS
Adenosine Triphosphate	ABCG4	RS
Adenosine Triphosphate	GRB2	RS
Alpha-Cadinol	ESR1	RS
Alpha-Cadinol	PGR	RS
Alpha-Cadinol	WNT4	RS
Alpha-Farnesene	KCND1	RS
Alpha-Farnesene	KCNA3	RS
Alpha-Farnesene	PRKAB1	RS
Alpha-Farnesene	ADH1A	RS
Alpha-Farnesene	KCNA10	RS
Alpha-Farnesene	GAMT	RS
Alpha-Farnesene	KCNC3	RS
Alpha-Farnesene	KCNA1	RS
Alpha-Farnesene	KCNA2	RS
Alpha-Farnesene	TPO	RS
Alpha-Farnesene	CAT	RS
Alpha-Farnesene	KCNB1	RS
Alpha-Farnesene	ADH1B	RS
Alpha-Farnesene	DLG4	RS
Alpha-Farnesene	KCNC2	RS
Alpha-Farnesene	KCNC1	RS
Alpha-Farnesene	ADH1C	RS
Alpha-Farnesene	KCNB2	RS
Alpha-Farnesene	KCNA5	RS
Alpha-Farnesene	RNASE1	RS
Alpha-Farnesene	KCND2	RS
Alpha-Farnesene	ALDH2	RS
Alpha-Farnesene	KCNA4	RS
Alpha-Farnesene	KCNA7	RS
Alpha-Farnesene	KCNA6	RS
Alpha-Farnesene	KCND3	RS
Alpha-Farnesene	GUCY1B3	RS
Alpha-Farnesene	GATM	RS
Alpha-Farnesene	KCNK4	RS
Alpha-Farnesene	IYD	RS
Alpha-Farnesene	KCNQ1	RS
Alpha-Guriunene	KCND1	RS
Alpha-Guriunene	KCNA3	RS
Alpha-Guriunene	PRKAB1	RS
Alpha-Guriunene	ADH1A	RS
Alpha-Guriunene	KCNA10	RS
Alpha-Guriunene	GAMT	RS
Alpha-Guriunene	KCNC3	RS
Alpha-Guriunene	KCNA1	RS
Alpha-Guriunene	KCNA2	RS
Alpha-Guriunene	TPO	RS
Alpha-Guriunene	CAT	RS
Alpha-Guriunene	KCNB1	RS
Alpha-Guriunene	ADH1B	RS
Alpha-Guriunene	DLG4	RS
Alpha-Guriunene	KCNC2	RS
Alpha-Guriunene	KCNC1	RS
Alpha-Guriunene	ADH1C	RS
Alpha-Guriunene	KCNB2	RS
Alpha-Guriunene	KCNA5	RS
Alpha-Guriunene	RNASE1	RS
Alpha-Guriunene	KCND2	RS
Alpha-Guriunene	ALDH2	RS
Alpha-Guriunene	KCNA4	RS
Alpha-Guriunene	KCNA7	RS
Alpha-Guriunene	KCNA6	RS
Alpha-Guriunene	KCND3	RS
Alpha-Guriunene	GUCY1B3	RS
Alpha-Guriunene	GATM	RS
Alpha-Guriunene	KCNK4	RS
Alpha-Guriunene	IYD	RS
Alpha-Guriunene	KCNQ1	RS
Aposcopolamine	CHRM3	RS
Aposcopolamine	CHRM1	RS
Aposcopolamine	CHRM5	RS
Aposcopolamine	SI	RS
Aposcopolamine	CHRM2	RS
Aposcopolamine	CHRM4	RS
Aposcopolamine	SLC18A1	RS
Aposcopolamine	SLC18A2	RS
Aposcopolamine	ACE	RS
Aposiopolamine	CHRM3	RS
Aposiopolamine	CHRM1	RS
Aposiopolamine	CHRM5	RS
Aposiopolamine	SI	RS
Aposiopolamine	CHRM2	RS
Aposiopolamine	CHRM4	RS
Beta-Bisabolene	KCND1	RS
Beta-Bisabolene	KCNA3	RS
Beta-Bisabolene	PRKAB1	RS
Beta-Bisabolene	ADH1A	RS
Beta-Bisabolene	KCNA10	RS
Beta-Bisabolene	GAMT	RS
Beta-Bisabolene	KCNC3	RS
Beta-Bisabolene	KCNA1	RS
Beta-Bisabolene	KCNA2	RS
Beta-Bisabolene	TPO	RS
Beta-Bisabolene	CAT	RS
Beta-Bisabolene	KCNB1	RS
Beta-Bisabolene	ADH1B	RS
Beta-Bisabolene	DLG4	RS
Beta-Bisabolene	KCNC2	RS
Beta-Bisabolene	KCNC1	RS
Beta-Bisabolene	ADH1C	RS
Beta-Bisabolene	KCNB2	RS
Beta-Bisabolene	KCNA5	RS
Beta-Bisabolene	RNASE1	RS
Beta-Bisabolene	KCND2	RS
Beta-Bisabolene	ALDH2	RS
Beta-Bisabolene	KCNA4	RS
Beta-Bisabolene	KCNA7	RS
Beta-Bisabolene	KCNA6	RS
Beta-Bisabolene	KCND3	RS
Beta-Bisabolene	GUCY1B3	RS
Beta-Bisabolene	GATM	RS
Beta-Bisabolene	KCNK4	RS
Beta-Bisabolene	IYD	RS
Beta-Bisabolene	KCNQ1	RS
Beta-Elemene	KCND1	RS
Beta-Elemene	KCNA3	RS
Beta-Elemene	PRKAB1	RS
Beta-Elemene	ADH1A	RS
Beta-Elemene	KCNA10	RS
Beta-Elemene	GAMT	RS
Beta-Elemene	KCNC3	RS
Beta-Elemene	KCNA1	RS
Beta-Elemene	KCNA2	RS
Beta-Elemene	TPO	RS
Beta-Elemene	CAT	RS
Beta-Elemene	KCNB1	RS
Beta-Elemene	ADH1B	RS
Beta-Elemene	DLG4	RS
Beta-Elemene	KCNC2	RS
Beta-Elemene	KCNC1	RS
Beta-Elemene	ADH1C	RS
Beta-Elemene	KCNB2	RS
Beta-Elemene	KCNA5	RS
Beta-Elemene	RNASE1	RS
Beta-Elemene	KCND2	RS
Beta-Elemene	ALDH2	RS
Beta-Elemene	KCNA4	RS
Beta-Elemene	KCNA7	RS
Beta-Elemene	KCNA6	RS
Beta-Elemene	KCND3	RS
Beta-Elemene	GUCY1B3	RS
Beta-Elemene	GATM	RS
Beta-Elemene	KCNK4	RS
Beta-Elemene	IYD	RS
Beta-Elemene	KCNQ1	RS
Beta-Humulene	KCND1	RS
Beta-Humulene	KCNA3	RS
Beta-Humulene	PRKAB1	RS
Beta-Humulene	ADH1A	RS
Beta-Humulene	KCNA10	RS
Beta-Humulene	GAMT	RS
Beta-Humulene	KCNC3	RS
Beta-Humulene	KCNA1	RS
Beta-Humulene	KCNA2	RS
Beta-Humulene	TPO	RS
Beta-Humulene	CAT	RS
Beta-Humulene	KCNB1	RS
Beta-Humulene	ADH1B	RS
Beta-Humulene	DLG4	RS
Beta-Humulene	KCNC2	RS
Beta-Humulene	KCNC1	RS
Beta-Humulene	ADH1C	RS
Beta-Humulene	KCNB2	RS
Beta-Humulene	KCNA5	RS
Beta-Humulene	RNASE1	RS
Beta-Humulene	KCND2	RS
Beta-Humulene	ALDH2	RS
Beta-Humulene	KCNA4	RS
Beta-Humulene	KCNA7	RS
Beta-Humulene	KCNA6	RS
Beta-Humulene	KCND3	RS
Beta-Humulene	GUCY1B3	RS
Beta-Humulene	GATM	RS
Beta-Humulene	KCNK4	RS
Beta-Humulene	IYD	RS
Beta-Humulene	KCNQ1	RS
Beta-Santalol	RDH11	RS
Beta-Santalol	RBP3	RS
Beta-Santalol	RETSAT	RS
Beta-Santalol	RDH13	RS
Beta-Santalol	DHRS3	RS
Beta-Santalol	RDH5	RS
Beta-Santalol	ALDH1A3	RS
Beta-Santalol	RDH12	RS
Beta-Santalol	DHRS4	RS
Beta-Santalol	RBP1	RS
Beta-Santalol	ALDH1A1	RS
Beta-Santalol	RLBP1	RS
Beta-Santalol	RDH14	RS
Beta-Santalol	RDH8	RS
Beta-Santalol	LRAT	RS
Beta-Santalol	ALDH1A2	RS
Beta-Santalol	ALDH3A1	RS
Beta-Santalol	RHO	RS
Beta-Santalol	RS1	RS
Beta-Selinene	KCND1	RS
Beta-Selinene	KCNA3	RS
Beta-Selinene	PRKAB1	RS
Beta-Selinene	ADH1A	RS
Beta-Selinene	KCNA10	RS
Beta-Selinene	GAMT	RS
Beta-Selinene	KCNC3	RS
Beta-Selinene	KCNA1	RS
Beta-Selinene	KCNA2	RS
Beta-Selinene	TPO	RS
Beta-Selinene	CAT	RS
Beta-Selinene	KCNB1	RS
Beta-Selinene	ADH1B	RS
Beta-Selinene	DLG4	RS
Beta-Selinene	KCNC2	RS
Beta-Selinene	KCNC1	RS
Beta-Selinene	ADH1C	RS
Beta-Selinene	KCNB2	RS
Beta-Selinene	KCNA5	RS
Beta-Selinene	RNASE1	RS
Beta-Selinene	KCND2	RS
Beta-Selinene	ALDH2	RS
Beta-Selinene	KCNA4	RS
Beta-Selinene	KCNA7	RS
Beta-Selinene	KCNA6	RS
Beta-Selinene	KCND3	RS
Beta-Selinene	GUCY1B3	RS
Beta-Selinene	GATM	RS
Beta-Selinene	KCNK4	RS
Beta-Selinene	IYD	RS
Beta-Selinene	KCNQ1	RS
Bicyclogermacrene	KCND1	RS
Bicyclogermacrene	KCNA3	RS
Bicyclogermacrene	PRKAB1	RS
Bicyclogermacrene	ADH1A	RS
Bicyclogermacrene	KCNA10	RS
Bicyclogermacrene	GAMT	RS
Bicyclogermacrene	KCNC3	RS
Bicyclogermacrene	KCNA1	RS
Bicyclogermacrene	KCNA2	RS
Bicyclogermacrene	TPO	RS
Bicyclogermacrene	CAT	RS
Bicyclogermacrene	KCNB1	RS
Bicyclogermacrene	ADH1B	RS
Bicyclogermacrene	DLG4	RS
Bicyclogermacrene	KCNC2	RS
Bicyclogermacrene	KCNC1	RS
Bicyclogermacrene	ADH1C	RS
Bicyclogermacrene	KCNB2	RS
Bicyclogermacrene	KCNA5	RS
Bicyclogermacrene	RNASE1	RS
Bicyclogermacrene	KCND2	RS
Bicyclogermacrene	ALDH2	RS
Bicyclogermacrene	KCNA4	RS
Bicyclogermacrene	KCNA7	RS
Bicyclogermacrene	KCNA6	RS
Bicyclogermacrene	KCND3	RS
Bicyclogermacrene	GUCY1B3	RS
Bicyclogermacrene	GATM	RS
Bicyclogermacrene	KCNK4	RS
Bicyclogermacrene	IYD	RS
Bicyclogermacrene	KCNQ1	RS
Biotin	SLC5A6	RS
Biotin	PCCA	RS
Biotin	ACACB	RS
Biotin	PC	RS
Biotin	ACACA	RS
Biotin	MCCC1	RS
Biotin	MCCC2	RS
Biotin	HLCS	RS
Biotin	PCCB	RS
Calarene	KCND1	RS
Calarene	KCNA3	RS
Calarene	PRKAB1	RS
Calarene	ADH1A	RS
Calarene	KCNA10	RS
Calarene	GAMT	RS
Calarene	KCNC3	RS
Calarene	KCNA1	RS
Calarene	KCNA2	RS
Calarene	TPO	RS
Calarene	CAT	RS
Calarene	KCNB1	RS
Calarene	ADH1B	RS
Calarene	DLG4	RS
Calarene	KCNC2	RS
Calarene	KCNC1	RS
Calarene	ADH1C	RS
Calarene	KCNB2	RS
Calarene	KCNA5	RS
Calarene	RNASE1	RS
Calarene	KCND2	RS
Calarene	ALDH2	RS
Calarene	KCNA4	RS
Calarene	KCNA7	RS
Calarene	KCNA6	RS
Calarene	KCND3	RS
Calarene	GUCY1B3	RS
Calarene	GATM	RS
Calarene	KCNK4	RS
Calarene	IYD	RS
Calarene	KCNQ1	RS
Campesterol	ESR1	RS
Campesterol	PGR	RS
Choline	PLD1	RS
Choline	PCYT1A	RS
Choline	PCYT1B	RS
Choline	PHOSPHO1	RS
Choline	ACHE	RS
Choline	PLD2	RS
Choline	BCHE	RS
Choline	COLQ	RS
Citronellal	ACHE	RS
Citronellal	BCHE	RS
Citronellal	COLQ	RS
Dauricine	ACHE	RS
Dauricine	CHRNA2	RS
Dauricine	HTR3A	RS
Dauricine	CHRM2	RS
Delta-Elemene	KCND1	RS
Delta-Elemene	KCNA3	RS
Delta-Elemene	PRKAB1	RS
Delta-Elemene	ADH1A	RS
Delta-Elemene	KCNA10	RS
Delta-Elemene	GAMT	RS
Delta-Elemene	KCNC3	RS
Delta-Elemene	KCNA1	RS
Delta-Elemene	KCNA2	RS
Delta-Elemene	TPO	RS
Delta-Elemene	CAT	RS
Delta-Elemene	KCNB1	RS
Delta-Elemene	ADH1B	RS
Delta-Elemene	DLG4	RS
Delta-Elemene	KCNC2	RS
Delta-Elemene	KCNC1	RS
Delta-Elemene	ADH1C	RS
Delta-Elemene	KCNB2	RS
Delta-Elemene	KCNA5	RS
Delta-Elemene	RNASE1	RS
Delta-Elemene	KCND2	RS
Delta-Elemene	ALDH2	RS
Delta-Elemene	KCNA4	RS
Delta-Elemene	KCNA7	RS
Delta-Elemene	KCNA6	RS
Delta-Elemene	KCND3	RS
Delta-Elemene	GUCY1B3	RS
Delta-Elemene	GATM	RS
Delta-Elemene	KCNK4	RS
Delta-Elemene	IYD	RS
Delta-Elemene	KCNQ1	RS
Delta-Guaiene	KCND1	RS
Delta-Guaiene	KCNA3	RS
Delta-Guaiene	PRKAB1	RS
Delta-Guaiene	ADH1A	RS
Delta-Guaiene	KCNA10	RS
Delta-Guaiene	GAMT	RS
Delta-Guaiene	KCNC3	RS
Delta-Guaiene	KCNA1	RS
Delta-Guaiene	KCNA2	RS
Delta-Guaiene	TPO	RS
Delta-Guaiene	CAT	RS
Delta-Guaiene	KCNB1	RS
Delta-Guaiene	ADH1B	RS
Delta-Guaiene	DLG4	RS
Delta-Guaiene	KCNC2	RS
Delta-Guaiene	KCNC1	RS
Delta-Guaiene	ADH1C	RS
Delta-Guaiene	KCNB2	RS
Delta-Guaiene	KCNA5	RS
Delta-Guaiene	RNASE1	RS
Delta-Guaiene	KCND2	RS
Delta-Guaiene	ALDH2	RS
Delta-Guaiene	KCNA4	RS
Delta-Guaiene	KCNA7	RS
Delta-Guaiene	KCNA6	RS
Delta-Guaiene	KCND3	RS
Delta-Guaiene	GUCY1B3	RS
Delta-Guaiene	GATM	RS
Delta-Guaiene	KCNK4	RS
Delta-Guaiene	IYD	RS
Delta-Guaiene	KCNQ1	RS
Deoxyharringtonine	RPL3	RS
Dianthramine	PLA2G2E	RS
Dianthramine	AKR1C2	RS
Dianthramine	PPARG	RS
Dianthramine	MPO	RS
Dianthramine	AKR1C1	RS
Dianthramine	PTGS1	RS
Dianthramine	PTGS2	RS
Dianthramine	ALOX5	RS
Dianthramine	IKBKB	RS
Dianthramine	CHUK	RS
Dianthramine	APOA2	RS
Dianthramine	HSD17B2	RS
Dianthramine	SERPINE1	RS
Dianthramine	IL1B	RS
Dianthramine	IL13	RS
Dianthramine	SERPINB7	RS
Dibutyl Oxalate	NPR1	RS
Dibutyl Phthalate	SCN10A	RS
Dibutyl Phthalate	ACHE	RS
Dibutyl Phthalate	BCHE	RS
Dibutyl Phthalate	COLQ	RS
Elemicin	PDE4A	RS
Elemicin	PDE3A	RS
Elemicin	CACNA1C	RS
Elemicin	TRDMT1	RS
Elemicin	DHFRL1	RS
Elemicin	DHFR	RS
Elemicin	PDE10A	RS
Elemicin	PDE2A	RS
Elemicin	TYMS	RS
Elemicin	SHMT1	RS
Elemicin	PDE3B	RS
Elemicin	DMTN	RS
Elemicin	KCNMA1	RS
Epsilon-Cadinene	KCND1	RS
Epsilon-Cadinene	KCNA3	RS
Epsilon-Cadinene	PRKAB1	RS
Epsilon-Cadinene	ADH1A	RS
Epsilon-Cadinene	KCNA10	RS
Epsilon-Cadinene	GAMT	RS
Epsilon-Cadinene	KCNC3	RS
Epsilon-Cadinene	KCNA1	RS
Epsilon-Cadinene	KCNA2	RS
Epsilon-Cadinene	TPO	RS
Epsilon-Cadinene	CAT	RS
Epsilon-Cadinene	KCNB1	RS
Epsilon-Cadinene	ADH1B	RS
Epsilon-Cadinene	DLG4	RS
Epsilon-Cadinene	KCNC2	RS
Epsilon-Cadinene	KCNC1	RS
Epsilon-Cadinene	ADH1C	RS
Epsilon-Cadinene	KCNB2	RS
Epsilon-Cadinene	KCNA5	RS
Epsilon-Cadinene	RNASE1	RS
Epsilon-Cadinene	KCND2	RS
Epsilon-Cadinene	ALDH2	RS
[truncated: 2,677 more rows]
