# Supplementary material for: A Comprehensive Network Pharmacology-Based Strategy to Investigate Multiple Mechanisms of HeChan Tablet on Lung Cancer
Source: Evid Based Complement Alternat Med. 2020 May 30;2020:7658342. doi: 10.1155/2020/7658342 (PMC7277035; doi:10.1155/2020/7658342)
Supplement: Supplementary Materials — Supplementary file 1: compounds and putative target genes of HCT. Supplementary file 2: 507 common target genes among HCT and related genes of lung cancer. Supplementary file 3: 34 common target genes among HCT and known therapeutic genes of lung cancer. Supplementary file 4: hub gene information of common HCT-related genes of lung cancer PPI network. Supplementary file 5: hub gene information of HCT-known therapeutic genes of lung cancer PPI network, Supplementary file 6: information of hub genes filtered by PPI networks. [file 7658342.f1.zip › 7658342.f1/Supplementary file 2_ECAM_3084838.xlsx]

## Sheet: Sheet1
common.target genes between HCT and lung cancer
ACHE
ACY1
ADA
ADH1A
ADH1B
ADH1C
ADORA2A
ADRA1A
ADRB1
ADRB2
ADSSL1
AGXT
AHR
AKR1B1
AKT1
ALDH2
ANXA1
AR
ARG1
ARG2
ASCL1
ASNS
ASPH
ASS1
ATF1
ATF2
ATF3
ATF4
ATF6
AZIN2
BAX
BCHE
BCL2
CACNA1A
CACNA2D2
CAD
CALM1
CASP3
CASP8
CASP9
CAT
CBS
CBSL
CCNA2
CCNB1
CDK2
CFTR
CHRM1
CHRM3
CHRNA2
CHRNA7
COMT
CPS1
CREB1
CRTAP
CXCL8
CYCS
CYP27B1
DAB2
DDC
DDIT3
DLL1
DNMT1
DRD1
DRD2
DRD3
DRD4
EPHX2
EPRS
ESR1
F10
FABP5
FOS
FOSL1
FOSL2
GABRB3
GC
GCSH
GLDC
GLRA1
GLUL
GLYAT
GPT
GRIN2B
GRIN2D
GSS
GSTP1
HAL
HAP1
HCAR2
HCAR3
HDC
HIF1A
HIF1AN
HSP90AB1
HTR3A
IGF2
IL13
IL1B
IL2
IL2RA
JDP2
JUN
KCNA3
KCNA5
KCNQ1
LARS
LGSN
LTA
MAOA
MAOB
MAP2
MMP9
MPO
MTR
MTRR
NCOA1
NCOA2
NFATC1
NFS1
NNMT
NOS2
NOS3
NOX5
NR3C2
OAZ1
OPRK1
OPRM1
P4HA2
P4HB
PAH
PARK7
PCYT1A
PGR
PIK3CG
PIM1
PLAT
PLAU
PLD2
PLG
PNP
POLB
PON1
PPARG
PPIA
PPIG
PRKAB1
PRKCA
PRODH
PTGS1
PTGS2
RELA
RIPK1
RXRA
RXRB
SCN5A
SDS
SHMT1
SHMT2
SLC1A5
SLC22A1
SLC6A2
SLC6A3
SLC7A1
SLC7A4
SRR
TAT
TFAP2B
TGFB1
THBD
TLR4
TNF
TNNC1
TOP2A
TP53
TPH2
TPO
TRAF2
TRPA1
TRPM8
TWIST1
TYMS
VARS2
VDAC1
VDAC2
VDR
VEGFA
WNT11
ACACA
ACP1
ADRA2B
ADRB3
AGT
AGTR1
AGTR2
AOC3
APRT
ATM
AVP
AVPR1A
AVPR2
BGLAP
CALCA
CHRNA1
CHRNA3
CHRNA4
CHRNA5
CHRNA6
CHRNA9
CHRNB3
CHRNB4
CX3CR1
CYP17A1
CYP19A1
CYP2B6
ESR2
F2
F3
F9
GABRA3
HDAC2
HPRT1
HRH1
HRH2
HTR1B
HTR4
INS
ITPR1
KCNN4
MAPK1
MTAP
NQO1
NT5E
PDE2A
PDE4A
PDE4D
PDE6A
PIK3CA
PIK3CB
PIK3CD
PIK3R1
PIK3R2
PIK3R3
POLA2
PRKAA1
PRKAA2
PRKDC
PROC
PROS1
RYR1
SAXO1
SCT
SRPK2
TLR7
UGCG
WLS
WNT4
ABCA1
ABCB1
ABCC2
ABCC8
ABCG1
ABCG4
ABL1
ABL2
ACE
ACO2
ACSL3
ACSL4
ACSS2
ACVR1B
ACVRL1
ADAM8
ADCY1
ADCYAP1
ADORA3
AHSA1
AIFM1
AKR1C1
AKR1C2
AKR1C3
ALDH1A1
ALDH1A2
ALDH1A3
ALDH3A1
ALK
ALOX5
APAF1
ARAF
CACNA1D
CASP1
CD34
CEBPA
CES1
CHUK
CKB
CNR1
COX1
COX2
COX5A
COX8A
CTNNB1
CUBN
CYP1A1
CYP1A2
CYP1B1
CYP3A4
DCK
DHFR
DLD
DPP4
DPYD
ENPP1
FADS1
FADS2
FBP1
GABRQ
GPRC5A
GRB2
GRIA3
GSR
GSTM1
GSTM2
HDAC9
HINT1
HMOX1
HNRNPK
HSD17B6
HSP90AA1
ICAM1
IFNG
IKBKB
IKBKE
IL4I1
IMPDH1
INSR
INSRR
JAG1
JMJD6
KCNJ3
KCNJ5
KCNJ6
KCNJ9
KCNMA1
KDR
LPCAT1
MAP2K4
MAPK8
MMP1
MTHFR
MUT
NFKBIA
NOS1
NOTCH2
NR0B1
NR1I2
NR1I3
NR3C1
NT5C2
ODC1
OGDH
PAOX
PC
PLA2G1B
POLE
POLE4
POR
PPARA
PPARD
PPP3CA
PRKACA
PRKCD
RALA
RARA
RARB
RARG
RBP1
RDH12
RHO
RRM1
RRM2
RRM2B
RS1
RXRG
SCN7A
SCN9A
SDHA
SDHAF2
SDHB
SDHC
SELE
SERPINE1
SLC25A4
SLC25A5
SLC29A1
SLC6A8
SLC9A1
SLIT2
SMAD3
SMS
SRD5A2
STAT1
SUCLG2
TCN1
TGFBR2
TNK2
TOP1
TRPV1
TXNRD1
TYR
TYRP1
VCAM1
WDHD1
XBP1
XDH
ABCG2
BCL2L1
BIRC5
CAV1
CCL2
CCND1
CD40LG
CDKN1A
CHEK1
CHEK2
CIT
CLDN4
COL1A1
COL3A1
CRP
CTSD
CXCL10
CXCL11
DUOX2
E2F1
E2F2
EGF
EGFR
EIF2AK1
EIF6
ELK1
ERBB2
ERBB3
FASN
GJA1
GSK3B
HK2
HSF1
HSPA5
HSPB1
IGFBP3
IL10
IL1A
IL6
IRF1
MAPK14
MGAM
MMP2
MMP3
MTOR
MYC
NCF1
NFE2L2
PARP1
PLA2G4A
PRKCB
PTEN
PTGER3
RAF1
RASA1
RASSF1
RB1
RUNX1T1
RUNX2
SOD1
SULT1E1
CDC42
PTPN1
PYGM
SPP1
APP
CASP7
GSTA1
GSTA2
IL4
MCL1
MDM2
MET
NUF2
PCNA
PPP2CA
PTGES
SEC14L2
SOAT1
TOP2B
HTR1D
TERT
TUBA1B
TUBA1C
TUBA3C
TUBA3D
TUBA4A
TUBB
TUBB1
TUBB3
TUBB4A
TUBB4B

## Sheet: Sheet 2
Gene	Compounds	disease	Herbs
ACHE	Ephedrine	lungcancer	BX
ACHE	Choline	lungcancer	BX
ACHE	Dauricine	lungcancer	BX
ACY1	L-Alanine	lungcancer	BX
ACY1	Valine	lungcancer	BX
ADA	Beta-Aminobutyric Acid	lungcancer	BX
ADA	Gamma-Aminobutyric Acid	lungcancer	BX
ADH1A	1-Octene	lungcancer	BX
ADH1B	1-Octene	lungcancer	BX
ADH1C	Stigmasterol	lungcancer	BX
ADH1C	1-Octene	lungcancer	BX
ADORA2A	Guanosine	lungcancer	BX
ADRA1A	beta-sitosterol	lungcancer	BX
ADRA1A	Ephedrine	lungcancer	BX
ADRA1A	Stigmasterol	lungcancer	BX
ADRB1	Ephedrine	lungcancer	BX
ADRB1	Cavidine	lungcancer	BX
ADRB1	Stigmasterol	lungcancer	BX
ADRB2	(3S,6S)-3-(benzyl)-6-(4-hydroxybenzyl)piperazine-2,5-quinone	lungcancer	BX
ADRB2	beta-sitosterol	lungcancer	BX
ADRB2	Ephedrine	lungcancer	BX
ADRB2	coniferin	lungcancer	BX
ADRB2	Cavidine	lungcancer	BX
ADRB2	Stigmasterol	lungcancer	BX
ADSSL1	L-Alanine	lungcancer	BX
ADSSL1	Valine	lungcancer	BX
AGXT	(S)-Serine	lungcancer	BX
AGXT	Valine	lungcancer	BX
AGXT	L-Alanine	lungcancer	BX
AHR	baicalein	lungcancer	BX
AKR1B1	Stigmasterol	lungcancer	BX
AKT1	baicalein	lungcancer	BX
ALDH2	1-Octene	lungcancer	BX
ANXA1	Trigonelline	lungcancer	BX
AR	baicalein	lungcancer	BX
AR	(3S,6S)-3-(benzyl)-6-(4-hydroxybenzyl)piperazine-2,5-quinone	lungcancer	BX
AR	coniferin	lungcancer	BX
ARG1	Valine	lungcancer	BX
ARG1	L-Alanine	lungcancer	BX
ARG2	L-Alanine	lungcancer	BX
ARG2	Valine	lungcancer	BX
ARG2	(S)-Serine	lungcancer	BX
ASCL1	Beta-Aminobutyric Acid	lungcancer	BX
ASCL1	Gamma-Aminobutyric Acid	lungcancer	BX
ASNS	L-Alanine	lungcancer	BX
ASNS	Valine	lungcancer	BX
ASPH	Valine	lungcancer	BX
ASPH	L-Alanine	lungcancer	BX
ASS1	L-Alanine	lungcancer	BX
ASS1	(S)-Serine	lungcancer	BX
ASS1	Valine	lungcancer	BX
ATF1	Ephedrine	lungcancer	BX
ATF2	Ephedrine	lungcancer	BX
ATF3	Ephedrine	lungcancer	BX
ATF4	Ephedrine	lungcancer	BX
ATF6	Ephedrine	lungcancer	BX
AZIN2	L-Alanine	lungcancer	BX
AZIN2	Valine	lungcancer	BX
AZIN2	(S)-Serine	lungcancer	BX
BAX	baicalein	lungcancer	BX
BCHE	Choline	lungcancer	BX
BCHE	Ephedrine	lungcancer	BX
BCL2	beta-sitosterol	lungcancer	BX
BCL2	baicalein	lungcancer	BX
BCL2	Trigonelline	lungcancer	BX
CACNA1A	Gamma-Aminobutyric Acid	lungcancer	BX
CACNA1A	Beta-Aminobutyric Acid	lungcancer	BX
CACNA2D2	Beta-Aminobutyric Acid	lungcancer	BX
CACNA2D2	Gamma-Aminobutyric Acid	lungcancer	BX
CAD	Valine	lungcancer	BX
CAD	L-Alanine	lungcancer	BX
CALM1	(3S,6S)-3-(benzyl)-6-(4-hydroxybenzyl)piperazine-2,5-quinone	lungcancer	BX
CALM1	baicalein	lungcancer	BX
CALM1	Cavidine	lungcancer	BX
CASP3	baicalein	lungcancer	BX
CASP3	beta-sitosterol	lungcancer	BX
CASP8	beta-sitosterol	lungcancer	BX
CASP9	beta-sitosterol	lungcancer	BX
CAT	1-Octene	lungcancer	BX
CBS	Methionine	lungcancer	BX
CBS	L-Alanine	lungcancer	BX
CBS	(S)-Serine	lungcancer	BX
CBSL	L-Alanine	lungcancer	BX
CBSL	(S)-Serine	lungcancer	BX
CCNA2	coniferin	lungcancer	BX
CCNB1	baicalein	lungcancer	BX
CDK2	coniferin	lungcancer	BX
CFTR	Trigonelline	lungcancer	BX
CHRM1	Stigmasterol	lungcancer	BX
CHRM1	beta-sitosterol	lungcancer	BX
CHRM1	coniferin	lungcancer	BX
CHRM1	Cavidine	lungcancer	BX
CHRM3	Stigmasterol	lungcancer	BX
CHRM3	beta-sitosterol	lungcancer	BX
CHRM3	Cavidine	lungcancer	BX
CHRM3	coniferin	lungcancer	BX
CHRNA2	beta-sitosterol	lungcancer	BX
CHRNA2	Dauricine	lungcancer	BX
CHRNA7	beta-sitosterol	lungcancer	BX
CHRNA7	coniferin	lungcancer	BX
CHRNA7	Stigmasterol	lungcancer	BX
COMT	Methionine	lungcancer	BX
CPS1	L-Alanine	lungcancer	BX
CPS1	Valine	lungcancer	BX
CREB1	Ephedrine	lungcancer	BX
CRTAP	Proline	lungcancer	BX
CXCL8	(S)-Tyrosine	lungcancer	BX
CYCS	baicalein	lungcancer	BX
CYP27B1	Gamma-Sitosterol	lungcancer	BX
DAB2	Ephedrine	lungcancer	BX
DDC	Phenylalanine	lungcancer	BX
DDC	(S)-Tyrosine	lungcancer	BX
DDIT3	Ephedrine	lungcancer	BX
DLL1	Gamma-Aminobutyric Acid	lungcancer	BX
DLL1	Beta-Aminobutyric Acid	lungcancer	BX
DNMT1	Guanosine	lungcancer	BX
DRD1	Cavidine	lungcancer	BX
DRD1	Ephedrine	lungcancer	BX
DRD1	(S)-Tyrosine	lungcancer	BX
DRD1	beta-sitosterol	lungcancer	BX
DRD2	(S)-Tyrosine	lungcancer	BX
DRD3	(S)-Tyrosine	lungcancer	BX
DRD4	(S)-Tyrosine	lungcancer	BX
EPHX2	Gamma-Aminobutyric Acid	lungcancer	BX
EPHX2	Beta-Aminobutyric Acid	lungcancer	BX
EPRS	Proline	lungcancer	BX
ESR1	coniferin	lungcancer	BX
ESR1	Gamma-Sitosterol	lungcancer	BX
F10	Baicalin	lungcancer	BX
F10	Cavidine	lungcancer	BX
FABP5	baicalein	lungcancer	BX
FOS	baicalein	lungcancer	BX
FOS	Ephedrine	lungcancer	BX
FOSL1	baicalein	lungcancer	BX
FOSL2	baicalein	lungcancer	BX
GABRB3	Coniine	lungcancer	BX
GC	Gamma-Sitosterol	lungcancer	BX
GCSH	L-Alanine	lungcancer	BX
GCSH	Valine	lungcancer	BX
GLDC	L-Alanine	lungcancer	BX
GLDC	Valine	lungcancer	BX
GLRA1	L-Alanine	lungcancer	BX
GLRA1	Valine	lungcancer	BX
GLUL	Valine	lungcancer	BX
GLUL	L-Alanine	lungcancer	BX
GLYAT	Valine	lungcancer	BX
GLYAT	L-Alanine	lungcancer	BX
GPT	(S)-Serine	lungcancer	BX
GPT	L-Alanine	lungcancer	BX
GPT	Valine	lungcancer	BX
GRIN2B	Beta-Aminobutyric Acid	lungcancer	BX
GRIN2B	Gamma-Aminobutyric Acid	lungcancer	BX
GRIN2D	Beta-Aminobutyric Acid	lungcancer	BX
GRIN2D	Gamma-Aminobutyric Acid	lungcancer	BX
GSS	Valine	lungcancer	BX
GSS	L-Alanine	lungcancer	BX
GSTP1	Methionine	lungcancer	BX
GSTP1	(S)-Serine	lungcancer	BX
HAL	L-Histidine	lungcancer	BX
HAP1	Beta-Aminobutyric Acid	lungcancer	BX
HAP1	Gamma-Aminobutyric Acid	lungcancer	BX
HCAR2	Trigonelline	lungcancer	BX
HCAR3	Trigonelline	lungcancer	BX
HDC	L-Histidine	lungcancer	BX
HIF1A	baicalein	lungcancer	BX
HIF1AN	Valine	lungcancer	BX
HIF1AN	L-Alanine	lungcancer	BX
HSP90AB1	baicalein	lungcancer	BX
HSP90AB1	beta-sitosterol	lungcancer	BX
HSP90AB1	Cavidine	lungcancer	BX
HTR3A	Cavidine	lungcancer	BX
HTR3A	Dauricine	lungcancer	BX
IGF2	baicalein	lungcancer	BX
IL13	Trigonelline	lungcancer	BX
IL1B	Trigonelline	lungcancer	BX
IL2	Ephedrine	lungcancer	BX
IL2RA	Ephedrine	lungcancer	BX
JDP2	Ephedrine	lungcancer	BX
JUN	beta-sitosterol	lungcancer	BX
JUN	Ephedrine	lungcancer	BX
KCNA3	1-Octene	lungcancer	BX
KCNA5	1-Octene	lungcancer	BX
KCNQ1	1-Octene	lungcancer	BX
LARS	Valine	lungcancer	BX
LARS	L-Alanine	lungcancer	BX
LGSN	Valine	lungcancer	BX
LGSN	L-Alanine	lungcancer	BX
LTA	Ephedrine	lungcancer	BX
MAOA	Stigmasterol	lungcancer	BX
MAOB	Stigmasterol	lungcancer	BX
MAP2	beta-sitosterol	lungcancer	BX
MMP9	baicalein	lungcancer	BX
MPO	baicalein	lungcancer	BX
MTR	Methionine	lungcancer	BX
MTRR	(S)-Serine	lungcancer	BX
MTRR	Methionine	lungcancer	BX
NCOA1	baicalein	lungcancer	BX
NCOA1	Stigmasterol	lungcancer	BX
NCOA1	coniferin	lungcancer	BX
NCOA2	10,13-eicosadienoic	lungcancer	BX
NCOA2	baicalein	lungcancer	BX
NCOA2	Stigmasterol	lungcancer	BX
NCOA2	coniferin	lungcancer	BX
NCOA2	gondoic acid	lungcancer	BX
NCOA2	beta-sitosterol	lungcancer	BX
NFATC1	Ephedrine	lungcancer	BX
NFATC1	baicalein	lungcancer	BX
NFS1	Valine	lungcancer	BX
NFS1	L-Alanine	lungcancer	BX
NFS1	(S)-Serine	lungcancer	BX
NNMT	Trigonelline	lungcancer	BX
NOS2	(S)-Serine	lungcancer	BX
NOS3	(S)-Serine	lungcancer	BX
NOX5	baicalein	lungcancer	BX
NR3C2	Stigmasterol	lungcancer	BX
NR3C2	Cycloartenol	lungcancer	BX
NR3C2	24-Ethylcholest-4-en-3-one	lungcancer	BX
OAZ1	L-Alanine	lungcancer	BX
OAZ1	Valine	lungcancer	BX
OPRK1	9-Heptadecanol	lungcancer	BX
OPRM1	Cavidine	lungcancer	BX
OPRM1	beta-sitosterol	lungcancer	BX
OPRM1	coniferin	lungcancer	BX
P4HA2	Proline	lungcancer	BX
P4HB	Proline	lungcancer	BX
PAH	(S)-Tyrosine	lungcancer	BX
PAH	Phenylalanine	lungcancer	BX
PARK7	Ephedrine	lungcancer	BX
PCYT1A	Choline	lungcancer	BX
PGR	Stigmasterol	lungcancer	BX
PGR	24-Ethylcholest-4-en-3-one	lungcancer	BX
PGR	Gamma-Sitosterol	lungcancer	BX
PGR	beta-sitosterol	lungcancer	BX
PIK3CG	beta-sitosterol	lungcancer	BX
PIK3CG	baicalein	lungcancer	BX
PIM1	coniferin	lungcancer	BX
PLAT	Beta-Aminobutyric Acid	lungcancer	BX
PLAT	Gamma-Aminobutyric Acid	lungcancer	BX
PLAT	Trigonelline	lungcancer	BX
PLAU	Stigmasterol	lungcancer	BX
PLD2	Choline	lungcancer	BX
PLG	Gamma-Aminobutyric Acid	lungcancer	BX
PLG	Beta-Aminobutyric Acid	lungcancer	BX
PNP	beta-D-Ribofuranoside, xanthine-9	lungcancer	BX
POLB	Guanosine	lungcancer	BX
PON1	beta-sitosterol	lungcancer	BX
PPARG	coniferin	lungcancer	BX
PPARG	Trigonelline	lungcancer	BX
PPIA	Proline	lungcancer	BX
PPIA	L-Arginine	lungcancer	BX
PPIG	Proline	lungcancer	BX
PRKAB1	1-Octene	lungcancer	BX
PRKCA	beta-sitosterol	lungcancer	BX
PRODH	Proline	lungcancer	BX
PTGS1	baicalein	lungcancer	BX
PTGS1	Stigmasterol	lungcancer	BX
PTGS1	10,13-eicosadienoic	lungcancer	BX
PTGS1	Cavidine	lungcancer	BX
PTGS1	gondoic acid	lungcancer	BX
PTGS1	beta-sitosterol	lungcancer	BX
PTGS1	Trigonelline	lungcancer	BX
PTGS2	Stigmasterol	lungcancer	BX
PTGS2	beta-D-Ribofuranoside, xanthine-9	lungcancer	BX
PTGS2	Cavidine	lungcancer	BX
PTGS2	(3S,6S)-3-(benzyl)-6-(4-hydroxybenzyl)piperazine-2,5-quinone	lungcancer	BX
PTGS2	coniferin	lungcancer	BX
PTGS2	Trigonelline	lungcancer	BX
PTGS2	baicalein	lungcancer	BX
PTGS2	beta-sitosterol	lungcancer	BX
RELA	baicalein	lungcancer	BX
RIPK1	Beta-Aminobutyric Acid	lungcancer	BX
RIPK1	Gamma-Aminobutyric Acid	lungcancer	BX
RXRA	Stigmasterol	lungcancer	BX
RXRA	Cavidine	lungcancer	BX
RXRA	Ephedrine	lungcancer	BX
RXRB	Cavidine	lungcancer	BX
SCN5A	Stigmasterol	lungcancer	BX
SCN5A	beta-sitosterol	lungcancer	BX
SCN5A	coniferin	lungcancer	BX
SCN5A	Cavidine	lungcancer	BX
SDS	(S)-Serine	lungcancer	BX
SDS	L-Alanine	lungcancer	BX
SHMT1	Valine	lungcancer	BX
SHMT1	L-Alanine	lungcancer	BX
SHMT2	Valine	lungcancer	BX
SHMT2	L-Alanine	lungcancer	BX
SLC1A5	L-Alanine	lungcancer	BX
SLC1A5	Valine	lungcancer	BX
SLC22A1	Ephedrine	lungcancer	BX
SLC6A2	Stigmasterol	lungcancer	BX
SLC6A2	Ephedrine	lungcancer	BX
SLC6A3	Stigmasterol	lungcancer	BX
SLC6A3	Ephedrine	lungcancer	BX
SLC7A1	(S)-Serine	lungcancer	BX
SLC7A1	Valine	lungcancer	BX
SLC7A1	L-Alanine	lungcancer	BX
SLC7A4	L-Alanine	lungcancer	BX
SLC7A4	(S)-Serine	lungcancer	BX
SLC7A4	Valine	lungcancer	BX
SRR	(S)-Serine	lungcancer	BX
SRR	L-Alanine	lungcancer	BX
TAT	Phenylalanine	lungcancer	BX
TFAP2B	L-Alanine	lungcancer	BX
TFAP2B	Valine	lungcancer	BX
TGFB1	beta-sitosterol	lungcancer	BX
THBD	Trigonelline	lungcancer	BX
TLR4	Valine	lungcancer	BX
TLR4	L-Alanine	lungcancer	BX
TNF	Ephedrine	lungcancer	BX
TNNC1	Valine	lungcancer	BX
TNNC1	L-Alanine	lungcancer	BX
TOP2A	Cavidine	lungcancer	BX
TP53	baicalein	lungcancer	BX
TPH2	(S)-Tyrosine	lungcancer	BX
TPO	1-Octene	lungcancer	BX
TRAF2	Methionine	lungcancer	BX
TRPA1	9-Heptadecanol	lungcancer	BX
TRPM8	9-Heptadecanol	lungcancer	BX
TWIST1	Proline	lungcancer	BX
TWIST1	L-Arginine	lungcancer	BX
TYMS	L-Alanine	lungcancer	BX
TYMS	Valine	lungcancer	BX
VARS2	Valine	lungcancer	BX
VARS2	L-Alanine	lungcancer	BX
VDAC1	Valine	lungcancer	BX
VDAC1	L-Alanine	lungcancer	BX
VDAC2	L-Alanine	lungcancer	BX
VDAC2	Valine	lungcancer	BX
VDR	Gamma-Sitosterol	lungcancer	BX
VEGFA	baicalein	lungcancer	BX
WNT11	Ephedrine	lungcancer	BX
ACACA	Bufothionine	lungcancer	GCP
ACHE	Morphine	lungcancer	GCP
ACP1	Bufothionine	lungcancer	GCP
ADA	Gamma-Aminobutyric Acid	lungcancer	GCP
ADA	Dehydrobufotenine	lungcancer	GCP
ADORA2A	Dehydrobufotenine	lungcancer	GCP
ADRA1A	Adrenaline	lungcancer	GCP
ADRA1A	Bufothionine	lungcancer	GCP
ADRA1A	Serotonin	lungcancer	GCP
ADRA2B	Bufothionine	lungcancer	GCP
ADRA2B	Adrenaline	lungcancer	GCP
ADRA2B	Serotonin	lungcancer	GCP
ADRB1	Adrenaline	lungcancer	GCP
ADRB1	Bufothionine	lungcancer	GCP
ADRB2	Bufothionine	lungcancer	GCP
ADRB2	Adrenaline	lungcancer	GCP
ADRB3	Adrenaline	lungcancer	GCP
ADRB3	Bufothionine	lungcancer	GCP
AGT	Tryptanthrin	lungcancer	GCP
AGTR1	Tryptanthrin	lungcancer	GCP
AGTR1	Bufothionine	lungcancer	GCP
AGTR2	Tryptanthrin	lungcancer	GCP
AOC3	Bufothionine	lungcancer	GCP
APRT	Bufothionine	lungcancer	GCP
ASCL1	Gamma-Aminobutyric Acid	lungcancer	GCP
ATM	Dehydrobufotenine	lungcancer	GCP
AVP	Tryptanthrin	lungcancer	GCP
AVPR1A	Tryptanthrin	lungcancer	GCP
AVPR2	Tryptanthrin	lungcancer	GCP
BCHE	Morphine	lungcancer	GCP
BGLAP	Tryptanthrin	lungcancer	GCP
CACNA1A	Gamma-Aminobutyric Acid	lungcancer	GCP
CACNA2D2	Gamma-Aminobutyric Acid	lungcancer	GCP
CALCA	Adrenaline	lungcancer	GCP
CALCA	Serotonin	lungcancer	GCP
CALCA	Bufothionine	lungcancer	GCP
CHRNA1	Morphine	lungcancer	GCP
CHRNA2	Morphine	lungcancer	GCP
CHRNA3	Morphine	lungcancer	GCP
CHRNA4	Morphine	lungcancer	GCP
CHRNA5	Morphine	lungcancer	GCP
CHRNA6	Morphine	lungcancer	GCP
CHRNA7	Bufothionine	lungcancer	GCP
CHRNA7	Morphine	lungcancer	GCP
CHRNA7	Serotonin	lungcancer	GCP
CHRNA7	Adrenaline	lungcancer	GCP
CHRNA9	Morphine	lungcancer	GCP
CHRNB3	Morphine	lungcancer	GCP
CHRNB4	Morphine	lungcancer	GCP
CX3CR1	Dehydrobufotenine	lungcancer	GCP
CYP17A1	Dehydrobufotenine	lungcancer	GCP
CYP19A1	Dehydrobufotenine	lungcancer	GCP
CYP27B1	Cholesterol	lungcancer	GCP
CYP27B1	7-Dehydrocholesterol	lungcancer	GCP
CYP27B1	Gamma-Sitosterol	lungcancer	GCP
CYP2B6	Bufothionine	lungcancer	GCP
DAB2	Tryptanthrin	lungcancer	GCP
DLL1	Gamma-Aminobutyric Acid	lungcancer	GCP
EPHX2	Gamma-Aminobutyric Acid	lungcancer	GCP
ESR1	Dehydrobufotenine	lungcancer	GCP
ESR1	Serotonin	lungcancer	GCP
ESR1	Campesterol	lungcancer	GCP
ESR1	Gamma-Sitosterol	lungcancer	GCP
ESR2	Serotonin	lungcancer	GCP
F10	Tryptanthrin	lungcancer	GCP
F2	Tryptanthrin	lungcancer	GCP
F3	Tryptanthrin	lungcancer	GCP
F9	Tryptanthrin	lungcancer	GCP
GABRA3	Tryptanthrin	lungcancer	GCP
GC	Cholesterol	lungcancer	GCP
GC	7-Dehydrocholesterol	lungcancer	GCP
GC	Gamma-Sitosterol	lungcancer	GCP
GRIN2B	Gamma-Aminobutyric Acid	lungcancer	GCP
GRIN2D	Gamma-Aminobutyric Acid	lungcancer	GCP
HAP1	Dehydrobufotenine	lungcancer	GCP
HAP1	Gamma-Aminobutyric Acid	lungcancer	GCP
HDAC2	Dehydrobufotenine	lungcancer	GCP
HPRT1	Bufothionine	lungcancer	GCP
HRH1	Bufothionine	lungcancer	GCP
HRH2	Bufothionine	lungcancer	GCP
HSP90AB1	Bufothionine	lungcancer	GCP
HTR1B	Tryptanthrin	lungcancer	GCP
HTR3A	Tryptanthrin	lungcancer	GCP
HTR4	Tryptanthrin	lungcancer	GCP
INS	Adrenaline	lungcancer	GCP
INS	Serotonin	lungcancer	GCP
INS	Bufothionine	lungcancer	GCP
ITPR1	Dehydrobufotenine	lungcancer	GCP
JUN	Tryptanthrin	lungcancer	GCP
KCNN4	Morphine	lungcancer	GCP
LTA	Adrenaline	lungcancer	GCP
MAPK1	Adrenaline	lungcancer	GCP
MTAP	Bufothionine	lungcancer	GCP
NQO1	Tryptanthrin	lungcancer	GCP
NR3C2	Dehydrobufotenine	lungcancer	GCP
NT5E	Dehydrobufotenine	lungcancer	GCP
OPRK1	Dehydrobufotenine	lungcancer	GCP
OPRK1	Morphine	lungcancer	GCP
OPRM1	Morphine	lungcancer	GCP
OPRM1	Tryptanthrin	lungcancer	GCP
PAH	Adrenaline	lungcancer	GCP
PDE2A	Dehydrobufotenine	lungcancer	GCP
PDE4A	Dehydrobufotenine	lungcancer	GCP
PDE4D	Dehydrobufotenine	lungcancer	GCP
PDE6A	Dehydrobufotenine	lungcancer	GCP
PGR	Gamma-Sitosterol	lungcancer	GCP
PGR	Dehydrobufotenine	lungcancer	GCP
PGR	Campesterol	lungcancer	GCP
PIK3CA	Dehydrobufotenine	lungcancer	GCP
PIK3CA	Adrenaline	lungcancer	GCP
PIK3CB	Dehydrobufotenine	lungcancer	GCP
PIK3CD	Dehydrobufotenine	lungcancer	GCP
PIK3R1	Adrenaline	lungcancer	GCP
PIK3R1	Dehydrobufotenine	lungcancer	GCP
PIK3R2	Adrenaline	lungcancer	GCP
PIK3R3	Adrenaline	lungcancer	GCP
PLAT	Gamma-Aminobutyric Acid	lungcancer	GCP
PLG	Gamma-Aminobutyric Acid	lungcancer	GCP
PNP	Bufothionine	lungcancer	GCP
POLA2	Dehydrobufotenine	lungcancer	GCP
PRKAA1	Bufothionine	lungcancer	GCP
PRKAA2	Bufothionine	lungcancer	GCP
PRKDC	Dehydrobufotenine	lungcancer	GCP
PROC	Tryptanthrin	lungcancer	GCP
PROS1	Tryptanthrin	lungcancer	GCP
PTGS1	Tryptanthrin	lungcancer	GCP
PTGS2	Tryptanthrin	lungcancer	GCP
RIPK1	Dehydrobufotenine	lungcancer	GCP
RIPK1	Gamma-Aminobutyric Acid	lungcancer	GCP
RXRA	Adrenaline	lungcancer	GCP
RYR1	Dehydrobufotenine	lungcancer	GCP
SAXO1	Bufothionine	lungcancer	GCP
SCN5A	Morphine	lungcancer	GCP
SCT	Bufothionine	lungcancer	GCP
SLC22A1	Bufothionine	lungcancer	GCP
SLC6A2	Bufothionine	lungcancer	GCP
SRPK2	Bufothionine	lungcancer	GCP
TLR7	Bufothionine	lungcancer	GCP
TNF	Adrenaline	lungcancer	GCP
UGCG	Bufothionine	lungcancer	GCP
VDR	Gamma-Sitosterol	lungcancer	GCP
VDR	7-Dehydrocholesterol	lungcancer	GCP
VDR	Cholesterol	lungcancer	GCP
WLS	Tryptanthrin	lungcancer	GCP
WLS	Morphine	lungcancer	GCP
WNT4	Dehydrobufotenine	lungcancer	GCP
ADH1C	Stigmasterol	lungcancer	YXC
ADRA1A	beta-sitosterol	lungcancer	YXC
ADRA1A	Stigmasterol	lungcancer	YXC
ADRB1	Stigmasterol	lungcancer	YXC
ADRB2	beta-sitosterol	lungcancer	YXC
ADRB2	Truflex OBP	lungcancer	YXC
ADRB2	Stigmasterol	lungcancer	YXC
AKR1B1	Stigmasterol	lungcancer	YXC
BAX	beta-sitosterol	lungcancer	YXC
BCL2	beta-sitosterol	lungcancer	YXC
CALM1	7-O-Methyleriodictyol	lungcancer	YXC
CASP3	beta-sitosterol	lungcancer	YXC
CASP8	beta-sitosterol	lungcancer	YXC
CHRM1	Anemonin	lungcancer	YXC
CHRM1	Stigmasterol	lungcancer	YXC
CHRM1	Truflex OBP	lungcancer	YXC
CHRM1	beta-sitosterol	lungcancer	YXC
CHRM3	Stigmasterol	lungcancer	YXC
CHRM3	beta-sitosterol	lungcancer	YXC
CHRM3	Anemonin	lungcancer	YXC
CHRNA2	beta-sitosterol	lungcancer	YXC
DRD1	beta-sitosterol	lungcancer	YXC
GABRA3	beta-sitosterol	lungcancer	YXC
HSP90AB1	7-O-Methyleriodictyol	lungcancer	YXC
HSP90AB1	beta-sitosterol	lungcancer	YXC
JUN	beta-sitosterol	lungcancer	YXC
MAOA	Stigmasterol	lungcancer	YXC
MAOB	Stigmasterol	lungcancer	YXC
MAP2	beta-sitosterol	lungcancer	YXC
NCOA1	Stigmasterol	lungcancer	YXC
NCOA2	CLR	lungcancer	YXC
NCOA2	poriferasterol monoglucoside_qt	lungcancer	YXC
NCOA2	Mandenol	lungcancer	YXC
NCOA2	beta-sitosterol	lungcancer	YXC
NCOA2	Stigmasterol	lungcancer	YXC
NR3C2	vittadinoside_qt	lungcancer	YXC
NR3C2	CLR	lungcancer	YXC
NR3C2	Stigmasterol	lungcancer	YXC
OPRM1	beta-sitosterol	lungcancer	YXC
PGR	CLR	lungcancer	YXC
PGR	beta-sitosterol	lungcancer	YXC
PGR	campesterol	lungcancer	YXC
PGR	Sitosteryl acetate	lungcancer	YXC
PGR	poriferasterol monoglucoside_qt	lungcancer	YXC
PGR	Stigmasterol	lungcancer	YXC
PGR	vittadinoside_qt	lungcancer	YXC
PIK3CG	beta-sitosterol	lungcancer	YXC
PLAU	Stigmasterol	lungcancer	YXC
PON1	beta-sitosterol	lungcancer	YXC
PRKCA	beta-sitosterol	lungcancer	YXC
PTGS1	7-O-Methyleriodictyol	lungcancer	YXC
PTGS1	beta-sitosterol	lungcancer	YXC
PTGS1	Mandenol	lungcancer	YXC
PTGS1	Stigmasterol	lungcancer	YXC
PTGS2	7-O-Methyleriodictyol	lungcancer	YXC
PTGS2	Mandenol	lungcancer	YXC
PTGS2	Stigmasterol	lungcancer	YXC
PTGS2	beta-sitosterol	lungcancer	YXC
RXRA	Stigmasterol	lungcancer	YXC
SCN5A	beta-sitosterol	lungcancer	YXC
SCN5A	Stigmasterol	lungcancer	YXC
SCN5A	Truflex OBP	lungcancer	YXC
SLC6A2	Stigmasterol	lungcancer	YXC
SLC6A2	Truflex OBP	lungcancer	YXC
SLC6A3	Stigmasterol	lungcancer	YXC
SLC6A3	Truflex OBP	lungcancer	YXC
TGFB1	beta-sitosterol	lungcancer	YXC
ABCA1	Adenosine Triphosphate	lungcancer	RS
ABCB1	Adenosine Triphosphate	lungcancer	RS
ABCC2	Adenosine Triphosphate	lungcancer	RS
ABCC8	Adenosine Triphosphate	lungcancer	RS
ABCG1	Adenosine Triphosphate	lungcancer	RS
ABCG4	Adenosine Triphosphate	lungcancer	RS
ABL1	Adenosine Triphosphate	lungcancer	RS
ABL2	Adenosine Triphosphate	lungcancer	RS
ACACA	Biotin	lungcancer	RS
ACE	Aposcopolamine	lungcancer	RS
ACHE	Pyrrole-2-Aldehyde	lungcancer	RS
ACHE	Frutinone A	lungcancer	RS
ACHE	Dibutyl Phthalate	lungcancer	RS
ACHE	Dauricine	lungcancer	RS
ACHE	Choline	lungcancer	RS
ACHE	Citronellal	lungcancer	RS
ACHE	kaempferol	lungcancer	RS
ACO2	Hexadecanoic Acid	lungcancer	RS
ACO2	Pentadecanoic Acid	lungcancer	RS
ACO2	Tridecanoic Acid	lungcancer	RS
ACSL3	Palmitoleic Acid	lungcancer	RS
ACSL3	Malvic Acid	lungcancer	RS
ACSL4	Malvic Acid	lungcancer	RS
ACSL4	Palmitoleic Acid	lungcancer	RS
ACSS2	Adenosine Triphosphate	lungcancer	RS
ACSS2	Adenosine	lungcancer	RS
ACVR1B	Adenosine Triphosphate	lungcancer	RS
ACVRL1	Adenosine Triphosphate	lungcancer	RS
ADA	Adenosine	lungcancer	RS
ADAM8	1-Heptadecanol	lungcancer	RS
ADAM8	1-Tetradecanol	lungcancer	RS
ADCY1	Adenosine Triphosphate	lungcancer	RS
ADCY1	Adenosine	lungcancer	RS
ADCYAP1	ginsenoside rh2	lungcancer	RS
ADH1A	Beta-Humulene	lungcancer	RS
ADH1A	Alpha-Guriunene	lungcancer	RS
ADH1A	Beta-Selinene	lungcancer	RS
ADH1A	Humulene	lungcancer	RS
ADH1A	Alpha-Farnesene	lungcancer	RS
ADH1A	Delta-Guaiene	lungcancer	RS
ADH1A	Beta-Elemene	lungcancer	RS
ADH1A	Delta-Elemene	lungcancer	RS
ADH1A	Trans-Caryophyllene	lungcancer	RS
ADH1A	Bicyclogermacrene	lungcancer	RS
ADH1A	Calarene	lungcancer	RS
ADH1A	Stigmasterol	lungcancer	RS
ADH1A	Beta-Bisabolene	lungcancer	RS
ADH1A	Gamma-Selinene	lungcancer	RS
ADH1A	Tetradecane	lungcancer	RS
ADH1A	Epsilon-Cadinene	lungcancer	RS
ADH1B	Stigmasterol	lungcancer	RS
ADH1B	Beta-Elemene	lungcancer	RS
ADH1B	Trans-Caryophyllene	lungcancer	RS
ADH1B	Delta-Guaiene	lungcancer	RS
ADH1B	Humulene	lungcancer	RS
ADH1B	Tetradecane	lungcancer	RS
ADH1B	Beta-Bisabolene	lungcancer	RS
ADH1B	Beta-Selinene	lungcancer	RS
ADH1B	Delta-Elemene	lungcancer	RS
ADH1B	Gamma-Selinene	lungcancer	RS
ADH1B	Calarene	lungcancer	RS
ADH1B	Alpha-Farnesene	lungcancer	RS
ADH1B	Alpha-Guriunene	lungcancer	RS
ADH1B	Epsilon-Cadinene	lungcancer	RS
ADH1B	Bicyclogermacrene	lungcancer	RS
ADH1B	Beta-Humulene	lungcancer	RS
ADH1C	Calarene	lungcancer	RS
ADH1C	Beta-Selinene	lungcancer	RS
ADH1C	Trans-Caryophyllene	lungcancer	RS
ADH1C	Tetradecane	lungcancer	RS
ADH1C	Beta-Humulene	lungcancer	RS
ADH1C	Pentadecanoic Acid	lungcancer	RS
ADH1C	Delta-Elemene	lungcancer	RS
ADH1C	Hexadecanoic Acid	lungcancer	RS
ADH1C	Tridecanoic Acid	lungcancer	RS
ADH1C	Beta-Bisabolene	lungcancer	RS
ADH1C	Gamma-Selinene	lungcancer	RS
ADH1C	Alpha-Guriunene	lungcancer	RS
ADH1C	Stigmasterol	lungcancer	RS
ADH1C	Humulene	lungcancer	RS
ADH1C	Beta-Elemene	lungcancer	RS
ADH1C	Stigmasterol	lungcancer	RS
ADH1C	Bicyclogermacrene	lungcancer	RS
ADH1C	Epsilon-Cadinene	lungcancer	RS
ADH1C	Alpha-Farnesene	lungcancer	RS
ADH1C	Delta-Guaiene	lungcancer	RS
ADORA2A	Guanosine	lungcancer	RS
ADORA2A	Adenosine	lungcancer	RS
ADORA2A	Adenine	lungcancer	RS
ADORA3	Adenine	lungcancer	RS
ADORA3	Adenosine	lungcancer	RS
ADRA1A	Stigmasterol	lungcancer	RS
ADRA1A	beta-sitosterol	lungcancer	RS
ADRB1	Stigmasterol	lungcancer	RS
ADRB2	beta-sitosterol	lungcancer	RS
ADRB2	Fumarine	lungcancer	RS
ADRB2	Girinimbin	lungcancer	RS
ADRB2	suchilactone	lungcancer	RS
ADRB2	Diop	lungcancer	RS
ADRB2	Inermin	lungcancer	RS
ADRB2	Frutinone A	lungcancer	RS
ADRB2	Stigmasterol	lungcancer	RS
ADRB2	Aposiopolamine	lungcancer	RS
AHR	kaempferol	lungcancer	RS
AHSA1	kaempferol	lungcancer	RS
AIFM1	Riboflavine	lungcancer	RS
AKR1B1	Stigmasterol	lungcancer	RS
AKR1C1	Dianthramine	lungcancer	RS
AKR1C2	Hexadecanoic Acid	lungcancer	RS
AKR1C2	Dianthramine	lungcancer	RS
AKR1C2	Pentadecanoic Acid	lungcancer	RS
AKR1C2	Tridecanoic Acid	lungcancer	RS
AKR1C3	Tridecanoic Acid	lungcancer	RS
AKR1C3	kaempferol	lungcancer	RS
AKR1C3	Pentadecanoic Acid	lungcancer	RS
AKR1C3	Hexadecanoic Acid	lungcancer	RS
AKT1	kaempferol	lungcancer	RS
AKT1	Adenosine Triphosphate	lungcancer	RS
ALDH1A1	Malvic Acid	lungcancer	RS
ALDH1A1	Palmitoleic Acid	lungcancer	RS
ALDH1A1	Beta-Santalol	lungcancer	RS
ALDH1A2	Malvic Acid	lungcancer	RS
ALDH1A2	Beta-Santalol	lungcancer	RS
ALDH1A2	Palmitoleic Acid	lungcancer	RS
ALDH1A3	Beta-Santalol	lungcancer	RS
ALDH2	Beta-Elemene	lungcancer	RS
ALDH2	Alpha-Farnesene	lungcancer	RS
ALDH2	Calarene	lungcancer	RS
ALDH2	Beta-Humulene	lungcancer	RS
ALDH2	Humulene	lungcancer	RS
ALDH2	Epsilon-Cadinene	lungcancer	RS
ALDH2	Gamma-Selinene	lungcancer	RS
ALDH2	Bicyclogermacrene	lungcancer	RS
ALDH2	Beta-Selinene	lungcancer	RS
ALDH2	Alpha-Guriunene	lungcancer	RS
ALDH2	Beta-Bisabolene	lungcancer	RS
ALDH2	Delta-Guaiene	lungcancer	RS
ALDH2	Stigmasterol	lungcancer	RS
ALDH2	Trans-Caryophyllene	lungcancer	RS
ALDH2	Delta-Elemene	lungcancer	RS
ALDH2	Tetradecane	lungcancer	RS
ALDH3A1	Beta-Santalol	lungcancer	RS
ALDH3A1	Palmitoleic Acid	lungcancer	RS
ALDH3A1	Malvic Acid	lungcancer	RS
ALK	Adenosine Triphosphate	lungcancer	RS
ALOX5	Dianthramine	lungcancer	RS
ALOX5	kaempferol	lungcancer	RS
APAF1	Adenosine Triphosphate	lungcancer	RS
APRT	Adenosine Triphosphate	lungcancer	RS
AR	Deoxyharringtonine	lungcancer	RS
AR	Tridecanoic Acid	lungcancer	RS
AR	Pentadecanoic Acid	lungcancer	RS
AR	kaempferol	lungcancer	RS
AR	Frutinone A	lungcancer	RS
AR	Hexadecanoic Acid	lungcancer	RS
AR	16-Oxoseratenediol	lungcancer	RS
ARAF	Adenosine Triphosphate	lungcancer	RS
ASNS	Adenosine Triphosphate	lungcancer	RS
ASPH	Tridecanoic Acid	lungcancer	RS
ASPH	Hexadecanoic Acid	lungcancer	RS
ASPH	Pentadecanoic Acid	lungcancer	RS
ASS1	Adenosine Triphosphate	lungcancer	RS
ATF4	Adenosine Triphosphate	lungcancer	RS
BAX	kaempferol	lungcancer	RS
BAX	ginsenoside rh2	lungcancer	RS
BAX	beta-sitosterol	lungcancer	RS
BCHE	Dibutyl Phthalate	lungcancer	RS
BCHE	Choline	lungcancer	RS
BCHE	Citronellal	lungcancer	RS
BCHE	Pyrrole-2-Aldehyde	lungcancer	RS
BCL2	beta-sitosterol	lungcancer	RS
BCL2	kaempferol	lungcancer	RS
CACNA1D	1-Tetradecanol	lungcancer	RS
CACNA1D	1-Heptadecanol	lungcancer	RS
CALM1	kaempferol	lungcancer	RS
CALM1	suchilactone	lungcancer	RS
CALM1	Fumarine	lungcancer	RS
CALM1	Inermin	lungcancer	RS
CASP1	ginsenoside rh2	lungcancer	RS
CASP3	ginsenoside rh2	lungcancer	RS
CASP3	kaempferol	lungcancer	RS
CASP3	beta-sitosterol	lungcancer	RS
CASP8	beta-sitosterol	lungcancer	RS
CASP9	beta-sitosterol	lungcancer	RS
CASP9	Adenosine Triphosphate	lungcancer	RS
CAT	Bicyclogermacrene	lungcancer	RS
CAT	Beta-Elemene	lungcancer	RS
CAT	Calarene	lungcancer	RS
CAT	Humulene	lungcancer	RS
CAT	Alpha-Guriunene	lungcancer	RS
CAT	Beta-Selinene	lungcancer	RS
CAT	Beta-Humulene	lungcancer	RS
CAT	Tetradecane	lungcancer	RS
CAT	Beta-Bisabolene	lungcancer	RS
CAT	Epsilon-Cadinene	lungcancer	RS
CAT	Gamma-Selinene	lungcancer	RS
CAT	Delta-Guaiene	lungcancer	RS
CAT	Delta-Elemene	lungcancer	RS
CAT	Stigmasterol	lungcancer	RS
CAT	Alpha-Farnesene	lungcancer	RS
CAT	Trans-Caryophyllene	lungcancer	RS
CBS	Vitamin B12	lungcancer	RS
CD34	Putrescine	lungcancer	RS
CEBPA	Vitamin B12	lungcancer	RS
CES1	Pentadecanoic Acid	lungcancer	RS
CES1	Hexadecanoic Acid	lungcancer	RS
CES1	Tridecanoic Acid	lungcancer	RS
CHRM1	beta-sitosterol	lungcancer	RS
CHRM1	Stigmasterol	lungcancer	RS
CHRM1	kaempferol	lungcancer	RS
CHRM1	Aposiopolamine	lungcancer	RS
CHRM1	Fumarine	lungcancer	RS
CHRM1	Aposcopolamine	lungcancer	RS
CHRM1	Aposiopolamine	lungcancer	RS
CHRM3	beta-sitosterol	lungcancer	RS
CHRM3	Fumarine	lungcancer	RS
CHRM3	Diop	lungcancer	RS
CHRM3	Inermin	lungcancer	RS
CHRM3	Aposiopolamine	lungcancer	RS
CHRM3	Aposcopolamine	lungcancer	RS
CHRM3	Stigmasterol	lungcancer	RS
CHRM3	Aposiopolamine	lungcancer	RS
CHRNA2	beta-sitosterol	lungcancer	RS
CHRNA2	Dauricine	lungcancer	RS
CHRNA2	1-Tetradecanol	lungcancer	RS
CHRNA2	1-Heptadecanol	lungcancer	RS
CHRNA3	1-Tetradecanol	lungcancer	RS
CHRNA3	1-Heptadecanol	lungcancer	RS
CHRNA4	1-Heptadecanol	lungcancer	RS
CHRNA4	1-Tetradecanol	lungcancer	RS
CHRNA5	1-Heptadecanol	lungcancer	RS
CHRNA5	1-Tetradecanol	lungcancer	RS
CHRNA6	1-Heptadecanol	lungcancer	RS
CHRNA6	1-Tetradecanol	lungcancer	RS
CHRNA7	Inermin	lungcancer	RS
CHRNA7	1-Heptadecanol	lungcancer	RS
CHRNA7	Frutinone A	lungcancer	RS
CHRNA7	1-Tetradecanol	lungcancer	RS
CHRNA7	Stigmasterol	lungcancer	RS
CHRNA7	beta-sitosterol	lungcancer	RS
CHRNA7	Girinimbin	lungcancer	RS
CHRNA9	1-Tetradecanol	lungcancer	RS
CHRNA9	1-Heptadecanol	lungcancer	RS
CHRNB3	1-Tetradecanol	lungcancer	RS
CHRNB3	1-Heptadecanol	lungcancer	RS
CHRNB4	1-Heptadecanol	lungcancer	RS
CHRNB4	1-Tetradecanol	lungcancer	RS
CHUK	Dianthramine	lungcancer	RS
CKB	Palmitoleic Acid	lungcancer	RS
CKB	Malvic Acid	lungcancer	RS
CNR1	Putrescine	lungcancer	RS
COX1	Hexadecanoic Acid	lungcancer	RS
COX1	Tridecanoic Acid	lungcancer	RS
COX1	Pentadecanoic Acid	lungcancer	RS
COX2	Pentadecanoic Acid	lungcancer	RS
COX2	Hexadecanoic Acid	lungcancer	RS
COX2	Tridecanoic Acid	lungcancer	RS
COX5A	Hexadecanoic Acid	lungcancer	RS
COX5A	Pentadecanoic Acid	lungcancer	RS
COX5A	Tridecanoic Acid	lungcancer	RS
COX8A	Tridecanoic Acid	lungcancer	RS
COX8A	Pentadecanoic Acid	lungcancer	RS
COX8A	Hexadecanoic Acid	lungcancer	RS
CREB1	Adenosine	lungcancer	RS
CREB1	Adenosine Triphosphate	lungcancer	RS
CRTAP	Hexadecanoic Acid	lungcancer	RS
CRTAP	Tridecanoic Acid	lungcancer	RS
CRTAP	Pentadecanoic Acid	lungcancer	RS
CTNNB1	Adenosine Triphosphate	lungcancer	RS
CUBN	Vitamin B12	lungcancer	RS
CX3CR1	Adenosine	lungcancer	RS
CYP1A1	kaempferol	lungcancer	RS
CYP1A2	kaempferol	lungcancer	RS
CYP1B1	kaempferol	lungcancer	RS
CYP27B1	Gamma-Sitosterol	lungcancer	RS
CYP3A4	kaempferol	lungcancer	RS
DCK	Adenosine Triphosphate	lungcancer	RS
DHFR	Elemicin	lungcancer	RS
DLD	Riboflavine	lungcancer	RS
DNMT1	Guanosine	lungcancer	RS
DPP4	Aposiopolamine	lungcancer	RS
DPP4	kaempferol	lungcancer	RS
DPP4	Frutinone A	lungcancer	RS
DPYD	Riboflavine	lungcancer	RS
DRD1	Fumarine	lungcancer	RS
DRD1	beta-sitosterol	lungcancer	RS
DRD2	Putrescine	lungcancer	RS
ENPP1	Uridine	lungcancer	RS
EPHX2	Putrescine	lungcancer	RS
ESR1	Widdrol	lungcancer	RS
ESR1	Alpha-Cadinol	lungcancer	RS
ESR1	Campesterol	lungcancer	RS
ESR1	Gamma-Sitosterol	lungcancer	RS
F10	suchilactone	lungcancer	RS
F10	Fumarine	lungcancer	RS
F2	kaempferol	lungcancer	RS
F2	Frutinone A	lungcancer	RS
FADS1	Palmitoleic Acid	lungcancer	RS
FADS1	Malvic Acid	lungcancer	RS
FADS2	Malvic Acid	lungcancer	RS
FADS2	Palmitoleic Acid	lungcancer	RS
FBP1	Adenosine Triphosphate	lungcancer	RS
FBP1	Adenosine	lungcancer	RS
GABRA3	1-Heptadecanol	lungcancer	RS
GABRA3	Stigmasterol	lungcancer	RS
GABRA3	1-Tetradecanol	lungcancer	RS
GABRA3	beta-sitosterol	lungcancer	RS
GABRB3	1-Heptadecanol	lungcancer	RS
GABRB3	1-Tetradecanol	lungcancer	RS
GABRQ	1-Heptadecanol	lungcancer	RS
GABRQ	1-Tetradecanol	lungcancer	RS
GC	Protopanaxatriol	lungcancer	RS
GC	20(S)-Protopanaxadiol	lungcancer	RS
GC	Gamma-Sitosterol	lungcancer	RS
GC	Protopanaxadiol	lungcancer	RS
GLRA1	1-Heptadecanol	lungcancer	RS
GLRA1	1-Tetradecanol	lungcancer	RS
GPRC5A	Palmitoleic Acid	lungcancer	RS
GPRC5A	Malvic Acid	lungcancer	RS
GRB2	Adenosine Triphosphate	lungcancer	RS
GRIA3	1-Heptadecanol	lungcancer	RS
GRIA3	1-Tetradecanol	lungcancer	RS
GRIN2B	Putrescine	lungcancer	RS
GSR	Riboflavine	lungcancer	RS
GSTM1	kaempferol	lungcancer	RS
GSTM2	kaempferol	lungcancer	RS
GSTP1	kaempferol	lungcancer	RS
HAP1	Adenosine	lungcancer	RS
HDAC2	Hexadecanoic Acid	lungcancer	RS
HDAC2	Tridecanoic Acid	lungcancer	RS
HDAC2	Pentadecanoic Acid	lungcancer	RS
HDAC9	Hexadecanoic Acid	lungcancer	RS
HDAC9	Pentadecanoic Acid	lungcancer	RS
HDAC9	Tridecanoic Acid	lungcancer	RS
HIF1AN	Pentadecanoic Acid	lungcancer	RS
HIF1AN	Tridecanoic Acid	lungcancer	RS
HIF1AN	Hexadecanoic Acid	lungcancer	RS
HINT1	Adenosine	lungcancer	RS
HINT1	Adenosine Triphosphate	lungcancer	RS
HMOX1	kaempferol	lungcancer	RS
HNRNPK	3,5-Dimethyl-4-Methoxybenzoic Acid	lungcancer	RS
HSD17B6	Hexadecanoic Acid	lungcancer	RS
HSD17B6	Pentadecanoic Acid	lungcancer	RS
HSD17B6	Tridecanoic Acid	lungcancer	RS
HSP90AA1	Frutinone A	lungcancer	RS
HSP90AA1	kaempferol	lungcancer	RS
HSP90AA1	Dianthramine	lungcancer	RS
HSP90AA1	Fumarine	lungcancer	RS
HSP90AA1	beta-sitosterol	lungcancer	RS
HSP90AA1	Inermin	lungcancer	RS
HSP90AA1	suchilactone	lungcancer	RS
HTR3A	Inermin	lungcancer	RS
HTR3A	Putrescine	lungcancer	RS
HTR3A	Fumarine	lungcancer	RS
HTR3A	1-Tetradecanol	lungcancer	RS
HTR3A	1-Heptadecanol	lungcancer	RS
HTR3A	Dauricine	lungcancer	RS
ICAM1	kaempferol	lungcancer	RS
IFNG	ginsenoside rh2	lungcancer	RS
IKBKB	kaempferol	lungcancer	RS
IKBKB	Dianthramine	lungcancer	RS
IKBKE	kaempferol	lungcancer	RS
IL13	Malvic Acid	lungcancer	RS
IL13	Palmitoleic Acid	lungcancer	RS
IL13	Dianthramine	lungcancer	RS
IL1B	Malvic Acid	lungcancer	RS
IL1B	Palmitoleic Acid	lungcancer	RS
IL1B	ginsenoside rh2	lungcancer	RS
IL1B	Dianthramine	lungcancer	RS
IL4I1	Riboflavine	lungcancer	RS
IMPDH1	Uridine	lungcancer	RS
INSR	kaempferol	lungcancer	RS
INSRR	kaempferol	lungcancer	RS
JAG1	Adenosine Triphosphate	lungcancer	RS
JMJD6	Hexadecanoic Acid	lungcancer	RS
JMJD6	Pentadecanoic Acid	lungcancer	RS
JMJD6	Tridecanoic Acid	lungcancer	RS
JUN	kaempferol	lungcancer	RS
JUN	beta-sitosterol	lungcancer	RS
KCNA3	Alpha-Guriunene	lungcancer	RS
KCNA3	Alpha-Farnesene	lungcancer	RS
KCNA3	Humulene	lungcancer	RS
KCNA3	Gamma-Selinene	lungcancer	RS
KCNA3	Beta-Selinene	lungcancer	RS
KCNA3	Stigmasterol	lungcancer	RS
KCNA3	Beta-Elemene	lungcancer	RS
KCNA3	Delta-Elemene	lungcancer	RS
KCNA3	Beta-Bisabolene	lungcancer	RS
KCNA3	Calarene	lungcancer	RS
KCNA3	Epsilon-Cadinene	lungcancer	RS
KCNA3	Tetradecane	lungcancer	RS
KCNA3	Beta-Humulene	lungcancer	RS
KCNA3	Bicyclogermacrene	lungcancer	RS
KCNA3	Trans-Caryophyllene	lungcancer	RS
KCNA3	Delta-Guaiene	lungcancer	RS
KCNA5	Beta-Humulene	lungcancer	RS
KCNA5	Beta-Selinene	lungcancer	RS
KCNA5	Calarene	lungcancer	RS
KCNA5	Alpha-Farnesene	lungcancer	RS
KCNA5	Gamma-Selinene	lungcancer	RS
KCNA5	Tetradecane	lungcancer	RS
KCNA5	Epsilon-Cadinene	lungcancer	RS
KCNA5	Trans-Caryophyllene	lungcancer	RS
KCNA5	Beta-Elemene	lungcancer	RS
KCNA5	Humulene	lungcancer	RS
KCNA5	Delta-Guaiene	lungcancer	RS
KCNA5	Bicyclogermacrene	lungcancer	RS
KCNA5	Stigmasterol	lungcancer	RS
KCNA5	Delta-Elemene	lungcancer	RS
KCNA5	Beta-Bisabolene	lungcancer	RS
KCNA5	Alpha-Guriunene	lungcancer	RS
KCNJ3	1-Heptadecanol	lungcancer	RS
KCNJ3	1-Tetradecanol	lungcancer	RS
KCNJ5	1-Tetradecanol	lungcancer	RS
KCNJ5	1-Heptadecanol	lungcancer	RS
KCNJ6	1-Heptadecanol	lungcancer	RS
KCNJ6	1-Tetradecanol	lungcancer	RS
KCNJ9	1-Heptadecanol	lungcancer	RS
KCNJ9	1-Tetradecanol	lungcancer	RS
KCNMA1	suchilactone	lungcancer	RS
KCNMA1	1-Heptadecanol	lungcancer	RS
KCNMA1	1-Tetradecanol	lungcancer	RS
KCNMA1	Elemicin	lungcancer	RS
KCNQ1	Alpha-Guriunene	lungcancer	RS
KCNQ1	Alpha-Farnesene	lungcancer	RS
KCNQ1	Beta-Bisabolene	lungcancer	RS
KCNQ1	Calarene	lungcancer	RS
KCNQ1	Delta-Guaiene	lungcancer	RS
KCNQ1	Trans-Caryophyllene	lungcancer	RS
KCNQ1	Beta-Humulene	lungcancer	RS
KCNQ1	Epsilon-Cadinene	lungcancer	RS
KCNQ1	Beta-Elemene	lungcancer	RS
KCNQ1	Gamma-Selinene	lungcancer	RS
KCNQ1	Bicyclogermacrene	lungcancer	RS
KCNQ1	Beta-Selinene	lungcancer	RS
KCNQ1	Humulene	lungcancer	RS
KCNQ1	Stigmasterol	lungcancer	RS
KCNQ1	Tetradecane	lungcancer	RS
KCNQ1	Delta-Elemene	lungcancer	RS
KDR	Fumarine	lungcancer	RS
LPCAT1	Malvic Acid	lungcancer	RS
LPCAT1	Palmitoleic Acid	lungcancer	RS
MAOA	Stigmasterol	lungcancer	RS
MAOA	Riboflavine	lungcancer	RS
MAOB	Stigmasterol	lungcancer	RS
MAOB	Riboflavine	lungcancer	RS
MAP2	beta-sitosterol	lungcancer	RS
MAP2K4	ginsenoside rh2	lungcancer	RS
MAPK8	kaempferol	lungcancer	RS
MMP1	kaempferol	lungcancer	RS
MPO	Dianthramine	lungcancer	RS
MTHFR	Vitamin B12	lungcancer	RS
MTR	Vitamin B12	lungcancer	RS
MTRR	Vitamin B12	lungcancer	RS
MUT	Vitamin B12	lungcancer	RS
NCOA1	Stigmasterol	lungcancer	RS
NCOA1	suchilactone	lungcancer	RS
NCOA1	Inermin	lungcancer	RS
NCOA2	Stigmasterol	lungcancer	RS
NCOA2	Girinimbin	lungcancer	RS
NCOA2	Ginsenoside-Rh4_qt	lungcancer	RS
NCOA2	beta-sitosterol	lungcancer	RS
NCOA2	arachidonate	lungcancer	RS
NCOA2	kaempferol	lungcancer	RS
NFKBIA	ginsenoside rh2	lungcancer	RS
NOS1	Riboflavine	lungcancer	RS
NOS2	kaempferol	lungcancer	RS
NOS3	kaempferol	lungcancer	RS
NOTCH2	16-Oxoseratenediol	lungcancer	RS
NQO1	Riboflavine	lungcancer	RS
NR0B1	Malvic Acid	lungcancer	RS
NR0B1	Palmitoleic Acid	lungcancer	RS
NR1I2	kaempferol	lungcancer	RS
NR1I3	kaempferol	lungcancer	RS
NR3C1	Panaxadiol	lungcancer	RS
NR3C1	16-Oxoseratenediol	lungcancer	RS
NR3C2	Stigmasterol	lungcancer	RS
NR3C2	Deoxyharringtonine	lungcancer	RS
NR3C2	Ginsenoside-Rh4_qt	lungcancer	RS
NT5C2	Adenosine Triphosphate	lungcancer	RS
NT5C2	Uridine	lungcancer	RS
ODC1	Spermine	lungcancer	RS
ODC1	Spermidine	lungcancer	RS
OGDH	Tridecanoic Acid	lungcancer	RS
OGDH	Pentadecanoic Acid	lungcancer	RS
OGDH	Hexadecanoic Acid	lungcancer	RS
OPRK1	Panasinsanol A	lungcancer	RS
OPRK1	1-Heptadecanol	lungcancer	RS
OPRK1	1-Tetradecanol	lungcancer	RS
OPRK1	Ginsenol	lungcancer	RS
OPRK1	Panasinsanol B	lungcancer	RS
OPRK1	Patchouli Alcohol	lungcancer	RS
OPRM1	beta-sitosterol	lungcancer	RS
OPRM1	Fumarine	lungcancer	RS
P4HA2	Hexadecanoic Acid	lungcancer	RS
P4HA2	Tridecanoic Acid	lungcancer	RS
P4HA2	Pentadecanoic Acid	lungcancer	RS
P4HB	Hexadecanoic Acid	lungcancer	RS
P4HB	Pentadecanoic Acid	lungcancer	RS
P4HB	Tridecanoic Acid	lungcancer	RS
PAOX	Spermine	lungcancer	RS
PAOX	Spermidine	lungcancer	RS
PC	Biotin	lungcancer	RS
PCYT1A	Choline	lungcancer	RS
PDE2A	Elemicin	lungcancer	RS
PDE4A	Elemicin	lungcancer	RS
PDE4D	Adenosine Triphosphate	lungcancer	RS
PDE4D	Adenosine	lungcancer	RS
PGR	Campesterol	lungcancer	RS
PGR	alexandrin_qt	lungcancer	RS
PGR	beta-sitosterol	lungcancer	RS
PGR	Gamma-Sitosterol	lungcancer	RS
PGR	kaempferol	lungcancer	RS
PGR	Stigmasterol	lungcancer	RS
PGR	Widdrol	lungcancer	RS
PGR	Alpha-Cadinol	lungcancer	RS
PIK3CG	Inermin	lungcancer	RS
PIK3CG	kaempferol	lungcancer	RS
PIK3CG	Girinimbin	lungcancer	RS
PIK3CG	Frutinone A	lungcancer	RS
PIK3CG	beta-sitosterol	lungcancer	RS
PIM1	Adenosine Triphosphate	lungcancer	RS
PIM1	Adenosine	lungcancer	RS
PLA2G1B	Pentadecanoic Acid	lungcancer	RS
PLA2G1B	Hexadecanoic Acid	lungcancer	RS
PLAU	Stigmasterol	lungcancer	RS
PLD2	Choline	lungcancer	RS
PNP	Adenosine	lungcancer	RS
POLB	Guanosine	lungcancer	RS
POLE	Adenosine	lungcancer	RS
POLE4	Adenosine	lungcancer	RS
PON1	beta-sitosterol	lungcancer	RS
POR	Riboflavine	lungcancer	RS
PPARA	3,5-Dimethyl-4-Methoxybenzoic Acid	lungcancer	RS
PPARD	Palmitoleic Acid	lungcancer	RS
PPARD	Malvic Acid	lungcancer	RS
PPARG	kaempferol	lungcancer	RS
PPARG	Frutinone A	lungcancer	RS
PPARG	Dianthramine	lungcancer	RS
PPARG	kaempferol	lungcancer	RS
PPARG	Palmitoleic Acid	lungcancer	RS
PPARG	Malvic Acid	lungcancer	RS
PPP3CA	kaempferol	lungcancer	RS
PRKAA1	Adenosine	lungcancer	RS
PRKAA1	Adenosine Triphosphate	lungcancer	RS
PRKAA2	Adenosine Triphosphate	lungcancer	RS
PRKAB1	Alpha-Farnesene	lungcancer	RS
PRKAB1	Beta-Humulene	lungcancer	RS
PRKAB1	Beta-Elemene	lungcancer	RS
PRKAB1	Adenosine Triphosphate	lungcancer	RS
PRKAB1	Alpha-Guriunene	lungcancer	RS
PRKAB1	Delta-Elemene	lungcancer	RS
PRKAB1	Trans-Caryophyllene	lungcancer	RS
PRKAB1	Beta-Bisabolene	lungcancer	RS
PRKAB1	Humulene	lungcancer	RS
PRKAB1	Beta-Selinene	lungcancer	RS
PRKAB1	Delta-Guaiene	lungcancer	RS
PRKAB1	Calarene	lungcancer	RS
PRKAB1	Stigmasterol	lungcancer	RS
PRKAB1	Gamma-Selinene	lungcancer	RS
PRKAB1	Adenosine	lungcancer	RS
PRKAB1	Tetradecane	lungcancer	RS
PRKAB1	Bicyclogermacrene	lungcancer	RS
PRKAB1	Epsilon-Cadinene	lungcancer	RS
PRKACA	Frutinone A	lungcancer	RS
PRKACA	beta-sitosterol	lungcancer	RS
PRKACA	Girinimbin	lungcancer	RS
PRKACA	Fumarine	lungcancer	RS
PRKACA	Stigmasterol	lungcancer	RS
PRKACA	Inermin	lungcancer	RS
PRKACA	suchilactone	lungcancer	RS
PRKACA	kaempferol	lungcancer	RS
PRKCA	beta-sitosterol	lungcancer	RS
PRKCA	20-Hexadecanoylingenol	lungcancer	RS
PRKCD	20-Hexadecanoylingenol	lungcancer	RS
PTGS1	Girinimbin	lungcancer	RS
PTGS1	suchilactone	lungcancer	RS
PTGS1	Palmitoleic Acid	lungcancer	RS
PTGS1	Fumarine	lungcancer	RS
PTGS1	3,5-Dimethyl-4-Methoxybenzoic Acid	lungcancer	RS
PTGS1	Frutinone A	lungcancer	RS
PTGS1	Dianthramine	lungcancer	RS
PTGS1	kaempferol	lungcancer	RS
PTGS1	Dianthramine	lungcancer	RS
PTGS1	arachidonate	lungcancer	RS
PTGS1	beta-sitosterol	lungcancer	RS
PTGS1	Stigmasterol	lungcancer	RS
PTGS1	Inermin	lungcancer	RS
PTGS1	Malvic Acid	lungcancer	RS
PTGS2	arachidonate	lungcancer	RS
PTGS2	Dianthramine	lungcancer	RS
PTGS2	Inermin	lungcancer	RS
PTGS2	3,5-Dimethyl-4-Methoxybenzoic Acid	lungcancer	RS
PTGS2	suchilactone	lungcancer	RS
PTGS2	ginsenoside rh2	lungcancer	RS
PTGS2	Girinimbin	lungcancer	RS
PTGS2	Fumarine	lungcancer	RS
PTGS2	kaempferol	lungcancer	RS
PTGS2	Frutinone A	lungcancer	RS
PTGS2	Palmitoleic Acid	lungcancer	RS
PTGS2	Stigmasterol	lungcancer	RS
PTGS2	Dianthramine	lungcancer	RS
PTGS2	beta-sitosterol	lungcancer	RS
PTGS2	Malvic Acid	lungcancer	RS
RALA	Adenosine Triphosphate	lungcancer	RS
RARA	3,5-Dimethyl-4-Methoxybenzoic Acid	lungcancer	RS
RARA	Malvic Acid	lungcancer	RS
RARA	Palmitoleic Acid	lungcancer	RS
RARB	3,5-Dimethyl-4-Methoxybenzoic Acid	lungcancer	RS
RARB	Malvic Acid	lungcancer	RS
RARB	Palmitoleic Acid	lungcancer	RS
RARG	Malvic Acid	lungcancer	RS
RARG	3,5-Dimethyl-4-Methoxybenzoic Acid	lungcancer	RS
RARG	Palmitoleic Acid	lungcancer	RS
RBP1	Beta-Santalol	lungcancer	RS
RDH12	Beta-Santalol	lungcancer	RS
RELA	kaempferol	lungcancer	RS
RHO	Beta-Santalol	lungcancer	RS
RIPK1	Adenosine	lungcancer	RS
RRM1	Adenosine	lungcancer	RS
RRM1	Adenosine Triphosphate	lungcancer	RS
RRM2	Adenosine	lungcancer	RS
RRM2B	Adenosine	lungcancer	RS
RS1	Beta-Santalol	lungcancer	RS
RXRA	Inermin	lungcancer	RS
RXRA	Girinimbin	lungcancer	RS
RXRA	Stigmasterol	lungcancer	RS
RXRA	Malvic Acid	lungcancer	RS
RXRA	3,5-Dimethyl-4-Methoxybenzoic Acid	lungcancer	RS
RXRA	suchilactone	lungcancer	RS
RXRA	Frutinone A	lungcancer	RS
RXRA	Palmitoleic Acid	lungcancer	RS
RXRB	Palmitoleic Acid	lungcancer	RS
RXRB	3,5-Dimethyl-4-Methoxybenzoic Acid	lungcancer	RS
RXRB	Malvic Acid	lungcancer	RS
RXRG	Palmitoleic Acid	lungcancer	RS
RXRG	3,5-Dimethyl-4-Methoxybenzoic Acid	lungcancer	RS
RXRG	arachidonate	lungcancer	RS
RXRG	Malvic Acid	lungcancer	RS
SAXO1	Adenosine Triphosphate	lungcancer	RS
SCN5A	Pandamine	lungcancer	RS
SCN5A	Fumarine	lungcancer	RS
SCN5A	Stigmasterol	lungcancer	RS
SCN5A	Tridecanoic Acid	lungcancer	RS
SCN5A	Girinimbin	lungcancer	RS
SCN5A	Inermin	lungcancer	RS
SCN5A	Hexadecanoic Acid	lungcancer	RS
SCN5A	beta-sitosterol	lungcancer	RS
SCN5A	Diop	lungcancer	RS
SCN5A	Pentadecanoic Acid	lungcancer	RS
SCN5A	Frutinone A	lungcancer	RS
SCN5A	suchilactone	lungcancer	RS
SCN7A	Hexadecanoic Acid	lungcancer	RS
SCN7A	Pentadecanoic Acid	lungcancer	RS
SCN7A	Tridecanoic Acid	lungcancer	RS
SCN9A	Pentadecanoic Acid	lungcancer	RS
SCN9A	Hexadecanoic Acid	lungcancer	RS
SCN9A	Tridecanoic Acid	lungcancer	RS
SCN9A	Pandamine	lungcancer	RS
SDHA	Tridecanoic Acid	lungcancer	RS
SDHA	Hexadecanoic Acid	lungcancer	RS
SDHA	Pentadecanoic Acid	lungcancer	RS
SDHAF2	Hexadecanoic Acid	lungcancer	RS
SDHAF2	Tridecanoic Acid	lungcancer	RS
SDHAF2	Pentadecanoic Acid	lungcancer	RS
SDHB	Pentadecanoic Acid	lungcancer	RS
SDHB	Hexadecanoic Acid	lungcancer	RS
SDHB	Tridecanoic Acid	lungcancer	RS
SDHC	Tridecanoic Acid	lungcancer	RS
SDHC	Hexadecanoic Acid	lungcancer	RS
SDHC	Pentadecanoic Acid	lungcancer	RS
SELE	kaempferol	lungcancer	RS
SERPINE1	Dianthramine	lungcancer	RS
SHMT1	Elemicin	lungcancer	RS
SLC25A4	Adenosine Triphosphate	lungcancer	RS
SLC25A5	Adenosine Triphosphate	lungcancer	RS
SLC29A1	1-Tetradecanol	lungcancer	RS
SLC29A1	1-Heptadecanol	lungcancer	RS
SLC6A2	Aposiopolamine	lungcancer	RS
SLC6A2	Stigmasterol	lungcancer	RS
SLC6A2	kaempferol	lungcancer	RS
SLC6A3	Aposiopolamine	lungcancer	RS
SLC6A3	Stigmasterol	lungcancer	RS
SLC6A3	Fumarine	lungcancer	RS
SLC6A8	Palmitoleic Acid	lungcancer	RS
SLC6A8	Malvic Acid	lungcancer	RS
SLC9A1	Palmitoleic Acid	lungcancer	RS
SLC9A1	Malvic Acid	lungcancer	RS
SLIT2	Tridecanoic Acid	lungcancer	RS
SLIT2	Pentadecanoic Acid	lungcancer	RS
SLIT2	Hexadecanoic Acid	lungcancer	RS
SMAD3	Adenosine Triphosphate	lungcancer	RS
SMS	Spermine	lungcancer	RS
SMS	Spermidine	lungcancer	RS
SRD5A2	Pentadecanoic Acid	lungcancer	RS
SRD5A2	Tridecanoic Acid	lungcancer	RS
SRD5A2	Hexadecanoic Acid	lungcancer	RS
STAT1	kaempferol	lungcancer	RS
SUCLG2	Tridecanoic Acid	lungcancer	RS
SUCLG2	Hexadecanoic Acid	lungcancer	RS
SUCLG2	Pentadecanoic Acid	lungcancer	RS
TCN1	Vitamin B12	lungcancer	RS
TGFB1	beta-sitosterol	lungcancer	RS
TGFBR2	Adenosine Triphosphate	lungcancer	RS
TNF	kaempferol	lungcancer	RS
TNF	Malvic Acid	lungcancer	RS
TNF	Palmitoleic Acid	lungcancer	RS
TNF	ginsenoside rh2	lungcancer	RS
TNF	3,5-Dimethyl-4-Methoxybenzoic Acid	lungcancer	RS
TNK2	Adenosine Triphosphate	lungcancer	RS
TOP1	Mannose	lungcancer	RS
TOP2A	kaempferol	lungcancer	RS
TOP2A	Fumarine	lungcancer	RS
TP53	3,5-Dimethyl-4-Methoxybenzoic Acid	lungcancer	RS
TPO	Beta-Humulene	lungcancer	RS
TPO	Calarene	lungcancer	RS
TPO	Alpha-Guriunene	lungcancer	RS
TPO	Tetradecane	lungcancer	RS
TPO	Delta-Elemene	lungcancer	RS
TPO	Delta-Guaiene	lungcancer	RS
TPO	Gamma-Selinene	lungcancer	RS
TPO	Beta-Elemene	lungcancer	RS
TPO	Trans-Caryophyllene	lungcancer	RS
TPO	Alpha-Farnesene	lungcancer	RS
TPO	Epsilon-Cadinene	lungcancer	RS
TPO	Humulene	lungcancer	RS
TPO	Beta-Selinene	lungcancer	RS
TPO	Stigmasterol	lungcancer	RS
TPO	Beta-Bisabolene	lungcancer	RS
TPO	Bicyclogermacrene	lungcancer	RS
TRPA1	Panasinsanol B	lungcancer	RS
TRPA1	Panasinsanol A	lungcancer	RS
TRPA1	Patchouli Alcohol	lungcancer	RS
TRPA1	Ginsenol	lungcancer	RS
TRPA1	1-Heptadecanol	lungcancer	RS
TRPA1	1-Tetradecanol	lungcancer	RS
TRPM8	Panasinsanol A	lungcancer	RS
TRPM8	Patchouli Alcohol	lungcancer	RS
TRPM8	Panasinsanol B	lungcancer	RS
TRPM8	Ginsenol	lungcancer	RS
TRPM8	1-Tetradecanol	lungcancer	RS
TRPM8	1-Heptadecanol	lungcancer	RS
TRPV1	Palmitoleic Acid	lungcancer	RS
TRPV1	Malvic Acid	lungcancer	RS
TXNRD1	Riboflavine	lungcancer	RS
TYMS	Uridine	lungcancer	RS
TYMS	Elemicin	lungcancer	RS
TYR	Pentadecanoic Acid	lungcancer	RS
TYR	Hexadecanoic Acid	lungcancer	RS
TYR	Tridecanoic Acid	lungcancer	RS
TYRP1	Tridecanoic Acid	lungcancer	RS
TYRP1	Pentadecanoic Acid	lungcancer	RS
TYRP1	Hexadecanoic Acid	lungcancer	RS
UGCG	Adenosine Triphosphate	lungcancer	RS
VCAM1	1-Heptadecanol	lungcancer	RS
VCAM1	kaempferol	lungcancer	RS
VCAM1	1-Tetradecanol	lungcancer	RS
VDR	Protopanaxatriol	lungcancer	RS
VDR	20(S)-Protopanaxadiol	lungcancer	RS
VDR	Gamma-Sitosterol	lungcancer	RS
VDR	Protopanaxadiol	lungcancer	RS
WDHD1	Vitamin B12	lungcancer	RS
WNT4	Widdrol	lungcancer	RS
WNT4	Alpha-Cadinol	lungcancer	RS
XBP1	Adenosine Triphosphate	lungcancer	RS
XDH	kaempferol	lungcancer	RS
XDH	Riboflavine	lungcancer	RS
ABCC2	diosgenin	lungcancer	TD
ABCG2	quercetin	lungcancer	TD
ACACA	quercetin	lungcancer	TD
ACHE	7-Methoxy-2-methyl isoflavone	lungcancer	TD
ACHE	quercetin	lungcancer	TD
ACY1	Asparamide	lungcancer	TD
ACY1	Asparagine	lungcancer	TD
ADH1C	Stigmasterol	lungcancer	TD
ADRA1A	Stigmasterol	lungcancer	TD
ADRA1A	beta-sitosterol	lungcancer	TD
ADRB1	Stigmasterol	lungcancer	TD
ADRB1	7-Methoxy-2-methyl isoflavone	lungcancer	TD
ADRB2	Stigmasterol	lungcancer	TD
ADRB2	quercetin	lungcancer	TD
ADRB2	beta-sitosterol	lungcancer	TD
ADRB2	7-Methoxy-2-methyl isoflavone	lungcancer	TD
ADSSL1	Asparamide	lungcancer	TD
ADSSL1	Asparagine	lungcancer	TD
AGXT	Asparamide	lungcancer	TD
AGXT	Asparagine	lungcancer	TD
AHR	quercetin	lungcancer	TD
AHSA1	quercetin	lungcancer	TD
AKR1B1	Stigmasterol	lungcancer	TD
AKR1B1	quercetin	lungcancer	TD
AKT1	quercetin	lungcancer	TD
AKT1	diosgenin	lungcancer	TD
ALOX5	quercetin	lungcancer	TD
AR	quercetin	lungcancer	TD
AR	7-Methoxy-2-methyl isoflavone	lungcancer	TD
ARG1	Asparagine	lungcancer	TD
ARG1	Asparamide	lungcancer	TD
ARG2	Asparagine	lungcancer	TD
ARG2	Asparamide	lungcancer	TD
ASNS	Asparagine	lungcancer	TD
ASNS	Asparamide	lungcancer	TD
ASPH	Asparamide	lungcancer	TD
ASPH	Asparagine	lungcancer	TD
ASS1	Asparamide	lungcancer	TD
ASS1	Asparagine	lungcancer	TD
AZIN2	Asparagine	lungcancer	TD
AZIN2	Asparamide	lungcancer	TD
BAX	quercetin	lungcancer	TD
BAX	beta-sitosterol	lungcancer	TD
BCL2	beta-sitosterol	lungcancer	TD
BCL2	quercetin	lungcancer	TD
BCL2L1	quercetin	lungcancer	TD
BIRC5	quercetin	lungcancer	TD
CAD	Asparamide	lungcancer	TD
CAD	Asparagine	lungcancer	TD
CALM1	7-Methoxy-2-methyl isoflavone	lungcancer	TD
CASP3	beta-sitosterol	lungcancer	TD
CASP3	quercetin	lungcancer	TD
CASP8	beta-sitosterol	lungcancer	TD
CASP8	quercetin	lungcancer	TD
CASP9	beta-sitosterol	lungcancer	TD
CASP9	quercetin	lungcancer	TD
CAT	diosgenin	lungcancer	TD
CAV1	quercetin	lungcancer	TD
CCL2	quercetin	lungcancer	TD
CCNA2	7-Methoxy-2-methyl isoflavone	lungcancer	TD
CCNB1	quercetin	lungcancer	TD
CCND1	quercetin	lungcancer	TD
CD40LG	quercetin	lungcancer	TD
CDK2	7-Methoxy-2-methyl isoflavone	lungcancer	TD
CDKN1A	quercetin	lungcancer	TD
CDKN1A	diosgenin	lungcancer	TD
CHEK1	7-Methoxy-2-methyl isoflavone	lungcancer	TD
CHEK2	quercetin	lungcancer	TD
CHRM1	beta-sitosterol	lungcancer	TD
CHRM1	7-Methoxy-2-methyl isoflavone	lungcancer	TD
CHRM1	Stigmasterol	lungcancer	TD
CHRM3	beta-sitosterol	lungcancer	TD
CHRM3	Stigmasterol	lungcancer	TD
CHRM3	7-Methoxy-2-methyl isoflavone	lungcancer	TD
CHRNA2	beta-sitosterol	lungcancer	TD
CHRNA7	Stigmasterol	lungcancer	TD
CHRNA7	7-Methoxy-2-methyl isoflavone	lungcancer	TD
CHRNA7	beta-sitosterol	lungcancer	TD
CHUK	quercetin	lungcancer	TD
CIT	quercetin	lungcancer	TD
CLDN4	quercetin	lungcancer	TD
COL1A1	quercetin	lungcancer	TD
COL3A1	quercetin	lungcancer	TD
CPS1	Asparagine	lungcancer	TD
CPS1	Asparamide	lungcancer	TD
CRP	quercetin	lungcancer	TD
CTSD	quercetin	lungcancer	TD
CXCL10	quercetin	lungcancer	TD
CXCL11	quercetin	lungcancer	TD
CXCL8	quercetin	lungcancer	TD
CYP1A1	quercetin	lungcancer	TD
CYP1A2	quercetin	lungcancer	TD
CYP1B1	quercetin	lungcancer	TD
CYP3A4	quercetin	lungcancer	TD
DPP4	quercetin	lungcancer	TD
DPP4	7-Methoxy-2-methyl isoflavone	lungcancer	TD
DRD1	beta-sitosterol	lungcancer	TD
DRD1	7-Methoxy-2-methyl isoflavone	lungcancer	TD
DUOX2	quercetin	lungcancer	TD
E2F1	quercetin	lungcancer	TD
E2F2	quercetin	lungcancer	TD
EGF	quercetin	lungcancer	TD
EGFR	quercetin	lungcancer	TD
EIF2AK1	quercetin	lungcancer	TD
EIF6	quercetin	lungcancer	TD
ELK1	quercetin	lungcancer	TD
ERBB2	quercetin	lungcancer	TD
ERBB3	quercetin	lungcancer	TD
ESR1	7-Methoxy-2-methyl isoflavone	lungcancer	TD
ESR2	7-Methoxy-2-methyl isoflavone	lungcancer	TD
F10	quercetin	lungcancer	TD
F3	quercetin	lungcancer	TD
FASN	diosgenin	lungcancer	TD
FOS	quercetin	lungcancer	TD
GABRA3	beta-sitosterol	lungcancer	TD
GCSH	Asparagine	lungcancer	TD
GCSH	Asparamide	lungcancer	TD
GJA1	quercetin	lungcancer	TD
GLDC	Asparagine	lungcancer	TD
GLDC	Asparamide	lungcancer	TD
GLRA1	Asparamide	lungcancer	TD
GLRA1	Asparagine	lungcancer	TD
GLUL	Asparagine	lungcancer	TD
GLUL	Asparamide	lungcancer	TD
GLYAT	Asparagine	lungcancer	TD
GLYAT	Asparamide	lungcancer	TD
GPT	Asparagine	lungcancer	TD
GPT	Asparamide	lungcancer	TD
GSK3B	7-Methoxy-2-methyl isoflavone	lungcancer	TD
GSS	Asparagine	lungcancer	TD
GSS	Asparamide	lungcancer	TD
GSTM1	quercetin	lungcancer	TD
GSTM2	quercetin	lungcancer	TD
GSTP1	quercetin	lungcancer	TD
HIF1A	quercetin	lungcancer	TD
HIF1A	diosgenin	lungcancer	TD
HIF1AN	Asparamide	lungcancer	TD
HIF1AN	Asparagine	lungcancer	TD
HK2	quercetin	lungcancer	TD
HMOX1	quercetin	lungcancer	TD
HSF1	quercetin	lungcancer	TD
HSP90AB1	quercetin	lungcancer	TD
HSP90AB1	beta-sitosterol	lungcancer	TD
HSP90AB1	7-Methoxy-2-methyl isoflavone	lungcancer	TD
HSPA5	quercetin	lungcancer	TD
HSPB1	quercetin	lungcancer	TD
ICAM1	quercetin	lungcancer	TD
IFNG	quercetin	lungcancer	TD
IGF2	quercetin	lungcancer	TD
IGFBP3	quercetin	lungcancer	TD
IL10	quercetin	lungcancer	TD
IL1A	quercetin	lungcancer	TD
IL1B	quercetin	lungcancer	TD
IL2	quercetin	lungcancer	TD
IL6	quercetin	lungcancer	TD
INSR	quercetin	lungcancer	TD
INSRR	quercetin	lungcancer	TD
IRF1	quercetin	lungcancer	TD
JUN	quercetin	lungcancer	TD
JUN	beta-sitosterol	lungcancer	TD
LARS	Asparagine	lungcancer	TD
LARS	Asparamide	lungcancer	TD
LGSN	Asparamide	lungcancer	TD
LGSN	Asparagine	lungcancer	TD
MAOA	Stigmasterol	lungcancer	TD
MAOB	Stigmasterol	lungcancer	TD
MAOB	7-Methoxy-2-methyl isoflavone	lungcancer	TD
MAOB	quercetin	lungcancer	TD
MAP2	beta-sitosterol	lungcancer	TD
MAPK1	quercetin	lungcancer	TD
MAPK14	7-Methoxy-2-methyl isoflavone	lungcancer	TD
MGAM	quercetin	lungcancer	TD
MMP1	quercetin	lungcancer	TD
MMP2	quercetin	lungcancer	TD
MMP3	quercetin	lungcancer	TD
MMP9	quercetin	lungcancer	TD
MPO	quercetin	lungcancer	TD
MTOR	diosgenin	lungcancer	TD
MYC	quercetin	lungcancer	TD
NCF1	quercetin	lungcancer	TD
NCOA1	7-Methoxy-2-methyl isoflavone	lungcancer	TD
NCOA1	Stigmasterol	lungcancer	TD
NCOA2	sitosterol	lungcancer	TD
NCOA2	Stigmasterol	lungcancer	TD
NCOA2	quercetin	lungcancer	TD
NCOA2	beta-sitosterol	lungcancer	TD
NCOA2	7-Methoxy-2-methyl isoflavone	lungcancer	TD
NFE2L2	quercetin	lungcancer	TD
NFKBIA	quercetin	lungcancer	TD
NFS1	Asparagine	lungcancer	TD
NFS1	Asparamide	lungcancer	TD
NOS2	7-Methoxy-2-methyl isoflavone	lungcancer	TD
NOS3	7-Methoxy-2-methyl isoflavone	lungcancer	TD
NOS3	quercetin	lungcancer	TD
NOS3	quercetin	lungcancer	TD
NQO1	quercetin	lungcancer	TD
NR1I2	diosgenin	lungcancer	TD
NR1I2	quercetin	lungcancer	TD
NR1I3	quercetin	lungcancer	TD
NR3C1	pseudoprotodioscin_qt	lungcancer	TD
NR3C2	sitosterol	lungcancer	TD
NR3C2	diosgenin	lungcancer	TD
NR3C2	pseudoprotodioscin_qt	lungcancer	TD
NR3C2	Stigmasterol	lungcancer	TD
OAZ1	Asparamide	lungcancer	TD
OAZ1	Asparagine	lungcancer	TD
ODC1	quercetin	lungcancer	TD
OPRM1	7-Methoxy-2-methyl isoflavone	lungcancer	TD
OPRM1	beta-sitosterol	lungcancer	TD
PARP1	quercetin	lungcancer	TD
PGR	Stigmasterol	lungcancer	TD
PGR	diosgenin	lungcancer	TD
PGR	sitosterol	lungcancer	TD
PGR	beta-sitosterol	lungcancer	TD
PGR	pseudoprotodioscin_qt	lungcancer	TD
PIK3CG	quercetin	lungcancer	TD
PIK3CG	beta-sitosterol	lungcancer	TD
PIM1	7-Methoxy-2-methyl isoflavone	lungcancer	TD
PLA2G4A	diosgenin	lungcancer	TD
PLAT	quercetin	lungcancer	TD
PLAU	quercetin	lungcancer	TD
PLAU	Stigmasterol	lungcancer	TD
PON1	quercetin	lungcancer	TD
PON1	beta-sitosterol	lungcancer	TD
PPARA	quercetin	lungcancer	TD
PPARD	quercetin	lungcancer	TD
PPARG	7-Methoxy-2-methyl isoflavone	lungcancer	TD
PPARG	quercetin	lungcancer	TD
PPARG	quercetin	lungcancer	TD
PRKCA	quercetin	lungcancer	TD
PRKCA	beta-sitosterol	lungcancer	TD
PRKCB	quercetin	lungcancer	TD
PTEN	quercetin	lungcancer	TD
PTGER3	quercetin	lungcancer	TD
PTGS1	Stigmasterol	lungcancer	TD
PTGS1	beta-sitosterol	lungcancer	TD
PTGS1	7-Methoxy-2-methyl isoflavone	lungcancer	TD
PTGS1	quercetin	lungcancer	TD
PTGS2	Stigmasterol	lungcancer	TD
PTGS2	diosgenin	lungcancer	TD
PTGS2	7-Methoxy-2-methyl isoflavone	lungcancer	TD
PTGS2	beta-sitosterol	lungcancer	TD
PTGS2	quercetin	lungcancer	TD
RAF1	quercetin	lungcancer	TD
RASA1	quercetin	lungcancer	TD
RASSF1	quercetin	lungcancer	TD
RB1	quercetin	lungcancer	TD
RELA	quercetin	lungcancer	TD
RELA	diosgenin	lungcancer	TD
RUNX1T1	quercetin	lungcancer	TD
RUNX2	quercetin	lungcancer	TD
RXRA	7-Methoxy-2-methyl isoflavone	lungcancer	TD
RXRA	quercetin	lungcancer	TD
RXRA	Stigmasterol	lungcancer	TD
SCN5A	quercetin	lungcancer	TD
SCN5A	beta-sitosterol	lungcancer	TD
SCN5A	Stigmasterol	lungcancer	TD
SCN5A	7-Methoxy-2-methyl isoflavone	lungcancer	TD
SELE	quercetin	lungcancer	TD
SERPINE1	quercetin	lungcancer	TD
SHMT1	Asparagine	lungcancer	TD
SHMT1	Asparamide	lungcancer	TD
SHMT2	Asparamide	lungcancer	TD
SHMT2	Asparagine	lungcancer	TD
SLC1A5	Asparagine	lungcancer	TD
SLC1A5	Asparamide	lungcancer	TD
SLC6A2	Stigmasterol	lungcancer	TD
SLC6A3	Stigmasterol	lungcancer	TD
SLC6A3	7-Methoxy-2-methyl isoflavone	lungcancer	TD
SLC7A1	Asparagine	lungcancer	TD
SLC7A1	Asparamide	lungcancer	TD
SLC7A4	Asparagine	lungcancer	TD
SLC7A4	Asparamide	lungcancer	TD
SOD1	diosgenin	lungcancer	TD
SOD1	quercetin	lungcancer	TD
STAT1	quercetin	lungcancer	TD
SULT1E1	quercetin	lungcancer	TD
TFAP2B	Asparamide	lungcancer	TD
TFAP2B	Asparagine	lungcancer	TD
TGFB1	beta-sitosterol	lungcancer	TD
TGFB1	quercetin	lungcancer	TD
THBD	quercetin	lungcancer	TD
TLR4	Asparamide	lungcancer	TD
TLR4	Asparagine	lungcancer	TD
TNF	quercetin	lungcancer	TD
TNNC1	Asparamide	lungcancer	TD
TNNC1	Asparagine	lungcancer	TD
TOP1	quercetin	lungcancer	TD
TOP2A	quercetin	lungcancer	TD
TP53	diosgenin	lungcancer	TD
TP53	quercetin	lungcancer	TD
TYMS	Asparagine	lungcancer	TD
TYMS	Asparamide	lungcancer	TD
VARS2	Asparagine	lungcancer	TD
VARS2	Asparamide	lungcancer	TD
VCAM1	quercetin	lungcancer	TD
VDAC1	Asparamide	lungcancer	TD
VDAC1	Asparagine	lungcancer	TD
VDAC2	Asparagine	lungcancer	TD
VDAC2	Asparamide	lungcancer	TD
VEGFA	quercetin	lungcancer	TD
VEGFA	diosgenin	lungcancer	TD
XDH	quercetin	lungcancer	TD
ABCG2	quercetin	lungcancer	TLZ
ACACA	quercetin	lungcancer	TLZ
ACHE	quercetin	lungcancer	TLZ
ACHE	kaempferol	lungcancer	TLZ
ACHE	isorhamnetin	lungcancer	TLZ
ADH1B	hederagenin	lungcancer	TLZ
ADH1C	hederagenin	lungcancer	TLZ
ADRA1A	beta-sitosterol	lungcancer	TLZ
ADRB2	beta-sitosterol	lungcancer	TLZ
ADRB2	quercetin	lungcancer	TLZ
AHR	kaempferol	lungcancer	TLZ
AHR	quercetin	lungcancer	TLZ
AHSA1	quercetin	lungcancer	TLZ
AHSA1	kaempferol	lungcancer	TLZ
AKR1B1	isorhamnetin	lungcancer	TLZ
AKR1B1	quercetin	lungcancer	TLZ
AKR1C3	kaempferol	lungcancer	TLZ
AKT1	kaempferol	lungcancer	TLZ
AKT1	quercetin	lungcancer	TLZ
ALOX5	kaempferol	lungcancer	TLZ
ALOX5	quercetin	lungcancer	TLZ
AR	kaempferol	lungcancer	TLZ
AR	quercetin	lungcancer	TLZ
AR	isorhamnetin	lungcancer	TLZ
BAX	beta-sitosterol	lungcancer	TLZ
BAX	quercetin	lungcancer	TLZ
BAX	kaempferol	lungcancer	TLZ
BCL2	kaempferol	lungcancer	TLZ
BCL2	beta-sitosterol	lungcancer	TLZ
BCL2	quercetin	lungcancer	TLZ
BCL2L1	quercetin	lungcancer	TLZ
BIRC5	quercetin	lungcancer	TLZ
CALM1	isorhamnetin	lungcancer	TLZ
CALM1	kaempferol	lungcancer	TLZ
CASP3	beta-sitosterol	lungcancer	TLZ
CASP3	quercetin	lungcancer	TLZ
CASP3	kaempferol	lungcancer	TLZ
CASP8	quercetin	lungcancer	TLZ
CASP8	beta-sitosterol	lungcancer	TLZ
CASP9	quercetin	lungcancer	TLZ
CASP9	beta-sitosterol	lungcancer	TLZ
CAV1	quercetin	lungcancer	TLZ
CCL2	quercetin	lungcancer	TLZ
CCNA2	isorhamnetin	lungcancer	TLZ
CCNB1	quercetin	lungcancer	TLZ
CCND1	quercetin	lungcancer	TLZ
CD40LG	quercetin	lungcancer	TLZ
CDC42	quercetin	lungcancer	TLZ
CDC42	kaempferol	lungcancer	TLZ
CDK2	isorhamnetin	lungcancer	TLZ
CDKN1A	quercetin	lungcancer	TLZ
CHEK1	isorhamnetin	lungcancer	TLZ
CHEK2	quercetin	lungcancer	TLZ
CHRM1	kaempferol	lungcancer	TLZ
CHRM1	beta-sitosterol	lungcancer	TLZ
CHRM1	hederagenin	lungcancer	TLZ
CHRM3	beta-sitosterol	lungcancer	TLZ
CHRM3	hederagenin	lungcancer	TLZ
CHRNA2	beta-sitosterol	lungcancer	TLZ
CHRNA7	beta-sitosterol	lungcancer	TLZ
CHUK	quercetin	lungcancer	TLZ
CIT	quercetin	lungcancer	TLZ
CLDN4	quercetin	lungcancer	TLZ
COL1A1	quercetin	lungcancer	TLZ
COL3A1	quercetin	lungcancer	TLZ
CRP	quercetin	lungcancer	TLZ
CTSD	quercetin	lungcancer	TLZ
CXCL10	quercetin	lungcancer	TLZ
CXCL11	quercetin	lungcancer	TLZ
CXCL8	quercetin	lungcancer	TLZ
CYP1A1	quercetin	lungcancer	TLZ
CYP1A1	kaempferol	lungcancer	TLZ
CYP1A2	quercetin	lungcancer	TLZ
CYP1A2	kaempferol	lungcancer	TLZ
CYP1B1	quercetin	lungcancer	TLZ
CYP1B1	kaempferol	lungcancer	TLZ
CYP3A4	quercetin	lungcancer	TLZ
CYP3A4	kaempferol	lungcancer	TLZ
DPP4	quercetin	lungcancer	TLZ
DPP4	kaempferol	lungcancer	TLZ
DPP4	isorhamnetin	lungcancer	TLZ
DRD1	beta-sitosterol	lungcancer	TLZ
DUOX2	quercetin	lungcancer	TLZ
E2F1	quercetin	lungcancer	TLZ
E2F2	quercetin	lungcancer	TLZ
EGF	quercetin	lungcancer	TLZ
EGFR	quercetin	lungcancer	TLZ
EIF2AK1	quercetin	lungcancer	TLZ
EIF6	quercetin	lungcancer	TLZ
ELK1	quercetin	lungcancer	TLZ
ERBB2	quercetin	lungcancer	TLZ
ERBB3	quercetin	lungcancer	TLZ
ESR1	isorhamnetin	lungcancer	TLZ
ESR2	isorhamnetin	lungcancer	TLZ
F10	quercetin	lungcancer	TLZ
F3	quercetin	lungcancer	TLZ
FOS	quercetin	lungcancer	TLZ
GABRA3	hederagenin	lungcancer	TLZ
GABRA3	beta-sitosterol	lungcancer	TLZ
GJA1	quercetin	lungcancer	TLZ
GSK3B	isorhamnetin	lungcancer	TLZ
GSTM1	kaempferol	lungcancer	TLZ
GSTM1	quercetin	lungcancer	TLZ
GSTM2	kaempferol	lungcancer	TLZ
GSTM2	quercetin	lungcancer	TLZ
GSTP1	quercetin	lungcancer	TLZ
GSTP1	kaempferol	lungcancer	TLZ
HIF1A	quercetin	lungcancer	TLZ
HK2	quercetin	lungcancer	TLZ
HMOX1	quercetin	lungcancer	TLZ
HMOX1	kaempferol	lungcancer	TLZ
HSF1	quercetin	lungcancer	TLZ
HSP90AB1	beta-sitosterol	lungcancer	TLZ
HSP90AB1	quercetin	lungcancer	TLZ
HSP90AB1	kaempferol	lungcancer	TLZ
HSP90AB1	isorhamnetin	lungcancer	TLZ
HSPA5	quercetin	lungcancer	TLZ
HSPB1	quercetin	lungcancer	TLZ
ICAM1	kaempferol	lungcancer	TLZ
ICAM1	quercetin	lungcancer	TLZ
IFNG	quercetin	lungcancer	TLZ
IGF2	quercetin	lungcancer	TLZ
IGFBP3	quercetin	lungcancer	TLZ
IKBKB	kaempferol	lungcancer	TLZ
IKBKE	kaempferol	lungcancer	TLZ
IL10	quercetin	lungcancer	TLZ
IL1A	quercetin	lungcancer	TLZ
IL1B	quercetin	lungcancer	TLZ
IL2	quercetin	lungcancer	TLZ
IL6	quercetin	lungcancer	TLZ
INSR	kaempferol	lungcancer	TLZ
INSR	quercetin	lungcancer	TLZ
INSRR	kaempferol	lungcancer	TLZ
INSRR	quercetin	lungcancer	TLZ
IRF1	quercetin	lungcancer	TLZ
JUN	quercetin	lungcancer	TLZ
JUN	beta-sitosterol	lungcancer	TLZ
JUN	kaempferol	lungcancer	TLZ
MAOB	isorhamnetin	lungcancer	TLZ
MAOB	quercetin	lungcancer	TLZ
MAP2	beta-sitosterol	lungcancer	TLZ
MAPK1	quercetin	lungcancer	TLZ
MAPK14	isorhamnetin	lungcancer	TLZ
MAPK8	kaempferol	lungcancer	TLZ
MGAM	quercetin	lungcancer	TLZ
MMP1	kaempferol	lungcancer	TLZ
MMP1	quercetin	lungcancer	TLZ
MMP2	quercetin	lungcancer	TLZ
MMP3	quercetin	lungcancer	TLZ
MMP9	quercetin	lungcancer	TLZ
MPO	quercetin	lungcancer	TLZ
MYC	quercetin	lungcancer	TLZ
NCF1	quercetin	lungcancer	TLZ
NCF1	isorhamnetin	lungcancer	TLZ
NCOA1	isorhamnetin	lungcancer	TLZ
NCOA2	hederagenin	lungcancer	TLZ
NCOA2	isorhamnetin	lungcancer	TLZ
NCOA2	quercetin	lungcancer	TLZ
NCOA2	11,14-eicosadienoic acid	lungcancer	TLZ
NCOA2	kaempferol	lungcancer	TLZ
NCOA2	beta-sitosterol	lungcancer	TLZ
NFE2L2	quercetin	lungcancer	TLZ
NFKBIA	quercetin	lungcancer	TLZ
NOS2	kaempferol	lungcancer	TLZ
NOS2	isorhamnetin	lungcancer	TLZ
NOS3	kaempferol	lungcancer	TLZ
NOS3	isorhamnetin	lungcancer	TLZ
NOS3	quercetin	lungcancer	TLZ
NOS3	quercetin	lungcancer	TLZ
NQO1	quercetin	lungcancer	TLZ
NR1I2	kaempferol	lungcancer	TLZ
NR1I2	quercetin	lungcancer	TLZ
NR1I3	quercetin	lungcancer	TLZ
NR1I3	kaempferol	lungcancer	TLZ
NR3C2	Cynotoxin	lungcancer	TLZ
NR3C2	K-STROPHANTHOSIDE_qt	lungcancer	TLZ
ODC1	quercetin	lungcancer	TLZ
OPRM1	beta-sitosterol	lungcancer	TLZ
PARP1	quercetin	lungcancer	TLZ
PGR	hederagenin	lungcancer	TLZ
PGR	beta-sitosterol	lungcancer	TLZ
PGR	kaempferol	lungcancer	TLZ
PIK3CG	beta-sitosterol	lungcancer	TLZ
PIK3CG	kaempferol	lungcancer	TLZ
PIK3CG	isorhamnetin	lungcancer	TLZ
PIK3CG	quercetin	lungcancer	TLZ
PIM1	isorhamnetin	lungcancer	TLZ
PLAT	quercetin	lungcancer	TLZ
PLAU	quercetin	lungcancer	TLZ
PON1	beta-sitosterol	lungcancer	TLZ
PON1	quercetin	lungcancer	TLZ
POR	quercetin	lungcancer	TLZ
PPARA	quercetin	lungcancer	TLZ
PPARD	isorhamnetin	lungcancer	TLZ
PPARD	quercetin	lungcancer	TLZ
PPARG	quercetin	lungcancer	TLZ
PPARG	quercetin	lungcancer	TLZ
PPARG	isorhamnetin	lungcancer	TLZ
PPARG	kaempferol	lungcancer	TLZ
PPARG	kaempferol	lungcancer	TLZ
PPP3CA	kaempferol	lungcancer	TLZ
PRKCA	quercetin	lungcancer	TLZ
PRKCA	beta-sitosterol	lungcancer	TLZ
PRKCB	quercetin	lungcancer	TLZ
PTEN	quercetin	lungcancer	TLZ
PTGER3	quercetin	lungcancer	TLZ
PTGS1	quercetin	lungcancer	TLZ
PTGS1	Dihomolinolenic acid	lungcancer	TLZ
PTGS1	hederagenin	lungcancer	TLZ
PTGS1	kaempferol	lungcancer	TLZ
PTGS1	beta-sitosterol	lungcancer	TLZ
PTGS1	isorhamnetin	lungcancer	TLZ
PTGS2	hederagenin	lungcancer	TLZ
PTGS2	kaempferol	lungcancer	TLZ
PTGS2	Dihomolinolenic acid	lungcancer	TLZ
PTGS2	quercetin	lungcancer	TLZ
PTGS2	beta-sitosterol	lungcancer	TLZ
PTGS2	isorhamnetin	lungcancer	TLZ
PTPN1	isorhamnetin	lungcancer	TLZ
PYGM	isorhamnetin	lungcancer	TLZ
RAF1	quercetin	lungcancer	TLZ
RASA1	quercetin	lungcancer	TLZ
RASSF1	quercetin	lungcancer	TLZ
RB1	quercetin	lungcancer	TLZ
RELA	kaempferol	lungcancer	TLZ
RELA	isorhamnetin	lungcancer	TLZ
RELA	quercetin	lungcancer	TLZ
RUNX1T1	quercetin	lungcancer	TLZ
RUNX2	quercetin	lungcancer	TLZ
RXRA	hederagenin	lungcancer	TLZ
RXRA	quercetin	lungcancer	TLZ
SCN5A	beta-sitosterol	lungcancer	TLZ
SCN5A	hederagenin	lungcancer	TLZ
SCN5A	quercetin	lungcancer	TLZ
SELE	kaempferol	lungcancer	TLZ
SELE	quercetin	lungcancer	TLZ
SERPINE1	quercetin	lungcancer	TLZ
SLC6A2	hederagenin	lungcancer	TLZ
SLC6A2	kaempferol	lungcancer	TLZ
SOD1	quercetin	lungcancer	TLZ
SPP1	quercetin	lungcancer	TLZ
STAT1	kaempferol	lungcancer	TLZ
STAT1	quercetin	lungcancer	TLZ
SULT1E1	quercetin	lungcancer	TLZ
TGFB1	beta-sitosterol	lungcancer	TLZ
TGFB1	quercetin	lungcancer	TLZ
THBD	quercetin	lungcancer	TLZ
TNF	kaempferol	lungcancer	TLZ
TNF	quercetin	lungcancer	TLZ
TOP1	quercetin	lungcancer	TLZ
TOP2A	kaempferol	lungcancer	TLZ
TOP2A	quercetin	lungcancer	TLZ
TOP2A	quercetin	lungcancer	TLZ
TP53	quercetin	lungcancer	TLZ
VCAM1	kaempferol	lungcancer	TLZ
VCAM1	quercetin	lungcancer	TLZ
VEGFA	quercetin	lungcancer	TLZ
XDH	kaempferol	lungcancer	TLZ
XDH	isorhamnetin	lungcancer	TLZ
XDH	quercetin	lungcancer	TLZ
ABCG2	quercetin	lungcancer	XHC
ACACA	quercetin	lungcancer	XHC
ACHE	quercetin	lungcancer	XHC
ACHE	kaempferol	lungcancer	XHC
ADRB2	quercetin	lungcancer	XHC
AHR	quercetin	lungcancer	XHC
AHR	kaempferol	lungcancer	XHC
AHSA1	kaempferol	lungcancer	XHC
AHSA1	quercetin	lungcancer	XHC
AKR1B1	quercetin	lungcancer	XHC
AKR1C3	kaempferol	lungcancer	XHC
AKT1	kaempferol	lungcancer	XHC
AKT1	quercetin	lungcancer	XHC
AKT1	luteolin	lungcancer	XHC
ALOX5	kaempferol	lungcancer	XHC
ALOX5	Gallicacid	lungcancer	XHC
ALOX5	quercetin	lungcancer	XHC
APP	luteolin	lungcancer	XHC
AR	ellagic acid	lungcancer	XHC
AR	luteolin	lungcancer	XHC
AR	quercetin	lungcancer	XHC
AR	kaempferol	lungcancer	XHC
BAX	kaempferol	lungcancer	XHC
BAX	quercetin	lungcancer	XHC
BCL2	quercetin	lungcancer	XHC
BCL2	kaempferol	lungcancer	XHC
BCL2L1	quercetin	lungcancer	XHC
BCL2L1	luteolin	lungcancer	XHC
BIRC5	luteolin	lungcancer	XHC
BIRC5	quercetin	lungcancer	XHC
CALM1	(+)-catechin	lungcancer	XHC
CALM1	kaempferol	lungcancer	XHC
CASP3	luteolin	lungcancer	XHC
CASP3	quercetin	lungcancer	XHC
CASP3	kaempferol	lungcancer	XHC
CASP7	luteolin	lungcancer	XHC
CASP8	quercetin	lungcancer	XHC
CASP9	luteolin	lungcancer	XHC
CASP9	quercetin	lungcancer	XHC
CAT	(+)-catechin	lungcancer	XHC
CAV1	quercetin	lungcancer	XHC
CCL2	quercetin	lungcancer	XHC
CCNB1	quercetin	lungcancer	XHC
CCNB1	luteolin	lungcancer	XHC
CCND1	luteolin	lungcancer	XHC
CCND1	quercetin	lungcancer	XHC
CD40LG	quercetin	lungcancer	XHC
CD40LG	luteolin	lungcancer	XHC
CDK2	ellagic acid	lungcancer	XHC
CDKN1A	luteolin	lungcancer	XHC
CDKN1A	ellagic acid	lungcancer	XHC
CDKN1A	quercetin	lungcancer	XHC
CHEK2	quercetin	lungcancer	XHC
CHRM1	kaempferol	lungcancer	XHC
CHUK	quercetin	lungcancer	XHC
CIT	quercetin	lungcancer	XHC
CLDN4	quercetin	lungcancer	XHC
COL1A1	quercetin	lungcancer	XHC
COL3A1	quercetin	lungcancer	XHC
CRP	quercetin	lungcancer	XHC
CTSD	quercetin	lungcancer	XHC
CXCL10	quercetin	lungcancer	XHC
CXCL11	quercetin	lungcancer	XHC
CXCL8	quercetin	lungcancer	XHC
CXCL8	ellagic acid	lungcancer	XHC
CYP1A1	quercetin	lungcancer	XHC
CYP1A1	kaempferol	lungcancer	XHC
CYP1A2	quercetin	lungcancer	XHC
CYP1A2	kaempferol	lungcancer	XHC
CYP1B1	kaempferol	lungcancer	XHC
CYP1B1	quercetin	lungcancer	XHC
CYP27B1	Gamma-Sitosterol	lungcancer	XHC
CYP3A4	quercetin	lungcancer	XHC
CYP3A4	kaempferol	lungcancer	XHC
DPP4	quercetin	lungcancer	XHC
DPP4	kaempferol	lungcancer	XHC
DPP4	luteolin	lungcancer	XHC
DUOX2	quercetin	lungcancer	XHC
E2F1	quercetin	lungcancer	XHC
E2F2	quercetin	lungcancer	XHC
EGF	quercetin	lungcancer	XHC
EGFR	quercetin	lungcancer	XHC
EGFR	luteolin	lungcancer	XHC
EIF2AK1	luteolin	lungcancer	XHC
EIF2AK1	quercetin	lungcancer	XHC
EIF6	quercetin	lungcancer	XHC
ELK1	quercetin	lungcancer	XHC
ERBB2	quercetin	lungcancer	XHC
ERBB2	luteolin	lungcancer	XHC
ERBB3	quercetin	lungcancer	XHC
ESR1	ellagic acid	lungcancer	XHC
ESR1	Gamma-Sitosterol	lungcancer	XHC
ESR1	(+)-catechin	lungcancer	XHC
F10	quercetin	lungcancer	XHC
F2	Ellipticine	lungcancer	XHC
F2	quercetin	lungcancer	XHC
F2	kaempferol	lungcancer	XHC
F3	quercetin	lungcancer	XHC
FOS	quercetin	lungcancer	XHC
GABRB3	Ruvoside	lungcancer	XHC
GABRB3	Ellipticine	lungcancer	XHC
GC	Gamma-Sitosterol	lungcancer	XHC
GJA1	quercetin	lungcancer	XHC
GSTA1	ellagic acid	lungcancer	XHC
GSTA2	ellagic acid	lungcancer	XHC
GSTM1	quercetin	lungcancer	XHC
GSTM1	kaempferol	lungcancer	XHC
GSTM1	ellagic acid	lungcancer	XHC
GSTM2	kaempferol	lungcancer	XHC
GSTM2	ellagic acid	lungcancer	XHC
GSTM2	quercetin	lungcancer	XHC
GSTP1	luteolin	lungcancer	XHC
GSTP1	kaempferol	lungcancer	XHC
GSTP1	ellagic acid	lungcancer	XHC
GSTP1	quercetin	lungcancer	XHC
HIF1A	quercetin	lungcancer	XHC
HK2	quercetin	lungcancer	XHC
HMOX1	quercetin	lungcancer	XHC
HMOX1	luteolin	lungcancer	XHC
HMOX1	kaempferol	lungcancer	XHC
HSF1	quercetin	lungcancer	XHC
HSP90AA1	(+)-catechin	lungcancer	XHC
HSP90AA1	quercetin	lungcancer	XHC
HSP90AA1	kaempferol	lungcancer	XHC
HSP90AA1	luteolin	lungcancer	XHC
[truncated: 664 more rows]
