# Supplementary material for: A Comprehensive Network Pharmacology-Based Strategy to Investigate Multiple Mechanisms of HeChan Tablet on Lung Cancer
Source: Evid Based Complement Alternat Med. 2020 May 30;2020:7658342. doi: 10.1155/2020/7658342 (PMC7277035; doi:10.1155/2020/7658342)
Supplement: Supplementary Materials — Supplementary file 1: compounds and putative target genes of HCT. Supplementary file 2: 507 common target genes among HCT and related genes of lung cancer. Supplementary file 3: 34 common target genes among HCT and known therapeutic genes of lung cancer. Supplementary file 4: hub gene information of common HCT-related genes of lung cancer PPI network. Supplementary file 5: hub gene information of HCT-known therapeutic genes of lung cancer PPI network, Supplementary file 6: information of hub genes filtered by PPI networks. [file 7658342.f1.zip › 7658342.f1/Supplementary file 3_ECAM_3084839.xlsx]

## Sheet: Sheet1
Common gene targets between known therapeutic target genes of lung cancer and HCT
BCL2
DNMT1
DRD2
IL2
IL2RA
MAP2
PRKCA
PTGS2
TNF
TOP2
TOP2A
TYMS
VEGFA
ATM
MAPK1
ABL1
ALK
DHFR
INSR
NR1I2
RRM1
TOP1
CHEK1
EGFR
ERBB2
ERBB3
MMP2
MTOR
NFE2L2
MET
TOP2B
TUBB
TUBB1
TUBB3

## Sheet: Sheet 2
Gene	Source	Compounds	Herbs
BCL2	Drugbank	beta-sitosterol	BX
BCL2	Drugbank	baicalein	BX
BCL2	Drugbank	Trigonelline	BX
BCL2	TTD	beta-sitosterol	BX
BCL2	TTD	baicalein	BX
BCL2	TTD	Trigonelline	BX
DNMT1	TTD	Guanosine	BX
DRD2	TTD	(S)-Tyrosine	BX
IL2	TTD	Ephedrine	BX
IL2RA	TTD	Ephedrine	BX
MAP2	Drugbank	beta-sitosterol	BX
PRKCA	TTD	beta-sitosterol	BX
PTGS2	TTD	Stigmasterol	BX
PTGS2	TTD	coniferin	BX
PTGS2	TTD	beta-sitosterol	BX
PTGS2	TTD	Cavidine	BX
PTGS2	TTD	beta-D-Ribofuranoside, xanthine-9	BX
PTGS2	TTD	(3S,6S)-3-(benzyl)-6-(4-hydroxybenzyl)piperazine-2,5-quinone	BX
PTGS2	TTD	baicalein	BX
PTGS2	TTD	Trigonelline	BX
TNF	TTD	Ephedrine	BX
TOP2	TTD	coniferin	BX
TOP2A	Drugbank	Cavidine	BX
TYMS	Drugbank	Valine	BX
TYMS	Drugbank	L-Alanine	BX
VEGFA	TTD	baicalein	BX
ATM	TTD	Dehydrobufotenine	GCP
MAPK1	TTD	Adrenaline	GCP
PTGS2	TTD	Tryptanthrin	GCP
TNF	TTD	Adrenaline	GCP
BCL2	Drugbank	beta-sitosterol	YXC
BCL2	TTD	beta-sitosterol	YXC
MAP2	Drugbank	beta-sitosterol	YXC
PRKCA	TTD	beta-sitosterol	YXC
PTGS2	TTD	beta-sitosterol	YXC
PTGS2	TTD	7-O-Methyleriodictyol	YXC
PTGS2	TTD	Mandenol	YXC
PTGS2	TTD	Stigmasterol	YXC
ABL1	Drugbank	Adenosine Triphosphate	RS
ALK	TTD	Adenosine Triphosphate	RS
ALK	Drugbank	Adenosine Triphosphate	RS
BCL2	Drugbank	beta-sitosterol	RS
BCL2	Drugbank	kaempferol	RS
BCL2	TTD	beta-sitosterol	RS
BCL2	TTD	kaempferol	RS
DHFR	Drugbank	Elemicin	RS
DNMT1	TTD	Guanosine	RS
DRD2	TTD	Putrescine	RS
INSR	Drugbank	kaempferol	RS
MAP2	Drugbank	beta-sitosterol	RS
NR1I2	Drugbank	kaempferol	RS
PRKCA	TTD	beta-sitosterol	RS
PRKCA	TTD	20-Hexadecanoylingenol	RS
PTGS2	TTD	Girinimbin	RS
PTGS2	TTD	kaempferol	RS
PTGS2	TTD	arachidonate	RS
PTGS2	TTD	beta-sitosterol	RS
PTGS2	TTD	Palmitoleic Acid	RS
PTGS2	TTD	Stigmasterol	RS
PTGS2	TTD	suchilactone	RS
PTGS2	TTD	Fumarine	RS
PTGS2	TTD	Dianthramine	RS
PTGS2	TTD	Inermin	RS
PTGS2	TTD	Malvic Acid	RS
PTGS2	TTD	Dianthramine	RS
PTGS2	TTD	Frutinone A	RS
PTGS2	TTD	3,5-Dimethyl-4-Methoxybenzoic Acid	RS
PTGS2	TTD	ginsenoside rh2	RS
RRM1	Drugbank	Adenosine Triphosphate	RS
RRM1	Drugbank	Adenosine	RS
TNF	TTD	ginsenoside rh2	RS
TNF	TTD	3,5-Dimethyl-4-Methoxybenzoic Acid	RS
TNF	TTD	Palmitoleic Acid	RS
TNF	TTD	kaempferol	RS
TNF	TTD	Malvic Acid	RS
TOP1	TTD	Mannose	RS
TOP1	Drugbank	Mannose	RS
TOP2A	Drugbank	kaempferol	RS
TOP2A	Drugbank	Fumarine	RS
TYMS	Drugbank	Uridine	RS
TYMS	Drugbank	Elemicin	RS
BCL2	Drugbank	beta-sitosterol	TD
BCL2	Drugbank	quercetin	TD
BCL2	TTD	beta-sitosterol	TD
BCL2	TTD	quercetin	TD
CHEK1	TTD	7-Methoxy-2-methyl isoflavone	TD
EGFR	Drugbank	quercetin	TD
EGFR	TTD	quercetin	TD
ERBB2	Drugbank	quercetin	TD
ERBB3	TTD	quercetin	TD
IL2	TTD	quercetin	TD
INSR	Drugbank	quercetin	TD
MAP2	Drugbank	beta-sitosterol	TD
MAPK1	TTD	quercetin	TD
MMP2	TTD	quercetin	TD
MTOR	TTD	diosgenin	TD
NFE2L2	TTD	quercetin	TD
NR1I2	Drugbank	diosgenin	TD
NR1I2	Drugbank	quercetin	TD
PRKCA	TTD	quercetin	TD
PRKCA	TTD	beta-sitosterol	TD
PTGS2	TTD	7-Methoxy-2-methyl isoflavone	TD
PTGS2	TTD	beta-sitosterol	TD
PTGS2	TTD	diosgenin	TD
PTGS2	TTD	Stigmasterol	TD
PTGS2	TTD	quercetin	TD
TNF	TTD	quercetin	TD
TOP1	TTD	quercetin	TD
TOP1	Drugbank	quercetin	TD
TOP2	TTD	quercetin	TD
TOP2A	Drugbank	quercetin	TD
TYMS	Drugbank	Asparagine	TD
TYMS	Drugbank	Asparamide	TD
VEGFA	TTD	diosgenin	TD
VEGFA	TTD	quercetin	TD
BCL2	Drugbank	kaempferol	TLZ
BCL2	Drugbank	beta-sitosterol	TLZ
BCL2	Drugbank	quercetin	TLZ
BCL2	TTD	kaempferol	TLZ
BCL2	TTD	beta-sitosterol	TLZ
BCL2	TTD	quercetin	TLZ
CHEK1	TTD	isorhamnetin	TLZ
EGFR	Drugbank	quercetin	TLZ
EGFR	TTD	quercetin	TLZ
ERBB2	Drugbank	quercetin	TLZ
ERBB3	TTD	quercetin	TLZ
IL2	TTD	quercetin	TLZ
INSR	Drugbank	quercetin	TLZ
INSR	Drugbank	kaempferol	TLZ
MAP2	Drugbank	beta-sitosterol	TLZ
MAPK1	TTD	quercetin	TLZ
MMP2	TTD	quercetin	TLZ
NFE2L2	TTD	quercetin	TLZ
NR1I2	Drugbank	quercetin	TLZ
NR1I2	Drugbank	kaempferol	TLZ
PRKCA	TTD	beta-sitosterol	TLZ
PRKCA	TTD	quercetin	TLZ
PTGS2	TTD	isorhamnetin	TLZ
PTGS2	TTD	quercetin	TLZ
PTGS2	TTD	hederagenin	TLZ
PTGS2	TTD	kaempferol	TLZ
PTGS2	TTD	beta-sitosterol	TLZ
PTGS2	TTD	Dihomolinolenic acid	TLZ
TNF	TTD	kaempferol	TLZ
TNF	TTD	quercetin	TLZ
TOP1	TTD	quercetin	TLZ
TOP1	Drugbank	quercetin	TLZ
TOP2A	Drugbank	kaempferol	TLZ
TOP2A	Drugbank	quercetin	TLZ
TOP2A	Drugbank	quercetin	TLZ
VEGFA	TTD	quercetin	TLZ
BCL2	Drugbank	quercetin	XHC
BCL2	Drugbank	kaempferol	XHC
BCL2	TTD	quercetin	XHC
BCL2	TTD	kaempferol	XHC
EGFR	Drugbank	luteolin	XHC
EGFR	Drugbank	quercetin	XHC
EGFR	TTD	luteolin	XHC
EGFR	TTD	quercetin	XHC
ERBB2	Drugbank	quercetin	XHC
ERBB2	Drugbank	luteolin	XHC
ERBB3	TTD	quercetin	XHC
IL2	TTD	luteolin	XHC
IL2	TTD	quercetin	XHC
INSR	Drugbank	quercetin	XHC
INSR	Drugbank	luteolin	XHC
INSR	Drugbank	kaempferol	XHC
MAPK1	TTD	luteolin	XHC
MAPK1	TTD	quercetin	XHC
MET	Drugbank	luteolin	XHC
MMP2	TTD	quercetin	XHC
MMP2	TTD	luteolin	XHC
MMP2	TTD	ellagic acid	XHC
NFE2L2	TTD	quercetin	XHC
NR1I2	Drugbank	Gallicacid	XHC
NR1I2	Drugbank	quercetin	XHC
NR1I2	Drugbank	kaempferol	XHC
PRKCA	TTD	quercetin	XHC
PRKCA	TTD	Gallicacid	XHC
PTGS2	TTD	(+)-catechin	XHC
PTGS2	TTD	quercetin	XHC
PTGS2	TTD	luteolin	XHC
PTGS2	TTD	kaempferol	XHC
TNF	TTD	luteolin	XHC
TNF	TTD	kaempferol	XHC
TNF	TTD	Caffeic Acid Dimethyl Ether	XHC
TNF	TTD	quercetin	XHC
TOP1	TTD	luteolin	XHC
TOP1	TTD	quercetin	XHC
TOP1	Drugbank	luteolin	XHC
TOP1	Drugbank	quercetin	XHC
TOP2A	Drugbank	Agrimonolide-6-O-Beta-D-Glucopyranoside	XHC
TOP2A	Drugbank	quercetin	XHC
TOP2A	Drugbank	Ellipticine	XHC
TOP2A	Drugbank	quercetin	XHC
TOP2A	Drugbank	quercetin	XHC
TOP2A	Drugbank	kaempferol	XHC
TOP2A	Drugbank	luteolin	XHC
TOP2A	Drugbank	quercetin	XHC
TOP2B	Drugbank	Agrimonolide-6-O-Beta-D-Glucopyranoside	XHC
VEGFA	TTD	luteolin	XHC
VEGFA	TTD	ellagic acid	XHC
VEGFA	TTD	quercetin	XHC
BCL2	Drugbank	kaempferol	YXC
BCL2	Drugbank	quercetin	YXC
BCL2	TTD	kaempferol	YXC
BCL2	TTD	quercetin	YXC
DRD2	TTD	Laurifoline	YXC
EGFR	Drugbank	quercetin	YXC
EGFR	TTD	quercetin	YXC
ERBB2	Drugbank	quercetin	YXC
ERBB3	TTD	quercetin	YXC
IL2	TTD	quercetin	YXC
INSR	Drugbank	quercetin	YXC
INSR	Drugbank	kaempferol	YXC
MAPK1	TTD	quercetin	YXC
MMP2	TTD	quercetin	YXC
NFE2L2	TTD	quercetin	YXC
NR1I2	Drugbank	kaempferol	YXC
NR1I2	Drugbank	quercetin	YXC
PRKCA	TTD	quercetin	YXC
PRKCA	TTD	20-Hexadecanoylingenol	YXC
PTGS2	TTD	quercetin	YXC
PTGS2	TTD	Norcepharadione B	YXC
PTGS2	TTD	1-Methyl-2-Nonyl-4(1h)-Quinolone	YXC
PTGS2	TTD	kaempferol	YXC
PTGS2	TTD	Cepharadione B	YXC
TNF	TTD	Carvacrol	YXC
TNF	TTD	Thymol	YXC
TNF	TTD	kaempferol	YXC
TNF	TTD	quercetin	YXC
TOP1	TTD	quercetin	YXC
TOP1	Drugbank	quercetin	YXC
TOP2A	Drugbank	quercetin	YXC
TOP2A	Drugbank	quercetin	YXC
TOP2A	Drugbank	kaempferol	YXC
TOP2A	Drugbank	quercetin	YXC
VEGFA	TTD	quercetin	YXC
BCL2	Drugbank	beta-sitosterol	ZBM
BCL2	TTD	beta-sitosterol	ZBM
MAP2	Drugbank	beta-sitosterol	ZBM
PRKCA	TTD	beta-sitosterol	ZBM
PTGS2	TTD	Zhebeiresinol	ZBM
PTGS2	TTD	6-Methoxyl-2-acetyl-3-methyl-1,4-naphthoquinone-8-O-beta-D-glucopyranoside	ZBM
PTGS2	TTD	pelargonidin	ZBM
PTGS2	TTD	beta-sitosterol	ZBM
RRM1	Drugbank	Adenosine	ZBM
TNF	TTD	Thymine	ZBM
TOP2A	Drugbank	6-Methoxyl-2-acetyl-3-methyl-1,4-naphthoquinone-8-O-beta-D-glucopyranoside	ZBM
TOP2A	Drugbank	Picropodophyllin	ZBM
TOP2B	Drugbank	Picropodophyllin	ZBM
TUBB	Drugbank	Picropodophyllin	ZBM
TUBB	TTD	Picropodophyllin	ZBM
TUBB1	Drugbank	Picropodophyllin	ZBM
TUBB3	Drugbank	Picropodophyllin	ZBM
TYMS	Drugbank	Thymidine	ZBM
