# Supplementary material for: A Comprehensive Network Pharmacology-Based Strategy to Investigate Multiple Mechanisms of HeChan Tablet on Lung Cancer
Source: Evid Based Complement Alternat Med. 2020 May 30;2020:7658342. doi: 10.1155/2020/7658342 (PMC7277035; doi:10.1155/2020/7658342)
Supplement: Supplementary Materials — Supplementary file 1: compounds and putative target genes of HCT. Supplementary file 2: 507 common target genes among HCT and related genes of lung cancer. Supplementary file 3: 34 common target genes among HCT and known therapeutic genes of lung cancer. Supplementary file 4: hub gene information of common HCT-related genes of lung cancer PPI network. Supplementary file 5: hub gene information of HCT-known therapeutic genes of lung cancer PPI network, Supplementary file 6: information of hub genes filtered by PPI networks. [file 7658342.f1.zip › 7658342.f1/Supplementary file 4_ECAM_3084840.xlsx]

## Sheet: sheet 1
	shared.name	SUID	AverageShortestPathLength	BetweennessCentrality	ClosenessCentrality	ClusteringCoefficient	Degree	Eccentricity	IsSingleNode	name	NeighborhoodConnectivity	NumberOfDirectedEdges	NumberOfUndirectedEdges	PartnerOfMultiEdgedNodePairs	Radiality	selected	SelfLoops	Stress	TopologicalCoefficient
1	CASP9	156	2.52846	0.0016208	0.395498	0.403333	25	5	FALSE	CASP9	47.96	25	0	0	0.781649	FALSE	0	7680	0.188819
2	TRAF2	167	2.69919	0.00206525	0.370482	0.303333	25	5	FALSE	TRAF2	35.8	25	0	0	0.757259	FALSE	0	7082	0.17549
3	NCOA2	181	2.63008	0.00352361	0.380216	0.28	25	5	FALSE	NCOA2	25.24	25	0	0	0.767131	FALSE	0	11662	0.121346
4	MCL1	341	2.53455	0.00134116	0.394547	0.493333	25	5	FALSE	MCL1	48.56	25	0	0	0.780778	FALSE	0	6550	0.190431
5	PIK3CD	423	2.69919	0.00047424	0.370482	0.49	25	6	FALSE	PIK3CD	36.08	25	0	0	0.757259	FALSE	0	2726	0.177734
6	VCAM1	425	2.56098	0.00343443	0.390476	0.533333	25	5	FALSE	VCAM1	43.72	25	0	0	0.777003	FALSE	0	11696	0.190742
7	RAF1	828	2.49797	0.00124381	0.400325	0.393333	25	5	FALSE	RAF1	46.16	25	0	0	0.786005	FALSE	0	7082	0.173534
8	CCNB1	73	2.60569	0.00231774	0.383775	0.535385	26	6	FALSE	CCNB1	37.5385	26	0	0	0.770616	FALSE	0	13386	0.166838
9	CDKN1A	75	2.56301	0.00191553	0.390167	0.486154	26	5	FALSE	CDKN1A	44.6154	26	0	0	0.776713	FALSE	0	9890	0.184361
10	HIF1A	138	2.43902	0.0057142	0.41	0.446154	26	5	FALSE	HIF1A	51.2308	26	0	0	0.794425	FALSE	0	16518	0.18283
11	CHEK1	151	2.69512	0.00228848	0.371041	0.452308	26	6	FALSE	CHEK1	29.5769	26	0	0	0.75784	FALSE	0	11506	0.154853
12	E2F1	205	2.63008	0.00298506	0.380216	0.424615	26	6	FALSE	E2F1	34.1154	26	0	0	0.767131	FALSE	0	12964	0.160166
13	CRP	1019	2.59756	0.00144278	0.384977	0.492308	26	5	FALSE	CRP	38.2692	26	0	0	0.771777	FALSE	0	5928	0.177818
14	OPRM1	1539	2.68089	0.00548059	0.37301	0.683077	26	5	FALSE	OPRM1	31.0769	26	0	0	0.759872	FALSE	0	17524	0.162505
15	CCNA2	158	2.59959	0.00326861	0.384676	0.532764	27	6	FALSE	CCNA2	36.2593	27	0	0	0.771487	FALSE	0	15252	0.161152
16	IL13	474	2.55081	0.00253363	0.392032	0.529915	27	5	FALSE	IL13	42.7778	27	0	0	0.778455	FALSE	0	11526	0.179739
17	PGR	667	2.51626	0.00126829	0.397415	0.461538	27	5	FALSE	PGR	50.1111	27	0	0	0.783391	FALSE	0	8346	0.194229
18	ATM	117	2.64837	0.00216542	0.37759	0.383598	28	6	FALSE	ATM	36.75	28	0	0	0.764518	FALSE	0	11598	0.170139
19	PIK3CB	281	2.67276	0.0005959	0.374144	0.489418	28	6	FALSE	PIK3CB	36.8214	28	0	0	0.761034	FALSE	0	3444	0.17534
20	HSP90AB1	291	2.4939	0.00410065	0.400978	0.277778	28	5	FALSE	HSP90AB1	36.75	28	0	0	0.786585	FALSE	0	16300	0.140805
21	CYP1A1	308	2.67886	0.0111221	0.373293	0.253968	28	5	FALSE	CYP1A1	19.9286	28	0	0	0.760163	FALSE	0	36446	0.101676
22	ATF4	354	2.46341	0.00511166	0.405941	0.338624	28	5	FALSE	ATF4	39.9643	28	0	0	0.790941	FALSE	0	14342	0.15182
23	ATF2	472	2.47967	0.00182012	0.403279	0.420635	28	5	FALSE	ATF2	46.7857	28	0	0	0.788618	FALSE	0	8434	0.17655
24	DRD2	550	2.7561	0.0135493	0.362832	0.587302	28	5	FALSE	DRD2	25.8571	28	0	0	0.749129	FALSE	0	37160	0.156061
25	CYP3A4	1214	2.72967	0.0145883	0.366344	0.21164	28	5	FALSE	CYP3A4	15.5	28	0	0	0.752904	FALSE	0	37232	0.0948729
26	PCNA	76	2.75407	0.00325128	0.3631	0.440887	29	5	FALSE	PCNA	26.4483	29	0	0	0.749419	FALSE	0	17106	0.154668
27	GSK3B	104	2.43496	0.00321421	0.410684	0.325123	29	5	FALSE	GSK3B	44.4138	29	0	0	0.795006	FALSE	0	12306	0.158056
28	MDM2	141	2.56504	0.00196565	0.389857	0.450739	29	5	FALSE	MDM2	41.5172	29	0	0	0.776423	FALSE	0	8114	0.170011
29	NCOA1	246	2.57114	0.00532771	0.388933	0.253695	29	5	FALSE	NCOA1	26.2069	29	0	0	0.775552	FALSE	0	15970	0.11752
30	CAT	344	2.41463	0.0228062	0.414141	0.206897	29	5	FALSE	CAT	33.1724	29	0	0	0.797909	FALSE	0	62420	0.11756
31	AGTR2	453	2.69106	0.00187243	0.371601	0.6133	29	5	FALSE	AGTR2	32.0345	29	0	0	0.75842	FALSE	0	8322	0.166846
32	ABL1	592	2.48171	0.00687219	0.402948	0.376847	29	5	FALSE	ABL1	42.2759	29	0	0	0.788328	FALSE	0	20670	0.159532
33	SERPINE1	186	2.4187	0.0059372	0.413445	0.427586	30	5	FALSE	SERPINE1	45.1667	30	0	0	0.797329	FALSE	0	22488	0.160735
34	NOS2	482	2.4187	0.0135095	0.413445	0.328736	30	5	FALSE	NOS2	37.2667	30	0	0	0.797329	FALSE	0	40640	0.134053
35	TYMS	162	2.87398	0.0148644	0.347949	0.311828	31	5	FALSE	TYMS	17.7419	31	0	0	0.732288	FALSE	0	40644	0.144243
36	NFKBIA	215	2.4187	0.00535277	0.413445	0.378495	31	5	FALSE	NFKBIA	47.7419	31	0	0	0.797329	FALSE	0	19036	0.169785
37	PRKCD	900	2.4939	0.00555135	0.400978	0.264516	31	5	FALSE	PRKCD	38.2581	31	0	0	0.786585	FALSE	0	19040	0.141174
38	CDK2	101	2.53862	0.00640386	0.393915	0.389113	32	5	FALSE	CDK2	36.2188	32	0	0	0.780197	FALSE	0	33066	0.150285
39	CASP8	106	2.43293	0.00396372	0.411028	0.370968	32	5	FALSE	CASP8	42.375	32	0	0	0.795296	FALSE	0	16736	0.148164
40	TGFB1	301	2.46545	0.00490559	0.405606	0.370968	32	5	FALSE	TGFB1	43.9062	32	0	0	0.79065	FALSE	0	16478	0.168223
41	AGTR1	350	2.45935	0.00383621	0.406612	0.409274	32	5	FALSE	AGTR1	41.375	32	0	0	0.791521	FALSE	0	17562	0.156132
42	MMP2	834	2.47358	0.00262805	0.404273	0.459677	32	5	FALSE	MMP2	46.5312	32	0	0	0.789489	FALSE	0	12398	0.17493
43	PRKCB	901	2.51626	0.0103198	0.397415	0.215726	32	5	FALSE	PRKCB	30.5312	32	0	0	0.783391	FALSE	0	30864	0.122364
44	PPP2CA	200	2.39634	0.00799093	0.417303	0.293561	33	5	FALSE	PPP2CA	41.9091	33	0	0	0.800523	FALSE	0	28032	0.141482
45	CDC42	257	2.50203	0.0101277	0.399675	0.314394	33	6	FALSE	CDC42	42.2727	33	0	0	0.785424	FALSE	0	32712	0.162981
46	IFNG	563	2.53862	0.00145582	0.393915	0.441288	33	5	FALSE	IFNG	41.1212	33	0	0	0.780197	FALSE	0	8542	0.174242
47	RXRA	240	2.34553	0.0162838	0.426343	0.231729	34	4	FALSE	RXRA	30.5588	34	0	0	0.807782	FALSE	0	40996	0.0985768
48	AVP	419	2.49593	0.017179	0.400651	0.354724	34	5	FALSE	AVP	29.4118	34	0	0	0.786295	FALSE	0	50024	0.121536
49	BCL2L1	177	2.37602	0.00494997	0.420873	0.403361	35	5	FALSE	BCL2L1	47.1714	35	0	0	0.803426	FALSE	0	22304	0.155587
50	NR3C1	233	2.36382	0.0104242	0.423044	0.356303	35	5	FALSE	NR3C1	45.5714	35	0	0	0.805168	FALSE	0	33820	0.153861
51	HMOX1	371	2.32317	0.00420854	0.430446	0.463492	36	5	FALSE	HMOX1	49.1111	36	0	0	0.810976	FALSE	0	19912	0.155908
52	CXCL10	497	2.6565	0.00278253	0.376435	0.51746	36	5	FALSE	CXCL10	36.8611	36	0	0	0.763357	FALSE	0	13000	0.182481
53	PIK3R3	304	2.46341	0.00271969	0.405941	0.384384	37	5	FALSE	PIK3R3	35.2703	37	0	0	0.790941	FALSE	0	16432	0.134107
54	ICAM1	687	2.43699	0.00134026	0.410342	0.533033	37	5	FALSE	ICAM1	48.5946	37	0	0	0.794715	FALSE	0	9502	0.176067
55	TLR4	1111	2.44309	0.00297541	0.409318	0.475976	37	5	FALSE	TLR4	45.5676	37	0	0	0.793844	FALSE	0	13144	0.170564
56	RB1	120	2.48374	0.00879817	0.402619	0.322902	38	5	FALSE	RB1	37.7368	38	0	0	0.788037	FALSE	0	38990	0.144586
57	GRB2	223	2.43902	0.00378331	0.41	0.364154	38	5	FALSE	GRB2	41.9474	38	0	0	0.794425	FALSE	0	17696	0.150349
58	CAV1	435	2.43293	0.0118634	0.411028	0.308677	38	5	FALSE	CAV1	39.6316	38	0	0	0.795296	FALSE	0	35778	0.142979
59	SMAD3	627	2.38415	0.0115012	0.419437	0.302987	38	5	FALSE	SMAD3	41.1053	38	0	0	0.802265	FALSE	0	36348	0.140591
60	ANXA1	1629	2.56301	0.00592313	0.390167	0.443995	39	5	FALSE	ANXA1	31.3077	39	0	0	0.776713	FALSE	0	20426	0.140393
61	NOS3	126	2.29268	0.0113357	0.43617	0.357692	40	5	FALSE	NOS3	45.95	40	0	0	0.815331	FALSE	0	39838	0.140951
62	F2	252	2.44512	0.0228793	0.408978	0.216667	40	5	FALSE	F2	26.275	40	0	0	0.793554	FALSE	0	53406	0.100962
63	PIK3R2	282	2.44715	0.0037101	0.408638	0.35641	40	5	FALSE	PIK3R2	34.125	40	0	0	0.793264	FALSE	0	18846	0.127715
64	ERBB2	333	2.38415	0.004185	0.419437	0.437179	40	5	FALSE	ERBB2	48.975	40	0	0	0.802265	FALSE	0	18878	0.164899
65	CCL2	414	2.42886	0.00182085	0.411715	0.512821	40	5	FALSE	CCL2	46.3	40	0	0	0.795877	FALSE	0	11964	0.168364
66	CDK1	72	2.51626	0.0113174	0.397415	0.279268	41	5	FALSE	CDK1	28.4634	41	0	0	0.783391	FALSE	0	38770	0.118496
67	CYCS	171	2.36179	0.0409786	0.423408	0.210976	41	4	FALSE	CYCS	29.5366	41	0	0	0.805459	FALSE	0	107122	0.100724
68	STAT1	562	2.36382	0.00206549	0.423044	0.441463	41	5	FALSE	STAT1	49.8537	41	0	0	0.805168	FALSE	0	12840	0.166735
69	ADCY1	1353	2.61382	0.0202092	0.382582	0.337805	41	5	FALSE	ADCY1	24.1707	41	0	0	0.769454	FALSE	0	48086	0.112605
70	IL2	195	2.45935	0.00266549	0.406612	0.430894	42	5	FALSE	IL2	47.4048	42	0	0	0.791521	FALSE	0	15444	0.177546
71	IL4	335	2.38618	0.0112667	0.41908	0.396051	42	5	FALSE	IL4	41.1429	42	0	0	0.801974	FALSE	0	37632	0.144361
72	PRKCA	890	2.40041	0.0111319	0.416596	0.155633	42	5	FALSE	PRKCA	27.7381	42	0	0	0.799942	FALSE	0	36652	0.0966484
73	PPARG	247	2.36992	0.00916928	0.421955	0.301218	43	5	FALSE	PPARG	41.093	43	0	0	0.804297	FALSE	0	30676	0.138749
74	IL10	293	2.38821	0.00326535	0.418723	0.442424	45	5	FALSE	IL10	44.1556	45	0	0	0.801684	FALSE	0	19222	0.153852
75	PTEN	296	2.38211	0.00288996	0.419795	0.414493	46	5	FALSE	PTEN	46.6087	46	0	0	0.802555	FALSE	0	14880	0.159619
76	PTGS2	697	2.3313	0.00992454	0.428945	0.395169	46	5	FALSE	PTGS2	45.3043	46	0	0	0.809814	FALSE	0	36154	0.147092
77	CREB1	450	2.24187	0.0207107	0.446056	0.277521	47	5	FALSE	CREB1	41.9787	47	0	0	0.82259	FALSE	0	60984	0.122683
78	MMP9	516	2.3435	0.00784368	0.426713	0.396277	48	5	FALSE	MMP9	44.4167	48	0	0	0.808072	FALSE	0	29600	0.148551
79	AR	182	2.3374	0.0158128	0.427826	0.309524	49	5	FALSE	AR	42.6939	49	0	0	0.808943	FALSE	0	56598	0.14044
80	AGT	351	2.32317	0.0155479	0.430446	0.332483	49	5	FALSE	AGT	34.6939	49	0	0	0.810976	FALSE	0	57970	0.116033
81	CTNNB1	244	2.30894	0.0248957	0.433099	0.290612	50	5	FALSE	CTNNB1	39.54	50	0	0	0.813008	FALSE	0	64890	0.125397
82	IL1B	288	2.38415	0.00526177	0.419437	0.394286	50	5	FALSE	IL1B	41.5	50	0	0	0.802265	FALSE	0	23588	0.147163
83	PRKACA	1480	2.32114	0.0310994	0.430823	0.123265	50	5	FALSE	PRKACA	27.44	50	0	0	0.811266	FALSE	0	82024	0.0894771
84	CCND1	109	2.39228	0.00578129	0.418012	0.367843	51	5	FALSE	CCND1	43.7647	51	0	0	0.801103	FALSE	0	32166	0.154101
85	MTOR	227	2.34756	0.0080247	0.425974	0.331825	52	5	FALSE	MTOR	43.5577	52	0	0	0.807491	FALSE	0	28224	0.14471
86	RELA	237	2.28455	0.00512848	0.437722	0.343251	53	5	FALSE	RELA	44	53	0	0	0.816492	FALSE	0	27560	0.137072
87	CASP3	107	2.24593	0.0104202	0.445249	0.292256	55	5	FALSE	CASP3	41.4545	55	0	0	0.822009	FALSE	0	44344	0.124115
88	FOS	96	2.2439	0.0156988	0.445652	0.305844	56	5	FALSE	FOS	41.9821	56	0	0	0.8223	FALSE	0	58772	0.125588
89	PIK3R1	164	2.28049	0.00991369	0.438503	0.292811	59	5	FALSE	PIK3R1	37.1186	59	0	0	0.817073	FALSE	0	49936	0.11859
90	PIK3CA	165	2.26829	0.0103107	0.44086	0.3045	59	5	FALSE	PIK3CA	38.6441	59	0	0	0.818815	FALSE	0	52736	0.121141
91	ESR1	298	2.23577	0.0189305	0.447273	0.293785	60	5	FALSE	ESR1	41.9833	60	0	0	0.823461	FALSE	0	74866	0.124901
92	MAPK14	411	2.31301	0.0109347	0.432337	0.250847	60	5	FALSE	MAPK14	37.3333	60	0	0	0.812427	FALSE	0	39176	0.122004
93	HSP90AA1	231	2.2561	0.0270642	0.443243	0.201442	65	5	FALSE	HSP90AA1	34.8462	65	0	0	0.820557	FALSE	0	88846	0.106843
94	CXCL8	348	2.27846	0.0202905	0.438894	0.326807	66	5	FALSE	CXCL8	39.9697	66	0	0	0.817364	FALSE	0	80310	0.12852
95	MYC	357	2.20732	0.023289	0.453039	0.281585	66	5	FALSE	MYC	40.803	66	0	0	0.827526	FALSE	0	77468	0.119263
96	APP	713	2.2439	0.0410998	0.445652	0.239161	66	5	FALSE	APP	34.7121	66	0	0	0.8223	FALSE	0	128488	0.108043
97	EGF	208	2.17276	0.023034	0.460243	0.284507	71	5	FALSE	EGF	41.0423	71	0	0	0.832462	FALSE	0	86866	0.115939
98	TNF	92	2.22764	0.0123871	0.448905	0.314945	72	5	FALSE	TNF	40.1111	72	0	0	0.824623	FALSE	0	58862	0.122664
99	VEGFA	134	2.17683	0.013779	0.459384	0.307664	74	5	FALSE	VEGFA	41.2703	74	0	0	0.831882	FALSE	0	61124	0.118934
100	EGFR	207	2.18293	0.0257631	0.458101	0.245263	76	5	FALSE	EGFR	39.1579	76	0	0	0.83101	FALSE	0	93386	0.113463
101	IL6	294	2.1687	0.0225698	0.461106	0.272508	82	5	FALSE	IL6	39.1829	82	0	0	0.833043	FALSE	0	97376	0.114906
102	JUN	95	2.08943	0.0541493	0.478599	0.257714	83	5	FALSE	JUN	38.9518	83	0	0	0.844367	FALSE	0	141268	0.103047
103	INS	89	2.07114	0.0685311	0.482826	0.197811	86	4	FALSE	INS	35.4651	86	0	0	0.84698	FALSE	0	181626	0.0937308
104	MAPK8	189	2.11992	0.0258969	0.471716	0.217054	87	5	FALSE	MAPK8	36.0575	87	0	0	0.840012	FALSE	0	92264	0.10016
105	MAPK1	359	2.03455	0.0548073	0.491508	0.193861	101	5	FALSE	MAPK1	35.4059	101	0	0	0.852207	FALSE	0	174622	0.0921772
106	TP53	118	2.05081	0.0622507	0.487611	0.196406	106	5	FALSE	TP53	34.066	106	0	0	0.849884	FALSE	0	193802	0.0915754
107	AKT1	103	2.03862	0.0593955	0.490528	0.173013	116	5	FALSE	AKT1	33.1552	116	0	0	0.851626	FALSE	0	186012	0.0898047
