# Supplementary material for: A Comprehensive Network Pharmacology-Based Strategy to Investigate Multiple Mechanisms of HeChan Tablet on Lung Cancer
Source: Evid Based Complement Alternat Med. 2020 May 30;2020:7658342. doi: 10.1155/2020/7658342 (PMC7277035; doi:10.1155/2020/7658342)
Supplement: Supplementary Materials — Supplementary file 1: compounds and putative target genes of HCT. Supplementary file 2: 507 common target genes among HCT and related genes of lung cancer. Supplementary file 3: 34 common target genes among HCT and known therapeutic genes of lung cancer. Supplementary file 4: hub gene information of common HCT-related genes of lung cancer PPI network. Supplementary file 5: hub gene information of HCT-known therapeutic genes of lung cancer PPI network, Supplementary file 6: information of hub genes filtered by PPI networks. [file 7658342.f1.zip › 7658342.f1/Supplementary file 5_ECAM_3084841.xlsx]

## Sheet: sheet 1
	shared.name	SUID	AverageShortestPathLength	BetweennessCentrality	ClosenessCentrality	ClusteringCoefficient	Degree	Eccentricity	IsSingleNode	name	NeighborhoodConnectivity	NumberOfDirectedEdges	NumberOfUndirectedEdges	PartnerOfMultiEdgedNodePairs	Radiality	selected	SelfLoops	Stress	TopologicalCoefficient
1	EGFR	86	2.04	0.0923773	0.490196	0.466667	10	4	FALSE	EGFR	6.5	10	0	0	0.792	FALSE	0	184	0.382353
2	VEGFA	93	2.16	0.148495	0.462963	0.377778	10	4	FALSE	VEGFA	5.6	10	0	0	0.768	FALSE	0	250	0.423077
3	MAPK1	101	2.04	0.25549	0.490196	0.254545	11	4	FALSE	MAPK1	4.90909	11	0	0	0.792	FALSE	0	344	0.337662
