# Supplementary material for: A Comprehensive Network Pharmacology-Based Strategy to Investigate Multiple Mechanisms of HeChan Tablet on Lung Cancer
Source: Evid Based Complement Alternat Med. 2020 May 30;2020:7658342. doi: 10.1155/2020/7658342 (PMC7277035; doi:10.1155/2020/7658342)
Supplement: Supplementary Materials — Supplementary file 1: compounds and putative target genes of HCT. Supplementary file 2: 507 common target genes among HCT and related genes of lung cancer. Supplementary file 3: 34 common target genes among HCT and known therapeutic genes of lung cancer. Supplementary file 4: hub gene information of common HCT-related genes of lung cancer PPI network. Supplementary file 5: hub gene information of HCT-known therapeutic genes of lung cancer PPI network, Supplementary file 6: information of hub genes filtered by PPI networks. [file 7658342.f1.zip › 7658342.f1/Supplementary file 6_ECAM_3084842.xlsx]

## Sheet: final hub gene
	shared.name	SUID	AverageShortestPathLength	BetweennessCentrality	ClosenessCentrality	ClusteringCoefficient	Degree	Eccentricity	IsSingleNode	name	NeighborhoodConnectivity	NumberOfDirectedEdges	NumberOfUndirectedEdges	PartnerOfMultiEdgedNodePairs	Radiality	selected	SelfLoops	Stress	TopologicalCoefficient
1	TNF	339	1.54717	0.0148747	0.646341	0.486395	49	3	FALSE	TNF	34.8367	49	0	0	0.863208	FALSE	0	2348	0.331778
2	MYC	396	1.53774	0.0205538	0.650307	0.429422	49	2	FALSE	MYC	34.8367	49	0	0	0.865566	FALSE	0	3324	0.328648
3	INS	376	1.5283	0.0366635	0.654321	0.421961	51	3	FALSE	INS	34.1569	51	0	0	0.867925	FALSE	0	4058	0.328243
4	IL6	382	1.50943	0.0186975	0.6625	0.465893	53	3	FALSE	IL6	35.0943	53	0	0	0.872642	FALSE	0	3180	0.334232
5	VEGFA	402	1.5	0.0202429	0.666667	0.441649	54	3	FALSE	VEGFA	34.4815	54	0	0	0.875	FALSE	0	3234	0.328395
6	EGFR	332	1.48113	0.0311385	0.675159	0.377778	55	2	FALSE	EGFR	32.8545	55	0	0	0.879717	FALSE	0	3752	0.309949
7	MAPK8	322	1.4717	0.0261272	0.679487	0.375313	57	3	FALSE	MAPK8	32.2456	57	0	0	0.882075	FALSE	0	3368	0.307101
8	JUN	323	1.46226	0.0245857	0.683871	0.429825	57	2	FALSE	JUN	34.4561	57	0	0	0.884434	FALSE	0	3438	0.325058
9	MAPK1	412	1.40566	0.0371286	0.711409	0.359447	63	2	FALSE	MAPK1	31.9841	63	0	0	0.898585	FALSE	0	4552	0.301737
10	TP53	309	1.38679	0.059006	0.721088	0.366827	65	2	FALSE	TP53	31.7538	65	0	0	0.903302	FALSE	0	7192	0.302271
11	AKT1	300	1.31132	0.0666324	0.76259	0.314688	73	2	FALSE	AKT1	30.3699	73	0	0	0.92217	FALSE	0	6914	0.286508
